# Supplementary material for: SIMPEL: using stable isotopes to elucidate dynamics of context specific metabolism
Source: Research Square preprint supplement (doi:10.21203/rs.3.rs-1891366/v1), 2022-10-04
Supplement: Supplementary file 1 [file 3a5f3e439ab56886ffc61990.xlsx]

## Sheet: Pool sizes of PCs and DAGs
Table 1: Pool sizes calculated based on description provided in the Methods section.
	Accurate Quant (nmol / mg DW)
34:1-PC	0.541 ± 0.13
34:2-PC	3.826 ± 0.77
34:3-PC	2.843 ± 0.27
34:4-PC	0.03 ± 0.003
36:2-PC	1.417 ± 0.43
36:3-PC	4.279 ± 0.97
36:4-PC	7.571 ± 1.39
36:5-PC	8.594 ± 1.2
36:6-PC	5.044 ± 0.29
38:2-PC	0.02 ± 0.02
38:3-PC	0.713 ± 0.19
38:4-PC	2.063 ± 0.28
38:5-PC	0.991 ± 0.12
38:6-PC	0.276 ± 0.04
34:0-DAG	0.024 ± 0.01
34:1-DAG	0.259 ± 0.05
34:2-DAG	1.356 ± 0.35
34:3-DAG	1.229 ± 0.1
34:4-DAG	0.016 ± 0.005
36:0-DAG	0.018 ± 0.01
36:1-DAG	0.149 ± 0.05
36:2-DAG	0.897 ± 0.15
36:3-DAG	2.455 ± 0.53
36:4-DAG	4.224 ± 0.5
36:5-DAG	2.976 ± 0.76
36:6-DAG	3.824 ± 1.24
38:1-DAG	0.033 ± 0.02
38:2-DAG	0.189 ± 0.04
38:3-DAG	0.791 ± 0.2
38:4-DAG	1.388 ± 0.17
38:5-DAG	0.381 ± 0.05
38:6-DAG	0.084 ± 0.02

## Sheet: MIDs for PCs and DAGs (SIMPEL)
Table 2: MIDs represented as proportions. Data was generated using SIMPEL. NA correction was also performed within SIMPEL.
		Time (hours)	0			2			4			8			16			32
ID	Isotopologue	Replicate	1	2	3	1	2	3	1	2	3	1	2	3	1	2	3	1	2	3
PC(34:1)	M0		0.98883	0.995324	0.97305	0.97171	0.790252	0.966249	0.688188	0.623339	0.677383	0.409796	0.411587	0.412285	0.226575	0.237518	0.248202	0.0645947	0.0645344	0.0863361
	M1		0	0	0	0.0039293	0.0159481	0.00380211	0.0445771	0.0393493	0.0541317	0.0452463	0.033966	0.0277504	0.0259042	0.014016	0.0122821	0.022059	0.0148984	0.016931
	M2		0	0	0	0.0150452	0.013088	0.0168742	0.119755	0.125222	0.101742	0.0735831	0.0711982	0.0688055	0.0374169	0.0399198	0.0429504	0.0329051	0.0218702	0.0273885
	M3		0	0	0	0.00205928	0	0.000205618	0.0339097	0.0403536	0.0428763	0.0617801	0.0603154	0.0532146	0.0463019	0.0420042	0.0502234	0.0526834	0.040482	0.0339772
	M4		0	0	0	0.00163681	0.00102133	0.000985087	0.0493702	0.0656381	0.0517311	0.0761796	0.0756045	0.0820052	0.0685878	0.0661929	0.0656279	0.0606211	0.0485904	0.0438783
	M5		0	0	0.000700106	0	0.0835645	0.000890594	0.0212846	0.0276675	0.0226091	0.0596771	0.0602547	0.0611827	0.0632663	0.0610667	0.0686624	0.0777684	0.070661	0.0721663
	M6		0.0058233	0.000137733	0.000232035	6.78868e-05	0.00134422	0	0.0172076	0.0318798	0.0214964	0.0635817	0.0642099	0.064311	0.0794837	0.0837184	0.0822509	0.0837835	0.0768313	0.0706237
	M7		0	0.000111841	0.00246552	0	0	0	0.00825542	0.0134582	0.00855734	0.0481838	0.0490528	0.0525596	0.0749434	0.0723397	0.0679826	0.0856989	0.0801967	0.0727173
	M8		0.00534691	0.00374663	0.0145428	0.00102212	0.00100854	0.000109571	0.00749894	0.0140416	0.00629229	0.0404403	0.045008	0.0463165	0.0701389	0.0713192	0.073525	0.0789262	0.0867588	0.0817377
	M9		0	0.000505581	0.00754626	0.000887334	0	7.84837e-05	0.00286399	0.00611884	0.00583881	0.0305073	0.0332074	0.0365174	0.0585099	0.055311	0.0553543	0.0774086	0.0759447	0.0761671
	M10		0	0	0	0.0007479	0.0288196	0.00985579	0.00187058	0.00455366	0.0018512	0.0246599	0.0272749	0.0220553	0.0527541	0.0561355	0.0554457	0.0730047	0.0772305	0.0655004
	M11		0	0	0	0	0.0490057	0.000307586	0.00115424	0.00353658	0.00170321	0.018897	0.0186756	0.0216236	0.0428392	0.0455206	0.0381908	0.0555475	0.0670936	0.0718177
	M12		0	0	0	0	0	0	0.000597769	0.0013906	0.00260288	0.013504	0.0146698	0.0147868	0.0386736	0.0365101	0.0338294	0.0596461	0.0630259	0.0546418
	M13		0	0	0	0	0	0	0.000808248	0.00118885	0.000687732	0.0117667	0.0108087	0.0102038	0.0286423	0.0304705	0.0281087	0.0416553	0.0519809	0.0566122
	M14		0	0	0	0.00114222	0.0087853	0	0.000448139	0.00157073	5.74781e-05	0.00724759	0.00770433	0.0078446	0.0236084	0.0255648	0.0201834	0.0404336	0.0411834	0.0444278
	M15		0	0	0	0	0.00103419	0	0.000137223	0	0	0.00539304	0.00570386	0.00616623	0.0200425	0.0191093	0.0180271	0.0305398	0.0363144	0.03593
	M16		0	0	0	5.13259e-05	0	0	7.84635e-05	0.000255484	0	0.00331637	0.00472918	0.00613818	0.0133079	0.014348	0.0141158	0.0218725	0.02844	0.0259021
	M17		0	1.37602e-08	2.35077e-07	0	0.000148567	4.32708e-06	0	0	0	0.00250081	0.00274067	0.00351058	0.0106316	0.0106996	0.00839789	0.0186768	0.0226254	0.0221197
	M18		0	0.000146592	0.000616738	0.00170022	0.000666011	0.000638096	0.00155987	0.00015169	0.000364461	0.0019019	0.00200692	0.000420497	0.00801312	0.00744356	0.00660492	0.0118696	0.0142654	0.0142693
	M19		0	2.77113e-05	0.000846059	0	0.00517366	0	0.000378215	0.000124996	7.56604e-05	0.000912495	0.00108523	0.00152867	0.00482784	0.00516838	0.00490134	0.00813312	0.00784912	0.0123971
	M20		0	0	0	0	0	0	0	1.49937e-05	0	0.000557733	0	0	0.0030552	0.00256217	0.00288258	0.000226019	0.00573934	0.00644474
	M21		0	0	0	0	4.23223e-05	0	5.77804e-05	0	0	0.000302373	0.000196796	0.00077381	0.00193962	0.00180486	0.00102518	0.00194605	0.00237161	0.0057093
	M22		0	0	0	0	9.83233e-05	0	0	0.000143841	0	6.4838e-05	0	0	0.0005367	0.00125629	0.00122578	0	0.00111266	0.00230465
PC(34:2)	M0		0.964761	0.967392	0.973444	0.928882	0.837733	0.925894	0.738959	0.677165	0.754827	0.464994	0.451432	0.414172	0.317212	0.279127	0.290205	0.131096	0.1245	0.152246
	M1		0	0	0	0	0.0011939	0	0.0316399	0.0349286	0.0242578	0.041461	0.0381393	0.0425479	0.028423	0.0260597	0.0292216	0.0263717	0.021306	0.0225645
	M2		0	0	0	0.0023596	0.00235327	0.00383641	0.0837346	0.104609	0.0882341	0.0798359	0.0835698	0.0842049	0.0560508	0.0600731	0.0563025	0.0345562	0.0307776	0.0323509
	M3		0	0	0	0	0	0	0.0198261	0.0271795	0.0189201	0.0534793	0.0608304	0.0643424	0.0538877	0.0537728	0.0563096	0.0490253	0.0432421	0.0428323
	M4		0	0	0	0	0	0	0.0294858	0.0401373	0.0296377	0.0673219	0.071501	0.0739459	0.0684132	0.0692716	0.0701816	0.0581143	0.0504165	0.0490576
	M5		0	0	0	0.000149239	0	5.83447e-05	0.00772952	0.0141194	0.0101633	0.0497099	0.0579378	0.0589824	0.0605456	0.0648223	0.0664658	0.0727396	0.0640615	0.0563263
	M6		0	7.18562e-06	0	5.46248e-05	0.000222166	8.07332e-05	0.00958933	0.0157371	0.0106619	0.0518808	0.0575016	0.0586042	0.0706329	0.0733558	0.0775446	0.0805482	0.070253	0.0694556
	M7		0	0	0.00031297	0	1.64737e-05	4.00026e-05	0.0035341	0.0059436	0.00329644	0.0340111	0.0405948	0.0457486	0.0608498	0.064853	0.0576414	0.0802171	0.0784513	0.0700385
	M8		3.53713e-05	0	0	3.37638e-05	0.00137805	0.000246616	0.00262224	0.0057488	0.00302554	0.0322588	0.0376365	0.0375001	0.0584072	0.0599661	0.0645376	0.0800879	0.074451	0.0709553
	M9		5.29572e-05	0.000139841	0.000129893	0.000688729	0.000360769	0	0.00143326	0.00228571	0.00171771	0.0222405	0.0266404	0.0255128	0.0471113	0.0508734	0.0490866	0.0658478	0.0713148	0.0653286
	M10		0.00889196	0.00916956	0.000341764	0	0.0971524	0.000722354	0.00058015	0.00188409	0.000901963	0.0171341	0.019997	0.0221766	0.0421567	0.0454791	0.0422251	0.0595605	0.0674065	0.062462
	M11		0.000663671	0	0.000455963	0.000153028	0.0123422	0.000224471	0.000466726	0.000943779	0.000469372	0.0119739	0.0147422	0.0149671	0.0310317	0.0348959	0.0335559	0.054775	0.0587068	0.059271
	M12		0.00367418	0.00485281	0.00473876	0.0156593	0.00611786	0.00891732	0.0101515	0.000813001	0.000244106	0.00952466	0.011032	0.0118314	0.026582	0.0300651	0.0284442	0.0435771	0.0512637	0.0486858
	M13		0.000322802	0.000129993	0.000869133	0.00166975	0.000743999	0.00121452	0.00172708	0.000198687	0.00385731	0.00692325	0.00804198	0.00818783	0.0196271	0.0222181	0.0213306	0.0434435	0.0462113	0.0443113
	M14		0.000597972	0.000493517	0	2.22014e-05	0.0059054	0	0.000233821	0.00115141	0	0.00542541	0.00567744	0.0060142	0.0174703	0.0182849	0.0160791	0.0308209	0.040405	0.0362641
	M15		0.000548212	8.51794e-06	0	3.30328e-05	0.000750221	0	0.000108686	3.7804e-05	0	0.0034211	0.00428212	0.00381741	0.0127984	0.0147539	0.0124339	0.0298583	0.0305809	0.0328191
	M16		0	0	0	0.000236479	0.0013473	0.000182546	0.000286021	0.000813308	0.000170135	0.0022217	0.00276829	0.00299373	0.00914518	0.00984862	0.00930533	0.0200465	0.0252262	0.024397
	M17		0.000718092	0.000273056	0	0.00469904	0.0202274	0.00658076	0.00319721	0.00923612	0.00355381	0.00156358	0.00168511	0.00165655	0.0072502	0.00735464	0.00645825	0.0126306	0.0183722	0.01986
	M18		0	0	5.26069e-08	0.000468847	0.00248307	0.00126299	0.000514548	0.00149887	0.000832687	0.00101686	0.00112774	0.00117195	0.00457781	0.00506252	0.00451299	0.0118156	0.0135675	0.0143918
	M19		0	3.44542e-05	4.64215e-05	0	0	5.67063e-05	0	0	0	0.000508993	0.000614331	0.000650384	0.00333846	0.00333405	0.00314438	0.00605426	0.00813054	0.00991047
	M20		0	0	0	0	0	0	2.31651e-05	0	0	0.000412103	0.000206222	0.000234407	0.00186424	0.00207431	0.00180431	0.00358518	0.00491661	0.00659071
	M21		0	0	0.00014963	1.94598e-05	0.000224738	2.19772e-05	0.000106418	0	0	0.000147662	0.000296346	0.00039278	0.00132039	0.00113164	0.00109182	0.0026238	0.00320007	0.00477954
	M22		0.0161561	0.0109469	0.0114808	0.0304484	0.00641717	0.0420425	0.0371209	0.0430093	0.0342605	0.0271414	0.00265156	0.0127924	0.000884145	0.000758222	0.000438304	0.00103961	0.00171904	0.00231005
	M23		0.00054727	0.00249832	0.00254217	0.0106144	0.000420412	0.0062791	0.0104528	0.00673681	0.00663848	0.0103291	0	0.00355359	0.0002222	0.000411024	0.00164295	0.000436135	0.00108381	0.00165715
	M24		0.00303065	0.0040541	0.0054883	0.00380839	0.00261017	0.00233897	0.00647724	0.00582256	0.00433049	0.005063	0.00109375	0.00399828	0.000100541	0.00215255	0	0.00112882	0.00040367	0.000898284
	M25		0	0	0	0	0	0	0	0	0	0	0	0	9.72473e-05	0	3.62937e-05	0	3.20421e-05	0.000236168
PC(34:3)	M0		0.990123	0.985727	0.981315	0.985515	0.978866	0.981942	0.899389	0.859814	0.872606	0.596044	0.579617	0.579869	0.380202	0.350978	0.36249	0.163088	0.152088	0.162002
	M1		0	0	0.00623513	0	0	0.00195482	0.0154605	0.0203674	0.0273534	0.0451127	0.0418872	0.045679	0.0441238	0.0421693	0.0409928	0.0344393	0.0296887	0.0301524
	M2		0	0	0	0	0	0	0.0445823	0.0605431	0.0483715	0.0869932	0.0893932	0.0870911	0.0714705	0.0690684	0.0697999	0.0432962	0.0382252	0.0376112
	M3		0	0	0	0	0	0	0.0124439	0.017803	0.0165076	0.0552618	0.0568855	0.0576724	0.0681141	0.0679843	0.0698833	0.0541301	0.0503589	0.0502135
	M4		0	0	0	0	0	0	0.0109751	0.0179574	0.0151188	0.056406	0.0609558	0.0571943	0.0689208	0.0673939	0.069189	0.0540751	0.0491733	0.047056
	M5		0	0	0	0.00344708	0.00579467	0.00313408	0.00410003	0.00584851	0.00462661	0.038642	0.0373492	0.0382785	0.0603327	0.0608301	0.0613008	0.0656651	0.0628794	0.0572697
	M6		2.39592e-05	2.57834e-06	8.60272e-05	0	0	0	0.00299519	0.00552468	0.00506565	0.035021	0.040622	0.0406771	0.0601027	0.0669932	0.0639124	0.0738264	0.070264	0.0663005
	M7		0	0	0	0	5.41934e-05	0	0.000930601	0.00227692	0.00114965	0.0228751	0.024379	0.0231349	0.0517194	0.0560862	0.0533748	0.0753609	0.0766358	0.0714195
	M8		0	0.000115548	0	0	0	0	0.000872511	0.00160885	0.0013341	0.019685	0.0210667	0.0227475	0.0469781	0.0488178	0.0487583	0.0717465	0.0721307	0.0707503
	M9		0	0	0	0	0	0	0.000480828	0.000820883	0.000595672	0.0126384	0.0140779	0.0129969	0.0347985	0.0387366	0.0377658	0.0662275	0.0653874	0.0664815
	M10		0	8.96604e-07	0	0	0	2.40535e-05	0	0.000563779	0.00027127	0.00968876	0.0104668	0.0106077	0.0289668	0.0331759	0.0295893	0.0555742	0.060528	0.0590967
	M11		1.30873e-05	3.56722e-05	0.000116726	0	0.000530947	6.57697e-05	4.39437e-05	8.29914e-05	0	0.00613779	0.00704297	0.0070267	0.021679	0.0248517	0.0243766	0.0501319	0.0531191	0.0528535
	M12		0.00134362	0.00252936	0.00155116	0.00217684	0.004034	0.00250264	0.00155834	0.00114949	0.0008911	0.00408253	0.00503817	0.0047356	0.0154601	0.0182553	0.0175653	0.0402741	0.043768	0.0421217
	M13		0	0.000396133	0	0.000404432	0.000786905	4.84009e-05	0	0.000103479	0.000165262	0.00367964	0.00361257	0.00311388	0.0132684	0.0152106	0.0146214	0.0354328	0.0392905	0.0401644
	M14		0.000402219	7.54261e-05	4.03266e-05	9.61133e-05	0.00304605	0.000931516	0.000593345	0.000396321	0.000643691	0.00193643	0.00233684	0.0025685	0.00895346	0.0113554	0.010147	0.0296076	0.0337151	0.0331189
	M15		0.000129594	3.58711e-06	0.000135093	5.13639e-05	0.000215215	0	0	0	0.000107479	0.00133898	0.00149386	0.00157487	0.00761847	0.00818617	0.00794421	0.0256765	0.0284769	0.0287816
	M16		0	0	0	0	0	0	7.41815e-06	0	7.842e-05	0.000833568	0.0010655	0.00123085	0.00490205	0.00610672	0.00521359	0.0191689	0.0228673	0.0229759
	M17		0	0	0	1.34329e-05	0	0	0	9.76084e-06	0	0.000709558	0.000685633	0.000778904	0.00361407	0.0047588	0.00372947	0.0138716	0.0157175	0.0191909
	M18		2.19297e-05	0	0	4.19119e-05	0	0	2.07326e-05	1.02484e-05	2.42388e-06	0.000404102	0.000392997	0.00034427	0.0028571	0.00295873	0.00274015	0.0105342	0.0129507	0.0142643
	M19		0	0	2.19401e-05	8.74995e-06	0	3.35618e-05	4.44557e-06	1.50664e-05	0	0.000154611	0.000294299	0.00021215	0.00124297	0.00189191	0.00183675	0.00676324	0.00929604	0.0101543
	M20		7.41014e-06	0	0	0.000579785	0.00238885	0.000884629	0.000365057	0.000853902	0.000291435	0.000590196	0.000190943	6.705e-05	0.00115604	0.000975715	0.00118147	0.00471019	0.00522353	0.00721077
	M21		0	0	2.30687e-05	6.65926e-05	0.000112191	0.000160684	3.292e-05	4.22164e-05	0	6.8657e-05	1.54502e-05	1.79343e-05	0.000639667	0.000622973	0.000704793	0.00325337	0.00382562	0.0048249
	M22		0	0	0	0	0	7.62283e-06	0	0	0	1.00311e-05	0	2.2646e-05	0.000241138	0.000328086	0.000338461	0.00154403	0.0021338	0.00288655
	M23		0	8.9823e-05	7.8687e-05	0	0.000268926	7.97878e-05	0	0	0	1.79893e-05	2.45814e-05	0	0.000218543	0.000103273	0.00023722	0.000709675	0.00124282	0.00180706
	M24		0.00704903	0.00930316	0.00837481	0.00684509	0.00321352	0.0065712	0.00424006	0.00342251	0.00423978	0.00135913	0.000804904	0.00183137	0.00186874	0.00157537	0.00179873	0.000623561	0.000721524	0.000886709
	M25		0.000885713	0.00172048	0.00202218	0.000753363	0.000688986	0.00165944	0.000903688	0.000785549	0.000580428	0.000308966	0.000301025	0.000526943	0.000550892	0.000585524	0.000508646	0.000269437	0.000292398	0.00040499
PC(34:4)	M0		0.917104	0.89274	0.893543	0.859231	0.383413	0.769296	0.82493	0.681288	0.742489	0.488612	0.447462	0.400913	0.295824	0.290053	0.286607	0.146466	0.112583	0.120555
	M1		0	0	0	0	0.031911	0	0	0	0.0360198	0.0107681	0.00316355	0.0424921	0.026303	0.00141567	0.0508926	0.0100677	0.0222824	0.0406703
	M2		0	0	0	0	0.0146875	0	0.0621909	0.0985754	0.0797621	0.113982	0.110811	0.112429	0.0772279	0.0716045	0.056461	0.0389229	0.0302522	0.0245318
	M3		0	0	0	0	0	0	0.019891	0.0309943	0.00839564	0.060851	0.0692997	0.0685561	0.051784	0.0628485	0.0673035	0.0581883	0.0430107	0.0482109
	M4		0.0215811	0.0310748	0.0144919	0.00925756	0.0382892	0.0107681	0.0170781	0.027131	0.0309125	0.0761342	0.0743463	0.0982193	0.0739917	0.0868707	0.0809326	0.0535926	0.057914	0.0572369
	M5		0.0106319	0.0108289	0.0249004	0.0876745	0.105665	0.166775	0.0075923	0.0160524	0.00851137	0.0517042	0.0612633	0.0515589	0.0706736	0.0772404	0.0734934	0.0717091	0.066745	0.0629173
	M6		0.00732278	0.0130404	0.0222676	0	0.0877895	0.00377413	0.0266228	0.0122174	0.00740059	0.0504026	0.055668	0.0688595	0.0786617	0.0774197	0.0881167	0.0836521	0.0761622	0.0775904
	M7		0	0	0.00338281	0	0	0	0	0.000559302	0.0069795	0.0288735	0.0395012	0.0424928	0.0767571	0.0627213	0.0598887	0.0710759	0.0701174	0.0609225
	M8		4.73782e-05	0	0	0	0	0	0	0.00207314	0	0.0311173	0.0310075	0.0285521	0.0472078	0.0674157	0.0608551	0.0661781	0.0780273	0.0815637
	M9		0	0.00026926	0	0	0	0	0.00015419	0.00219228	0.000389962	0.0191543	0.0246016	0.0338915	0.0504319	0.0475545	0.0400455	0.0769644	0.0641718	0.0636778
	M10		0	0	0	0	0.001252	0	0	0	0	0.0161273	0.0183203	0.00710364	0.0313518	0.0384782	0.0401033	0.0637888	0.0674531	0.0647074
	M11		0	0.00249139	0	0	0	2.47811e-06	0	0	0	0.00719942	0.0120524	0.0168008	0.0357895	0.0317021	0.0171515	0.0652536	0.0622672	0.0554
	M12		0.0105781	0.0102934	0.00356448	0.00213519	0.187253	0.00395514	0.00208933	0.0409412	0.0184386	0.00785816	0.00688671	0.00510718	0.0188942	0.0278715	0.0187301	0.0416226	0.0592954	0.0505413
	M13		0.0248465	0.0148561	0.00249821	0.00911453	0.0095552	0	0.00470223	0.0543516	0.00285649	0.00609706	0.0136527	0.0116278	0.0223477	0.012289	0.0234836	0.047818	0.050263	0.0435234
	M14		0.00579991	0.0235314	0.0169784	0.0325868	0.138346	0.0431334	0.0318757	0.0324184	0.0519387	0.0192325	0.013587	0.00901794	0.00885682	0.0142859	0.0117974	0.0373591	0.0409461	0.0371999
	M15		0	0	0.0119574	0	0	0.00170069	0	0	0.00428375	0.00390587	0.00867009	6.2896e-05	0.0142185	0.0130271	0.0114143	0.0244649	0.0383026	0.0397494
	M16		0	0	0	0	0	0	0.00206553	0.000542964	0.00126702	0.00264752	0.00124357	0.0019327	0.00849472	0.00747372	0.00433423	0.0265427	0.025149	0.0293537
	M17		0.00208867	0.000874201	0.00641604	0	0	0.000243817	0	0	2.73973e-05	0.00403463	0.00343711	0.000382922	0.00486714	0.00735381	0.00447689	0.00651191	0.0223217	0.024105
	M18		0	0	0	0	0.00183911	0.00035106	0.000807735	0.000662308	0.00032757	0.00129863	0.00502577	0	0.00631672	0.0023742	0.00391304	0.00982084	0.012736	0.0175439
PC(36:1)	M0		0.923209	0.963183	0.967218	0.996246	0.831436	0.983193	0.803921	0.782232	0.815144	0.621734	0.673779	0.67701	0.449395	0.515217	0.531515	0.380317	0.214564	0.272614
	M1		0	0	0	0	0	0	0.020405	0.0164576	0.00703375	0.0326277	0.030434	0.00989873	0.0096265	0	0.00447	0	0.017516	0
	M2		0	0	0	0	0	0.0102041	0.0772713	0.0805436	0.0740112	0.0405358	0.0263056	0.0330449	0.0244469	0.0219303	0.0185428	0	0.0137675	0.0258387
	M3		0	0	0	0.00110568	0.00069608	0	0.0221603	0.02306	0.0232807	0.0410576	0.0383813	0.0286739	0.0295913	0.031401	0.0337638	0.0161547	0.0424067	0.0195237
	M4		0	0	0	0.000971943	0.000368284	0.00094135	0.0367287	0.0420085	0.034812	0.0475285	0.0428243	0.0441385	0.0406466	0.039821	0.0434107	0.0856077	0.0450547	0.0533127
	M5		0.000468841	0.00116277	0	0	0.0843959	0	0.0113097	0.0167028	0.0142358	0.039569	0.0362916	0.042385	0.0402137	0.0499226	0.0475102	0.0852213	0.0615286	0.0805065
	M6		0.00188683	0.000822635	0.00185988	0	0.00212379	0	0.0147227	0.0150825	0.010315	0.0404859	0.034492	0.0383815	0.0593597	0.0518806	0.048079	0.0352502	0.0770974	0.101687
	M7		0	0.000943322	0.00386616	0	0.000826593	0.000987792	0.00364022	0.00967252	0.00735605	0.032755	0.0276143	0.032958	0.0498969	0.0388148	0.0464271	0.126886	0.0739893	0.0403244
	M8		0.000129364	0	6.27359e-05	0.00089533	0	0	0.00465984	0.00563223	0.00670537	0.030196	0.0290912	0.0271593	0.053247	0.0491962	0.0496387	0.0548715	0.0612487	0.0743866
	M9		0.00169224	0.00075136	0.000224962	0	0.00246015	0	0.00216846	0.00194076	0.00205772	0.0159089	0.0163627	0.0157945	0.0486668	0.039111	0.0421191	0.0800547	0.0883529	0.0847805
	M10		0.072533	0.0325028	0.0267678	0	0.0758708	0.00467367	0.00207591	0.00410633	0.00371774	0.0152605	0.0150639	0.0148301	0.0386242	0.0316638	0.0321275	0.0273755	0.0644828	0.025529
	M11		0	0	0	0	0	0	0.000540625	0.00165706	0.000504965	0.0130243	0.00852505	0.0117834	0.0325421	0.0299537	0.0193791	0.0526045	0.0560469	0.0635129
	M12		0	0	0	0.000590664	0	0	4.67853e-05	0.000364684	0.000413007	0.00990467	0.00601657	0.0124743	0.0314379	0.0314502	0.0220251	0	0.0384895	0.0348434
	M13		0	0	0	0.000190192	0	0	0.000349191	0.000371954	0	0.00591248	0.0064018	0.00411259	0.0268223	0.0180977	0.0243075	0.0240925	0.04258	0.0414236
	M14		8.04579e-05	0.000497696	0	0	0	0	0	0	0	0.00584196	0.00431462	0.00215108	0.0174367	0.0142608	0.00861075	0.0174732	0.0391769	0.0340706
	M15		0	0	0	0	0	0	0	0	0	0.00228786	0.00263583	0.00245529	0.0159069	0.0144635	0.00948759	0.0111374	0.028023	0.0213138
	M16		0	0	0	0	0.000858739	0	0	0	0.000197584	0.00348753	0.00146581	0.00261244	0.0145502	0.00954624	0.00957451	0.00295397	0.0224446	0.00289686
	M17		0	0.000136443	0	0	0	0	0	0	0	0.00112056	0	0.000136026	0.0116543	0.00725006	0.00901119	0	0.0132303	0.0211277
	M18		0	0	0	0	0.000963706	0	0	0.000167313	0.00021545	0.000761777	0	0	0.00593461	0.00601941	0	0	0	0.00230726
PC(36:2)	M0		0.976136	0.989176	0.994024	0.956075	0.930289	0.96231	0.693013	0.674664	0.712431	0.505006	0.532226	0.528605	0.377897	0.394634	0.374886	0.230858	0.181563	0.22941
	M1		0	0	0	0.00529234	0.00620035	0	0.0400251	0.0338609	0.0306497	0.0237361	0.0224519	0.0200633	0.0196247	0.0178117	0.0148789	0.00396878	0.00646635	0.0201987
	M2		0	0	0	0.025169	0.017241	0.0278303	0.0960259	0.0877576	0.0913245	0.0584917	0.0521502	0.0503288	0.036313	0.0364933	0.0382542	0.0263818	0.0200933	0.0192778
	M3		0	0	0	0	0.000545745	0	0.033718	0.033781	0.0291265	0.0400811	0.0415347	0.0394403	0.0354098	0.0363956	0.0403424	0.0364077	0.0268566	0.026398
	M4		0	0	0	0.00372332	0.00140724	0.00355985	0.0486808	0.050341	0.0490724	0.0505787	0.052523	0.051098	0.0457232	0.0493809	0.0512349	0.04915	0.0361452	0.0353186
	M5		0	0	0.00045241	1.62001e-05	0.000574635	9.76454e-06	0.0224485	0.0239476	0.0199509	0.0392685	0.0411902	0.0390616	0.0446445	0.0444576	0.0445951	0.0471809	0.0438611	0.0521505
	M6		0.00293936	0.000397921	0.000882531	0.000136767	0.00509234	0.000405387	0.0225436	0.0281159	0.0238973	0.0459984	0.0443866	0.0450139	0.0515054	0.0539432	0.0552479	0.0593799	0.0523345	0.0548324
	M7		0	0.00036961	0	3.97823e-05	0	0.000177456	0.0132609	0.0171531	0.0134802	0.034586	0.0345116	0.0379111	0.0444864	0.0451238	0.0513921	0.0660097	0.05638	0.0522423
	M8		0	0	0.000279637	0	0	2.73099e-05	0.010197	0.0161074	0.00913325	0.0374358	0.0360099	0.0341773	0.0501768	0.0498773	0.0469527	0.0737153	0.0635387	0.0603036
	M9		0	0.000110631	0.000355145	0.000218218	0.000109095	0.000245785	0.00683361	0.00998688	0.00658087	0.0312539	0.0267441	0.0299136	0.041626	0.0410307	0.0435214	0.0595723	0.0663242	0.0592728
	M10		0.0173076	0.00605344	0.000834598	0	0.0307187	0.00103953	0.00511035	0.00798427	0.00566704	0.0275131	0.0235886	0.0254785	0.0390442	0.0405176	0.0458529	0.0514989	0.0600525	0.058805
	M11		0.00166616	0.000519499	6.45326e-05	4.00138e-05	0.00301709	0.000301903	0.00310742	0.00524751	0.00285215	0.0231476	0.0201818	0.0217404	0.0379685	0.0321798	0.0319238	0.0550272	0.0595998	0.0517341
	M12		0.000827761	0.00122415	0.00229376	0.00844916	0	0.00319859	0.00222913	0.0039241	0.00296065	0.0193934	0.0172933	0.0176633	0.0314708	0.0315245	0.0344423	0.0540697	0.0606433	0.0494594
	M13		0	0.000267765	0	0.000680596	9.99261e-06	0.000507344	0.00126452	0.00312083	0.000946658	0.0154027	0.0152731	0.0156232	0.0295272	0.0274386	0.0283597	0.0431184	0.049513	0.0479711
	M14		0.00112319	0.000610475	0	0.000120609	0.00330472	0.000186046	0.00105666	0.001661	0.00072602	0.0143707	0.0106411	0.0119828	0.0270139	0.0240689	0.021916	0.0416665	0.0554646	0.0428156
	M15		0	0	0	0	0.000441321	0	0.00023745	0.000975679	0.000672417	0.0100725	0.00959307	0.00936381	0.0201697	0.0186009	0.022461	0.0340765	0.0403973	0.0355903
	M16		0	0	0	3.87088e-05	0	0	0.000157726	0.000565511	0.000117558	0.0078486	0.00576435	0.00749945	0.01901	0.0151699	0.0135275	0.0215005	0.035272	0.0322983
	M17		0	0	0	0	3.35686e-07	4.79005e-05	3.03368e-05	0.000274812	0.00033588	0.00530427	0.00510426	0.00591751	0.0151664	0.0122215	0.0140577	0.0216183	0.0304997	0.0225333
	M18		0	0	0	0	5.42721e-05	0	4.60646e-05	0.000116719	0	0.00443867	0.00373618	0.00362565	0.0111476	0.00932299	0.00871783	0.0106542	0.0201814	0.0159845
	M19		0	3.57333e-07	0	0	0	0	0	2.17963e-05	0	0.00262303	0.00213404	0.00277182	0.00835223	0.00760513	0.00626543	0.00682433	0.0119186	0.0137106
	M20		0	7.13599e-05	0	0	4.41414e-05	0	0	0	0	0.00174088	0.00142185	0.00171552	0.0051113	0.00468992	0.0044682	0.00574132	0.0103881	0.00756671
	M21		0	0	1.97075e-07	0	0	0	0	0	0	0.000757545	0.000705716	0.000263277	0.0038758	0.00319878	0.00280535	0	0.00540013	0.00693866
	M22		0	7.14016e-05	2.13467e-06	0	0	5.71188e-07	0	2.36433e-05	0	0.000729763	0.000710528	0.000127983	0.0023965	0.00203503	0.00244802	0	0.00365984	0.00291296
	M23		0	0.000917483	0.000612752	0	0.000723291	0.000152325	0	0.000341669	0	0.000167163	5.269e-05	0.000558039	0.00145685	0.00103395	0.000838812	0.00121793	0.0014971	0.00181946
	M24		0	0.000146366	0	0	0.000226411	0	0	0	0	0	7.16589e-05	0	0.000698568	0.000560649	0.00034729	0.00036149	0.00131633	0
	M25		0	6.35907e-05	0.000198757	0	4.67241e-07	0	1.40972e-05	2.67258e-05	7.53538e-05	5.4195e-05	0	5.52307e-05	0.000184302	0.000683918	0.00026287	0	0.000632944	0.000455688
PC(36:3)	M0		0.991793	0.994972	0.994278	0.959796	0.972981	0.964963	0.758059	0.700801	0.751093	0.564906	0.573069	0.560824	0.342688	0.326361	0.325947	0.227508	0.207938	0.232391
	M1		0	0	0	0.0131697	0	0.0103999	0.0320731	0.040125	0.0284266	0.0304636	0.0371693	0.030147	0.0266094	0.0241106	0.0223788	0.0205608	0.018243	0.0195573
	M2		0	0	0	0.0099089	0.011018	0.0100445	0.0795679	0.0798985	0.0837543	0.0576814	0.0535726	0.0528034	0.0395671	0.036315	0.0415873	0.0319579	0.0216128	0.0285945
	M3		0	0	0	0	0.00046482	0	0.0291092	0.0341695	0.0299935	0.0425981	0.0432745	0.0471602	0.0390849	0.0399303	0.0391177	0.0364981	0.0314335	0.0326848
	M4		0	0	0	0.00130547	0.000247062	0.00170333	0.0387905	0.0470422	0.0415605	0.0497434	0.0459756	0.0471669	0.0438392	0.0466082	0.0512594	0.0424185	0.0340258	0.035146
	M5		0	0	0	0	0.00017672	0.000127071	0.0160227	0.0226748	0.0151952	0.0346573	0.0352649	0.0362596	0.0437113	0.0418747	0.0436731	0.0482594	0.0457588	0.0425706
	M6		0.000498029	0.000212854	8.01427e-05	0.000256174	0.00350394	0.000237032	0.0171777	0.025858	0.0190603	0.0376842	0.038356	0.0398987	0.0502111	0.0542459	0.0570949	0.0616083	0.0520911	0.0485744
	M7		0.000462905	0.000308926	0.000334347	0.0016819	0.000657858	0.00175816	0.00887205	0.0131147	0.00875135	0.030328	0.0301266	0.0332191	0.0469239	0.0491871	0.049008	0.0616788	0.056739	0.0558601
	M8		0	8.15069e-06	6.92221e-05	0.000112864	0.0010098	0	0.0071094	0.0118683	0.00808555	0.030456	0.0294704	0.0311249	0.0495936	0.0526318	0.0530119	0.0627222	0.0586245	0.0539166
	M9		0	5.25814e-05	0.000476081	0	0	0	0.00384586	0.0070211	0.00417944	0.0241296	0.0212523	0.0234987	0.0419414	0.0441147	0.0456821	0.062303	0.0625908	0.058329
	M10		0.000839765	0.000369094	0	5.63929e-05	0.000671973	0.00016735	0.0030344	0.00602241	0.00365565	0.0224567	0.0211918	0.0216859	0.0439406	0.0458341	0.0454666	0.0562126	0.0571697	0.0571809
	M11		0.000228249	0.000219293	0.000474058	1.60936e-05	0.000544532	0.000193257	0.00159715	0.00327145	0.001674	0.0170742	0.0162714	0.017723	0.0389751	0.0413157	0.0395573	0.0546682	0.0590966	0.0537727
	M12		0.00412516	0.00290938	0.00274738	0.0089292	0.000463771	0.00648317	0.00107191	0.00232428	0.00127708	0.0143279	0.0127097	0.0146424	0.0360063	0.0365465	0.0362248	0.0426377	0.0537786	0.0504128
	M13		0.000409474	0.000557152	0.000661693	0.0011953	0	0.000861333	0.000643688	0.00131682	0.000811348	0.0117904	0.011707	0.0123948	0.0321898	0.0357617	0.034286	0.0471896	0.0498638	0.0438852
	M14		0.000998379	2.3537e-05	0	8.51913e-05	0.00488661	0	0.00031459	0.000929682	0.000552034	0.0096217	0.00902073	0.0088528	0.0296307	0.0293124	0.0272353	0.0362381	0.0450791	0.0388959
	M15		0	9.68945e-06	0.000118874	0	0	0	0.000304332	0.000530866	0.000116797	0.00688407	0.00697851	0.00694306	0.0239582	0.0244127	0.0235512	0.0268715	0.0387322	0.035115
	M16		0	0	0	0	0	0	2.80685e-05	0.00032873	0.000213868	0.00535636	0.00502183	0.0049959	0.0200457	0.0212565	0.0189806	0.0256635	0.0294123	0.0312994
	M17		0	0	0	6.12763e-06	8.39416e-05	0	5.67689e-06	0.000187403	0	0.00339482	0.00322422	0.003872	0.0157808	0.0154938	0.0142012	0.0186269	0.0268453	0.0242875
	M18		0.000644704	0.000155269	0.00014649	0.00344387	0.000427215	0.0030616	0.00228632	0.00232265	0.00148533	0.00281424	0.0027573	0.00288571	0.01233	0.0121131	0.0113375	0.0137678	0.0173387	0.0184405
	M19		0	0	1.31343e-05	0	0.00236581	0	8.66872e-05	0.000141385	0.000114131	0.00135177	0.00160764	0.00182067	0.00845466	0.0079332	0.00765438	0.00866517	0.0130115	0.0137044
	M20		0	4.89908e-06	0	0	0	0	0	0	0	0.00129025	0.00100908	0.00113135	0.00602619	0.0057858	0.00583824	0.00587727	0.00865639	0.00989522
	M21		0	0	0	0	0	0	0	0	0	0.00054369	0.000545639	0.00042789	0.00354072	0.00376555	0.00284178	0.00403181	0.00462351	0.00708631
	M22		0	0	0	0	2.70718e-05	0	0	0	0	0.00025718	0.000292744	0.000304269	0.00216314	0.00206849	0.00187905	0.00220286	0.00399452	0.00397474
	M23		0	1.72795e-08	0	0	0	0	0	0	0	0.000189335	0	0.000123747	0.00131914	0.00145048	0.0012381	0.00151683	0.00194401	0.0024786
	M24		0	3.98317e-07	0	0	5.95447e-05	0	0	0	0	0	2.07647e-05	6.81054e-05	0.000914443	0.00092251	0.000615526	0.000198822	0.00110504	0.0014414
	M25		0	0.000196296	0.000586133	0	0.000400592	0	0	3.41993e-05	0	0	2.8168e-05	0	0.000369752	0.000480321	0.000207243	0	7.87259e-05	0.000438298
	M26		0	0	1.44951e-05	3.69685e-05	9.33396e-06	0	0	1.67592e-05	0	0	8.17107e-05	2.57326e-05	0.000184967	0.000167526	0.000125345	0.000116515	0.000212542	6.66655e-05
PC(36:4)	M0		0.985723	0.980136	0.982772	0.894442	0.903071	0.899079	0.606711	0.519484	0.594649	0.373576	0.348307	0.320457	0.278944	0.247117	0.247614	0.128478	0.114193	0.14896
	M1		0	0	0	0.0220726	0	0.0177163	0.0542974	0.057371	0.0558902	0.02846	0.0302531	0.0368131	0.0179634	0.0166626	0.0209527	0.0170842	0.0146607	0.0188729
	M2		0	0	0	0.0116721	0.0125669	0.011485	0.133514	0.13844	0.129429	0.0703227	0.0694498	0.071989	0.0352452	0.0334431	0.0380079	0.0268173	0.0189166	0.0233895
	M3		0	0	0	0	0.000736727	0.000517254	0.0376141	0.0490088	0.0411477	0.0551168	0.0580551	0.0594023	0.0390203	0.0393528	0.0395608	0.037477	0.0304819	0.0328194
	M4		0	0	0	0.000674627	0.00126096	0.000672324	0.0550068	0.0680988	0.0581904	0.0744196	0.0771573	0.0783687	0.0501296	0.0503313	0.0517646	0.0460867	0.0362835	0.0364696
	M5		0	0	0	0.000490477	0.000395001	4.8784e-05	0.0192704	0.0327994	0.0221739	0.0595277	0.0609191	0.0617603	0.0515653	0.0524742	0.0545958	0.054962	0.0470549	0.0459946
	M6		1.89658e-05	0	3.66938e-05	0	0.000507042	0.000237303	0.0204114	0.031601	0.0222921	0.0633985	0.0691688	0.0688264	0.0587937	0.0626633	0.0651018	0.0620744	0.0547488	0.0540076
	M7		1.54794e-05	7.33882e-06	1.85097e-05	6.16318e-05	0.000201706	0	0.00885895	0.0148245	0.00937967	0.048734	0.0525693	0.058126	0.0558498	0.0578113	0.0564671	0.0648601	0.0625365	0.0592449
	M8		0	1.28138e-05	0	1.38201e-05	0.000786919	6.39668e-05	0.00727778	0.0133735	0.0092835	0.0470594	0.0492087	0.0488634	0.0600479	0.0640978	0.0651829	0.0666924	0.061513	0.0588064
	M9		9.32681e-07	4.70396e-05	9.52565e-05	0	0.000113904	0	0.0033957	0.00652233	0.00356737	0.0347071	0.0381492	0.0421973	0.0539126	0.0563319	0.0564239	0.0641758	0.0635836	0.0606972
	M10		0.000463504	0.000402729	0	0.00188515	0.00355234	0.00133496	0.00243388	0.00524749	0.0028794	0.0304286	0.0335531	0.0348228	0.0492848	0.0546499	0.05102	0.0657768	0.0627814	0.0581702
	M11		0	1.27335e-05	7.8631e-05	0.000148965	0.000260749	0	0.000995123	0.00230192	0.00155019	0.0240272	0.0267869	0.0278537	0.045403	0.0457698	0.0469062	0.0626239	0.0686651	0.060367
	M12		0.00446902	0.0036762	0.00354133	0.0122339	0.024445	0.00837894	0.000925369	0.00192713	0.00141701	0.0190763	0.0216124	0.0223358	0.0398763	0.0437651	0.041577	0.0604713	0.0647796	0.0539439
	M13		0.000354443	0.00033987	0.000839636	0.000883592	0.0024508	0.000810461	0.000583719	0.00107187	0.000597943	0.0151761	0.017291	0.0164517	0.0354706	0.0381319	0.0361906	0.0531365	0.059538	0.0542888
	M14		0.000280805	3.21953e-05	0	0.000157558	0.00151177	0.000169132	0.000928135	0.00064027	0.000214313	0.0108147	0.0125786	0.0150043	0.0303428	0.0325616	0.0323325	0.0476136	0.055525	0.0494049
	M15		0	0	0	0	0	0	0.000214995	0.000333739	0.000261393	0.00819242	0.00950923	0.00966402	0.0263556	0.0284842	0.0267086	0.0395294	0.0460225	0.0436317
	M16		0	6.78152e-06	0	0	0	0	8.63679e-05	0.000255075	0.000102118	0.00624502	0.00716457	0.00786833	0.0200237	0.0217641	0.0211365	0.0301347	0.0408685	0.0378767
	M17		0	1.85332e-05	1.8319e-05	0	0	0	0	0.000144466	0	0.00407701	0.00512248	0.00541828	0.0166826	0.0170684	0.0157062	0.0241298	0.0315637	0.0305075
	M18		0	1.12628e-05	2.52113e-05	1.22371e-05	2.60349e-05	3.17083e-05	4.00719e-07	3.28111e-05	1.86309e-05	0.00277877	0.00308894	0.00365259	0.0120052	0.0132028	0.0117203	0.0171955	0.0223636	0.0231229
	M19		0	0	0	7.01119e-05	0	3.33241e-06	0.000100566	5.24361e-05	0	0.0018711	0.00221219	0.00234226	0.00827554	0.00908881	0.00801203	0.0122248	0.0168702	0.0178444
	M20		0	0	0	1.30949e-05	0.000358769	6.03379e-06	0	0	0	0.0010859	0.00138402	0.00128446	0.00588242	0.00622876	0.00554356	0.00797723	0.0108442	0.0114043
	M21		0	0	3.37335e-05	1.46832e-05	5.39932e-05	0	0	0	0	0.000857186	0.000955508	0.000844714	0.00392221	0.00373873	0.00336146	0.00435825	0.00724854	0.00790051
	M22		0.0016067	0.0124879	0.00922471	0.0435964	0.0379281	0.0465329	0.0271092	0.0360564	0.0307971	0.000427234	0.000476488	0.000512378	0.00206405	0.00251395	0.00188095	0.0031272	0.0040266	0.0057442
	M23		0.0070667	0.00246273	0.00285089	0.0100125	0.00865518	0.0113001	0.0124663	0.0106011	0.00896958	0.0144528	0.000287373	0.00026423	0.00148618	0.00155006	0.00121588	0.00169883	0.00272814	0.00308749
	M24		0	0.000345458	0.000382265	0.00154445	0.00111322	0.00161205	0.00779805	0.00981187	0.00718993	0.00516811	0.00473931	0.00487639	0.000728211	0.000558879	0.000591526	0.000688434	0.00122178	0.0016523
	M25		0	0	0	0	0	0	0	0	0	0	0	0	0.000400754	0.000397938	0.000279816	0.00043755	0.000753453	0.000988966
	M26		0	0	0	0	0	0	0	0	0	0	0	0	0.000274719	0.000204956	0.000130525	9.09811e-05	0.000201207	0.000516553
	M27		0	0	8.24492e-05	0	4.02105e-06	0	0	0	0	0	0	0	4.90285e-05	3.5024e-05	1.53508e-05	7.72167e-05	2.64968e-05	0.00028534
PC(36:5)	M0		0.998046	0.997982	0.998516	0.991754	0.974557	0.987721	0.711996	0.645616	0.69713	0.362022	0.339968	0.342342	0.25657	0.234056	0.240688	0.126213	0.108848	0.127279
	M1		0	0	0	0	0.00438057	0	0.0421226	0.0444641	0.0415857	0.0419547	0.0411814	0.0379213	0.0227811	0.021835	0.0206879	0.0149522	0.0133714	0.0155407
	M2		0	0	0	0.00411454	0	0.00804772	0.132319	0.143209	0.132382	0.0813581	0.081288	0.0837574	0.0470761	0.0457597	0.0482336	0.030047	0.0226818	0.0245333
	M3		0	0	0	0	0	0	0.0267846	0.0374208	0.0298248	0.0688224	0.0644352	0.0648181	0.0479855	0.0483488	0.0487642	0.0384286	0.0313899	0.0323449
	M4		0	0	0	0	0.000775197	0	0.0443644	0.0546906	0.0487503	0.0831797	0.0846552	0.0830989	0.0632263	0.0646557	0.0669345	0.0516234	0.0400885	0.0427228
	M5		0	0	0	0	0.000540358	0	0.0133746	0.0209853	0.0152216	0.0642637	0.0673831	0.0662197	0.0609049	0.0632239	0.0624625	0.0592333	0.0509439	0.0484324
	M6		0	0	0	0	0.000395345	5.51703e-05	0.013516	0.0209402	0.0150424	0.0625044	0.0655638	0.0710111	0.0747324	0.0752187	0.0753792	0.0663531	0.0605157	0.062314
	M7		0	0	0	8.90899e-05	0.000288302	7.38393e-05	0.00450288	0.00873437	0.00631475	0.0523756	0.0526553	0.0536587	0.0653102	0.0641026	0.0642303	0.0675725	0.0630765	0.0645118
	M8		6.78613e-05	3.55919e-05	0	0.000667072	0.00111787	0.000628367	0.00417793	0.0068577	0.00475033	0.0454085	0.0480029	0.0486118	0.0632874	0.0668283	0.0650052	0.0663101	0.0681126	0.0641067
	M9		4.09443e-05	8.00327e-06	1.16507e-05	0.000148567	0.000381612	7.05505e-05	0.00158271	0.00365797	0.00219053	0.0308631	0.0338603	0.0346671	0.0535324	0.0565184	0.0568438	0.066924	0.0644908	0.0638082
	M10		0.000381653	0.000769412	0.000782592	0.00116913	0.0029876	0.00139426	0.0015535	0.00288963	0.00196777	0.0289921	0.0305185	0.0312598	0.0482963	0.0505434	0.0501367	0.0605805	0.065153	0.0604761
	M11		0	0	0	0	0	0	0.000391636	0.000960812	0.000560786	0.0203394	0.0226249	0.0223799	0.0398878	0.0432153	0.0411823	0.0579592	0.0629591	0.0566886
	M12		0	0	0	0	0	0	0	0.000225758	0	0.0128501	0.0140744	0.0129534	0.0311595	0.0292991	0.0309741	0.0544277	0.0554444	0.0527965
	M13		0	0	0	0	0	0	0	0.000188463	0.000374151	0.0105927	0.0119126	0.0122835	0.0272303	0.0314936	0.0297604	0.0503039	0.0552908	0.0513055
	M14		0	0	0	0	0	0	0	0	0	0.008756	0.0103533	0.0108632	0.0243083	0.0258543	0.0252459	0.0447361	0.0527746	0.0480475
	M15		3.72604e-06	3.0068e-06	1.51916e-06	1.37966e-05	4.80131e-05	6.95857e-06	5.97262e-06	0	0	0.0065161	0.00704336	0.00644522	0.0201372	0.0219139	0.0195731	0.0376159	0.0459905	0.0426832
	M16		0.000380197	0.000289608	0.000180435	0.00164736	0.00464799	0.00103217	0.0011725	0.00130233	0.00112352	0.00388415	0.00472099	0.00512035	0.0149867	0.0172912	0.0152844	0.0310466	0.0379916	0.0369036
	M17		0	0	0	0	0	0	0	0	0	0.0031306	0.00340659	0.00344878	0.0112482	0.0113235	0.0120545	0.0233904	0.0309148	0.0297585
	M18		1.89073e-05	1.11809e-05	0	5.16896e-05	8.92351e-05	0.000109896	0.0002831	0.000446043	0.000347631	0.00202691	0.00211069	0.00231807	0.00844277	0.00928327	0.00850772	0.0183552	0.0211696	0.0228507
	M19		0	0	8.13269e-06	5.32259e-06	6.7973e-05	0	4.93766e-05	0.000102268	0	0.00102713	0.0014455	0.00149327	0.00611059	0.00652838	0.00635523	0.012369	0.0166976	0.018406
	M20		2.53846e-05	2.34517e-05	2.42092e-05	1.87926e-05	0.00067754	5.74012e-05	9.92555e-06	8.00215e-05	5.64927e-05	0.000709635	0.000939312	0.00091521	0.00382622	0.00406511	0.00386323	0.00736176	0.0112056	0.0132823
	M21		0	0	0	0	3.4728e-05	0	9.50914e-06	1.4496e-05	1.83377e-06	0.000472609	0.000398804	0.00050571	0.00282672	0.00275491	0.00278047	0.00514243	0.00745389	0.00852588
	M22		4.95281e-05	5.70902e-05	4.39446e-05	0	1.4423e-05	2.5724e-05	5.83075e-05	6.64603e-05	5.35351e-05	0.000268043	0.000379927	0.000114245	0.00146119	0.00157637	0.00118748	0.00276291	0.00427315	0.00551283
	M23		0	0	0	0	5.65148e-05	5.24682e-05	3.34059e-06	5.29861e-06	0	0.000847386	0.00039439	0.00080861	0.000954594	0.00102554	0.000879694	0.00202471	0.00256851	0.00320853
	M24		1.02072e-05	4.20812e-05	0	7.33462e-06	0.000303313	3.68572e-05	1.08792e-05	8.55975e-06	9.71999e-05	0.000447205	0.000459462	0.000412597	0.000484847	0.000409986	0.000526507	0.000871559	0.00159139	0.00194101
	M25		1.12391e-05	3.24e-05	0	0	0	0	0	0	0	0.000247158	0.000263635	0.00024836	0.000306677	0.000214102	0.000256245	0.000399926	0.000579365	0.00126536
	M26		0.000964574	0.000746301	0.000333201	0.000284914	0.00863612	0.000687765	5.2588e-05	0.00345804	0.000284722	0.000319273	0.00654962	1.10699e-05	0.000121087	9.25822e-05	0.000891227	0.000196884	0.000205703	0.000539086
	M27		0	0	9.80849e-05	2.84021e-05	0	0	0.0016583	0.00367581	0.00194031	0.00582161	0.00341114	0.00231244	0.00280446	0.00256861	0.00131159	0.00279844	0.00421688	0.000214744
PC(36:6)	M0		0.992881	0.989117	0.992987	0.996535	0.989527	0.996828	0.866676	0.827571	0.850805	0.511863	0.496803	0.496425	0.334716	0.315745	0.329642	0.153791	0.13942	0.15311
	M1		0	0	0	0	0	0	0.0176521	0.0117539	0.013706	0.0412359	0.0476113	0.0496704	0.0301706	0.025524	0.0256494	0.0202417	0.0159256	0.0177659
	M2		0	0	0	0	0	0	0.0732221	0.093733	0.0814894	0.09828	0.0901609	0.08725	0.0628177	0.0587742	0.0609262	0.030162	0.0261721	0.0246808
	M3		0	0	0	0	0	0	0.0115484	0.0156917	0.0141574	0.0553686	0.0547195	0.0587952	0.0558775	0.0531896	0.0541011	0.0373998	0.032254	0.033936
	M4		0	0	0	0	0	0	0.016151	0.0283276	0.0211566	0.0716501	0.0722962	0.0649681	0.0656006	0.0679782	0.0668643	0.046928	0.0409803	0.0375018
	M5		0	0	0.000123183	0	0.000180841	0	0.00461993	0.00582871	0.00511433	0.0446928	0.0463057	0.0483637	0.0566064	0.0539347	0.0554662	0.0547522	0.0485399	0.0484504
	M6		0.000133816	0.000336231	8.66386e-05	9.90933e-05	0.000423232	7.1601e-07	0.00485196	0.00780981	0.0063412	0.0474826	0.04953	0.0476114	0.0671054	0.0682992	0.0682346	0.0651536	0.0575868	0.0571138
	M7		0	0	0	0	0.000155335	3.64853e-06	0.00169984	0.00214777	0.00249011	0.0307877	0.0346896	0.0346306	0.0531671	0.0563109	0.0546601	0.065506	0.0621256	0.0610755
	M8		0.000952543	0.00159346	0.00104836	9.1606e-06	0.000410248	8.0952e-05	0.0010681	0.00266625	0.00151501	0.0269309	0.0269657	0.0299001	0.0531912	0.0562295	0.0545962	0.0662024	0.0663107	0.0627057
	M9		8.8764e-06	9.96139e-05	5.8842e-05	0	0	0	0.000547861	0.00109036	0.00107653	0.0204374	0.0211267	0.0219595	0.0434117	0.0448894	0.0431839	0.0629829	0.0628885	0.0617897
	M10		0	0.000298006	0.00205846	0	0.000141191	0	0.000406013	0.000626995	0.00036147	0.0142608	0.0177554	0.0174398	0.0374192	0.0405233	0.0379725	0.0578458	0.0608735	0.0586717
	M11		0	3.63091e-05	7.23689e-05	7.96795e-06	0	0	0	0.000325373	0.000181181	0.0105995	0.010942	0.0108136	0.0301709	0.0344108	0.0328305	0.0548354	0.0570399	0.0543977
	M12		0.000904793	0.00135216	0.000573091	0.00111104	0.00515745	0.000723266	0.000588215	0.00133667	0.000386098	0.00813333	0.0092098	0.0094133	0.0256805	0.028396	0.0261269	0.0501206	0.0556714	0.0512865
	M13		7.08176e-05	0.000150034	0	7.51063e-05	0.000134417	1.36672e-05	0	2.99919e-05	0.000114233	0.00581841	0.00666059	0.00648299	0.0209061	0.0233076	0.0221651	0.0455939	0.0506002	0.0475353
	M14		0.0020757	0.00286272	0.00131892	0.000918339	0.0014029	0.000861188	0.000233416	0.000209039	0.000364572	0.00392316	0.00534679	0.00540088	0.0156297	0.0190538	0.0180918	0.0417284	0.0468516	0.0437668
	M15		0.000286897	0.00029545	0	0	0	0	0	2.08699e-05	4.41143e-05	0.00304685	0.00308874	0.00339476	0.0140204	0.0151744	0.0143717	0.0358033	0.0403833	0.038545
	M16		0	0	1.86359e-06	0	0	0	5.08973e-05	4.85247e-05	0	0.00226707	0.00258252	0.00261715	0.0102076	0.0118745	0.010661	0.0304874	0.0363844	0.0356281
	M17		0	0	0.0002254	0	3.52301e-06	4.25642e-06	0	1.4277e-05	5.74891e-06	0.00130387	0.00165345	0.0017687	0.00756913	0.00837354	0.0078414	0.0236512	0.0300201	0.029673
	M18		0	0	9.46583e-06	0	4.59738e-05	0	0	0	8.30667e-06	0.000717345	0.000998527	0.00127846	0.00572766	0.00697158	0.00615103	0.0198836	0.0230654	0.0240491
	M19		3.67513e-05	0	0	1.67694e-05	8.92813e-05	0	1.06664e-06	3.13214e-06	0	0.000598038	0.000656119	0.000547668	0.00364574	0.00383634	0.00412045	0.0130248	0.0166058	0.019295
	M20		0.0002825	0.00022758	3.9846e-05	0.000243805	0.00047386	0.000235361	0.000106958	8.60086e-05	0.000139347	0.000233286	0.000440795	0.000478667	0.00260274	0.00271885	0.0024758	0.00938093	0.0114299	0.0141867
	M21		9.45322e-08	2.31849e-06	2.53859e-05	0	7.79073e-05	1.02767e-05	6.96992e-06	0	0	0.000149698	0.000149304	0.000314002	0.00146295	0.00175076	0.00147979	0.00597773	0.00814898	0.00922422
	M22		0.000576694	0.000867002	0.000496532	0.000290049	0.000255273	0.000400066	0.000186218	0.000136859	0.000158754	9.64062e-05	0.000168473	0.00021325	0.00104432	0.00109451	0.00106755	0.00376687	0.00473328	0.00624066
	M23		0.000139914	0.000173034	3.14061e-05	8.88547e-05	1.67095e-05	1.20418e-05	4.20292e-05	4.36278e-05	4.75596e-05	6.25766e-05	0	0	0.000461856	0.000535013	0.000460357	0.00236173	0.00292124	0.00441799
	M24		0.00114215	0.00187364	0.000623471	0.000256342	0.000352756	0.000635064	0.000199432	0.000366068	0.000205701	4.97659e-06	3.70637e-05	1.83135e-05	0.000408716	0.000414029	0.000197211	0.00120154	0.0016017	0.00246329
	M25		0.000252151	0.000434276	0.000219566	0.00015833	5.97248e-05	4.05638e-05	5.74301e-05	8.08439e-05	4.7734e-05	1.70733e-05	3.673e-05	1.52193e-05	8.89925e-05	0.000113318	0.000107897	0.000878258	0.000830354	0.00132001
	M26		0	3.47655e-05	0	7.66807e-05	0.000389239	3.40339e-05	3.78449e-05	5.1742e-05	5.58998e-05	3.56335e-05	1.56344e-05	1.98946e-05	7.55026e-05	8.70918e-05	8.42184e-05	0.000250517	0.000416465	0.000815873
	M27		0.00025555	0.000246241	0	0.000113501	0.000703185	0.000116768	4.61974e-05	0	2.75827e-05	2.4983e-06	4.91532e-05	0.000209089	0.000214086	0.000489824	0.00047112	8.80302e-05	0.00021881	0.000353932
PC(38:2)	M0		0.991986	0.955798	0.912782	0.950809	0.91642	0.938657	0.600789	0.559673	0.608961	0.331886	0.375156	0.357381	0.261756	0.286165	0.318211	0.0985034	0.087347	0.112349
	M1		0	0	0	0	0	0	0.0381763	0.027807	0.0284926	0.0210228	0.0154024	0.020889	0.0228937	0.00453165	0	0	0.000272071	0
	M2		0	0	0	0.0355382	0.025688	0.0344798	0.122908	0.104669	0.11053	0.0453463	0.0454341	0.0328646	0.0125424	0.0274488	0.0303439	0.00982201	0.0132337	0.00855343
	M3		0	0	0	0.00402739	0	0.00660481	0.0410345	0.0418609	0.0517388	0.037899	0.0389235	0.0365002	0.0313884	0.0217338	0.0198929	0.0239727	0	0.0124121
	M4		0	0	0	0	0	0.000863472	0.0674629	0.0711276	0.0548398	0.0531552	0.0484406	0.0463846	0.0270822	0.0277252	0.0337574	0.0104349	0.0260276	0.00897711
	M5		0	0	0	0.00129799	0	0.000621716	0.032108	0.0342009	0.034973	0.0476824	0.0461281	0.0473046	0.0358088	0.0341825	0.0296267	0.0224624	0.0379378	0.0323039
	M6		8.84509e-05	0.000421864	0.0140357	0	0	0	0.0318773	0.0400903	0.0329897	0.0582617	0.0504953	0.0543912	0.039965	0.0450831	0.0443906	0.0209746	0.037095	0.0380528
	M7		0	7.63008e-05	0	0.000420457	0.00166206	0	0.0199018	0.026534	0.0187862	0.0545478	0.0529246	0.0465457	0.0447579	0.0536665	0.0567309	0.069882	0.0475571	0.0526066
	M8		5.05061e-06	0.00068007	0	0	0.00109319	0	0.0145131	0.0231736	0.0147935	0.0544359	0.0459556	0.0525712	0.0508989	0.0433081	0.0328394	0.071711	0.0544535	0.0569037
	M9		0.000469433	0.00685924	0.0137944	0	0	0.000200256	0.00962066	0.015572	0.0116547	0.0487884	0.0492198	0.0525908	0.0420937	0.0574634	0.0611644	0.0945164	0.0716662	0.0694449
	M10		0	0	0.00858023	0	0	0	0.00754392	0.0120252	0.008839	0.0475652	0.041424	0.0405298	0.0573445	0.0466583	0.0431101	0.0883582	0.0743296	0.0648577
	M11		0	0.0244618	0	0	0.00206984	0.00971276	0.00358492	0.00820686	0.00618755	0.0408705	0.0403816	0.0409336	0.0496994	0.0519375	0.052483	0.0933173	0.0772717	0.0801467
	M12		0.00569877	0.00535889	0.00279437	0.00545076	0.0161243	0.00254805	0.00696764	0.0092222	0.00972364	0.0406269	0.0389938	0.0480351	0.0610951	0.0467772	0.0444143	0.0955458	0.0864616	0.0672926
	M13		5.54021e-05	0	0	0.000538043	0.000982542	0	0.0017877	0.00504523	0.00245832	0.0307869	0.0304407	0.0289738	0.0545549	0.0534976	0.0585089	0.0658738	0.0724618	0.0778186
	M14		0	7.80104e-05	0	0	0.002882	0	0	0.00142468	0.000858842	0.0240865	0.0243014	0.0264979	0.0392201	0.0470437	0.0362232	0.0706418	0.0718863	0.0766155
	M15		0	0.000283232	0.0444072	0	0.000774415	0	0.000348236	0.00111006	7.58818e-05	0.0188423	0.021134	0.0228786	0.0470735	0.0408232	0.0478721	0.0300012	0.0666835	0.0676295
	M16		0.000183936	0	0	0.00191823	0	0	0.00096901	0.000672602	0.00136993	0.0152986	0.0137934	0.0130352	0.037923	0.0307545	0.0274414	0.0758085	0.0481675	0.0514511
	M17		0.00118524	0	0	0	0.000496464	0.000243682	0.000370015	0.000360323	0	0.00901915	0	0.0104058	0.0280329	0.0288029	0.0228897	0.0150086	0.0407685	0.0322628
	M18		0	0.000401192	0.00233383	0	0.00147166	0	0	0	0	0.00922278	0.0118334	0.00644184	0.0270358	0.0212914	0.0217935	0.0295431	0.0366089	0.0288865
	M19		0.000233032	0.00558151	0	0	0.0222416	0.00606857	3.64913e-05	0.0158254	0.00271734	0.00457198	0.00494916	0.00994587	0.0101789	0.00745838	0.00596797	0	0.0225152	0.0351572
	M20		9.49987e-05	0	0	0	0.00809436	0	0	0.00121896	0	0.00297828	0.00346574	0.00305808	0.0100136	0.0134827	0.00551643	0.0130458	0.015099	0.0153195
	M21		0	0	0	0	0	0	0	0.000180119	9.60431e-06	0.00251174	0.00120275	0.00153128	0.00539837	0.00577175	0.00682202	0.00057637	0.00699495	0.00631679
	M22		0	0	0.00127182	0	0	0	0	0	0	0.0005936	0	0.000310598	0.0032434	0.00439269	0	0	0.00516145	0.00464255
PC(38:3)	M0		0.996704	0.99051	0.960296	0.987183	0.959943	0.98967	0.657321	0.596111	0.659351	0.321753	0.325554	0.315372	0.201812	0.18951	0.196099	0.103688	0.0944287	0.0996351
	M1		0	0	0	0	0.00365897	0	0.0445227	0.0461152	0.0385944	0.030094	0.0303033	0.0313718	0.0130741	0.00963111	0.00922689	0.011643	0.00868816	0.00893202
	M2		0	0	0	0.011081	0.0103469	0.00588329	0.121184	0.123128	0.120851	0.0617375	0.057745	0.0593858	0.0304881	0.0301063	0.0309782	0.0308955	0.0148084	0.0165726
	M3		0	0	0	0	0	0.000500056	0.0391608	0.0474681	0.0350158	0.0529887	0.0502118	0.0444304	0.0313215	0.0255931	0.0342307	0.0208413	0.0222704	0.0233159
	M4		0	0	0	0.000450486	0.00101807	0.00198706	0.0538015	0.0633252	0.0557335	0.0605447	0.0581998	0.0661006	0.0411799	0.0430127	0.0382277	0.0296279	0.0246279	0.0274185
	M5		0	0	0	0.000151773	0.000330587	0	0.0247721	0.0302061	0.0256317	0.0553586	0.0565453	0.0512788	0.0419111	0.0414642	0.0505802	0.0467457	0.0362766	0.0309754
	M6		0.000544047	0.000198881	0	0.000173416	0.00343583	0.000134886	0.0223972	0.0337464	0.0249813	0.062588	0.059162	0.0596465	0.0536436	0.0507247	0.0518895	0.0495046	0.0468567	0.0470312
	M7		0	5.35125e-05	0.000273236	0	0	0	0.0117507	0.0167298	0.0121834	0.0544508	0.0522254	0.0549258	0.0541508	0.0569581	0.0585535	0.0618078	0.0509398	0.0555307
	M8		1.98233e-05	0	0	0	0	0	0.00967716	0.0155537	0.0105986	0.0512723	0.0507673	0.0535241	0.0613542	0.0628761	0.0557603	0.0602932	0.0584439	0.0532301
	M9		8.38555e-05	0	0	0	0	0	0.0057306	0.00902121	0.00560342	0.0475548	0.0474552	0.0463637	0.0549711	0.056549	0.0654323	0.0728303	0.0659768	0.060799
	M10		4.07228e-05	0	0	0	0.000270495	0	0.00447964	0.00722141	0.00516405	0.0415509	0.0420461	0.0450301	0.0586867	0.0644383	0.0566589	0.0634767	0.0658276	0.065754
	M11		0.00025961	0.00376654	0.0123125	2.39633e-06	0.000286335	0.000308159	0.00171111	0.00379936	0.00216048	0.0348663	0.0362259	0.0350664	0.0551555	0.0580721	0.0544405	0.0707018	0.0678805	0.0700247
	M12		0.000864799	0.00104901	0.000789109	9.9033e-05	0.00149448	0.00020699	0.0014427	0.00324243	0.00099458	0.0306697	0.0313878	0.0328823	0.0552287	0.0551191	0.0590035	0.0588033	0.0750451	0.0635631
	M13		0.000310775	0.00102388	0.0013419	0	0.0102676	0.000719129	0.001019	0.00176607	0.00151828	0.0223748	0.0260812	0.0277504	0.0504249	0.0529402	0.0478677	0.0712449	0.0689687	0.0612437
	M14		0	0.000335609	0	0	0.00485394	0.000104522	0.000569374	0.00119177	0.000872902	0.0218435	0.0216351	0.0203706	0.041371	0.0466035	0.0428571	0.0579552	0.0626478	0.0658114
	M15		0	0.000574319	0.000671319	2.21757e-07	1.55424e-05	0	9.87305e-05	0.000504616	9.7045e-05	0.0158525	0.0169259	0.0159194	0.0388948	0.0372639	0.0375061	0.0530879	0.0585538	0.0522454
	M16		4.64542e-06	0.000119348	0	0.000571083	0	0.000183341	9.36176e-05	0.000310583	0	0.010404	0.0119491	0.0142406	0.0335106	0.0332485	0.0300074	0.0422755	0.0455976	0.0525271
	M17		0.000751815	0.000778999	0.0174066	0	0.000637128	0	0.000174432	0.000471906	8.64263e-05	0.00825277	0.00952044	0.0101076	0.0235846	0.0255637	0.0240498	0.0332669	0.0395887	0.0398809
	M18		0	5.50323e-05	0.00145041	0.000126165	0.000980629	0	1.73406e-05	0	0.000200055	0.0060739	0.00608197	0.0059562	0.0199044	0.0203995	0.0185559	0.0238224	0.0300338	0.0334625
	M19		0	0	0.000597017	0	0.000339318	0	0	0	0	0.00418277	0.00445385	0.00414028	0.0129576	0.0139423	0.0133584	0.0177077	0.0219823	0.0259851
	M20		0	0.000257871	0.00139235	0	0	6.13507e-07	0	0	0	0.00234757	0.00254396	0.00313299	0.010017	0.00976061	0.00963126	0.0061966	0.015411	0.018061
	M21		0	0	9.03563e-05	0	0.00176876	0.000109216	0	4.83382e-05	0	0.00140623	0.00170317	0.00142378	0.00618892	0.00634302	0.00694547	0.00701965	0.010636	0.0112418
	M22		2.70782e-07	2.61468e-05	0	1.75371e-07	0.000200265	0	0	4.34507e-06	0	0.00106866	0.000828812	0.00100165	0.00525034	0.00445478	0.0039867	0.00371561	0.00724015	0.00706535
	M23		7.00213e-05	0.000315571	0.00210012	5.91853e-05	0	0	0	0	8.82891e-08	0.000406635	0.000447416	0.000333623	0.00236213	0.00244503	0.00189919	0.00203193	0.00445282	0.00499641
	M24		0	0	0	0	5.00101e-05	0	0	0	1.26564e-06	0.000119616	0	1.52513e-05	0.00104192	0.00173077	0.000866984	0.00033366	0.0018567	0.00270597
	M25		0.000342033	0.000868069	0.00124426	0	0	0.000193022	0	2.01937e-05	0.000360157	0.000218443	0	0.00021662	0.00099901	0.000992793	0.00118024	0.000482907	0.000960167	0.00199113
	M26		3.08566e-06	6.72013e-05	3.44951e-05	0.000101791	0.000102141	0	7.60742e-05	1.44319e-05	0	1.93839e-05	0	1.23797e-05	0.000515346	0.000256639	0.000206294	0	0	0
PC(38:4)	M0		0.996527	0.996116	0.980808	0.993409	0.968011	0.994458	0.773713	0.725986	0.75066	0.348571	0.358508	0.343218	0.200322	0.182739	0.18787	0.0983695	0.0889572	0.0963014
	M1		0.000176419	0	0	0	0.00489717	0	0.0371281	0.0372226	0.0380976	0.0400985	0.0401301	0.032299	0.0171078	0.0165699	0.0177367	0.0110428	0.00988702	0.00972517
	M2		0	0	0	0.000255325	0.00181178	0	0.0928582	0.101736	0.0984809	0.0860257	0.0863596	0.0856218	0.0405645	0.0395684	0.039996	0.0191362	0.0154267	0.0163837
	M3		0	0	0	0	0	0	0.0260631	0.0330968	0.0288134	0.0621037	0.0558178	0.0601767	0.043806	0.0392483	0.0391961	0.0285575	0.0223219	0.0233058
	M4		0	0	0	0	0.000546954	0	0.033619	0.0444063	0.0377971	0.0797873	0	0.0771539	0.0557268	0.0589168	0.0582383	0.0366497	0.0313724	0.0323147
	M5		0	0	0	9.16486e-05	0.0103413	0.0003667	0.0113763	0.0181795	0.0139164	0.0643287	0.103457	0.0639176	0.0597854	0.0570932	0.0575153	0.0472708	0.0388671	0.0382037
	M6		0	0	0	0	0	0	0.0122231	0.0159567	0.0147984	0.0647244	0.0610352	0.0619509	0.0668274	0.0672278	0.0695779	0.0634434	0.05273	0.0531758
	M7		0	0	0	5.76787e-05	0	0	0.00369739	0.0082844	0.00612287	0.0519699	0.0582875	0.0544057	0.0647447	0.0625575	0.0665798	0.0589664	0.0583323	0.056043
	M8		0	1.41749e-06	0	0	0	0	0.00328368	0.00610163	0.00519772	0.0461776	0.0519587	0.048919	0.0655687	0.0659033	0.0647613	0.0705769	0.0633966	0.063569
	M9		1.60569e-06	6.61596e-05	0.000286707	0	2.17229e-05	2.92483e-05	0.00201644	0.00339472	0.00230984	0.035619	0.0417668	0.0368856	0.0604501	0.0615659	0.0606335	0.0641595	0.0657789	0.0656439
	M10		5.7906e-05	0	0	4.72144e-05	0.000199904	0	0.00131665	0.00250046	0.00206765	0.0304747	0.0326575	0.0325537	0.0547622	0.061816	0.059686	0.0660314	0.0674973	0.0611145
	M11		0	1.43391e-05	0.00014594	0	0	8.72916e-05	0.00047649	0.00142997	0.000625282	0.0239301	0.0290395	0.0270673	0.0536646	0.0520094	0.0529924	0.0714928	0.0654208	0.0627122
	M12		0.00272056	0.00181657	0.00165475	0.00537258	2.78142e-06	0.00462081	0.000495591	0.00095993	0.000430339	0.0167435	0.0207107	0.0191549	0.0428929	0.0486536	0.0474699	0.0627502	0.0663132	0.0606037
	M13		3.57667e-05	0.000320403	0	0.000620803	6.7676e-05	0.000396212	0.0012622	0.000352525	0.000268046	0.0150225	0.0174942	0.0167673	0.037688	0.0399443	0.0397735	0.0582821	0.06198	0.0584363
	M14		0.00043713	7.87257e-05	0	0	0.0101903	0	0	0.000247775	0.00012859	0.0108634	0.0134573	0.011834	0.0324963	0.0349371	0.0340218	0.0511655	0.0621301	0.0589024
	M15		4.40326e-05	0.000566814	0.00160074	0.000117611	0.00154845	4.22207e-05	0.000450223	9.67953e-05	0.000285901	0.00777522	0.00990373	0.00827563	0.0268801	0.028669	0.0272301	0.046863	0.0520446	0.0525117
	M16		0	0	0	2.80407e-05	0	0	0	1.32789e-06	0	0.00444053	0.00655352	0.00700669	0.0216647	0.0234587	0.0237675	0.0379016	0.0457416	0.0441357
	M17		0	0.000323265	0.00057536	0	0	0	0	0	0	0.00444555	0.00488883	0.00507653	0.017563	0.0189305	0.0164537	0.032205	0.0368972	0.038261
	M18		0	4.0299e-05	0.000271406	0	0.00218693	0	0	4.67013e-05	0	0.00282468	0.00314779	0.00262449	0.0117883	0.0130446	0.0116077	0.0233461	0.0294816	0.0334415
	M19		0	0.000508064	0.0111846	0	1.85252e-05	0	0	0	0	0.00187088	0.00217501	0.00258317	0.00862534	0.00997032	0.00890034	0.0197325	0.0233384	0.0240682
	M20		0	0	0.000816584	0	0	0	0	0	0	0.00107168	0.00126635	0.00107502	0.00691518	0.00621743	0.0065527	0.01327	0.0143098	0.0162881
	M21		0	2.38381e-05	0	0	0	0	0	0	0	0.000762364	0.000613568	0.000805742	0.00430057	0.00510079	0.00388761	0.00741209	0.0116351	0.0135383
	M22		0	0	0.000876315	0	0	0	0	0	0	0.000217095	0.000540673	0.000478561	0.00241358	0.00258772	0.00259474	0.00510058	0.00700541	0.00883076
	M23		0	3.74932e-05	0	0	1.99413e-10	0	6.49895e-09	0	0	5.32641e-05	0.000227717	5.26778e-05	0.00174703	0.00155808	0.00167064	0.00362122	0.00395935	0.00557962
	M24		0	0	0	0	6.92637e-05	0	7.12884e-08	0	0	3.66687e-05	0	6.10943e-05	0.00112797	0.00100799	0.000599868	0.00160478	0.00284826	0.00353707
	M25		0	5.18508e-05	0.00164124	0	0	0	2.04706e-05	0	0	3.99328e-05	0	0	0.000443577	0.000555831	0.000474991	0.00062007	0.00171138	0.0022638
	M26		0	3.51441e-05	0.000137814	0	8.57252e-05	0	0	0	0	2.21276e-05	2.07399e-06	3.53245e-05	0.000123388	0.000148917	0.000211632	0.00042844	0.000615645	0.00110904
PC(38:5)	M0		0.952268	0.94933	0.954872	0.910068	0.850939	0.917365	0.814946	0.759914	0.788762	0.445927	0.425767	0.428312	0.252157	0.225456	0.233918	0.121313	0.117845	0.118622
	M1		0	0	0	0	0.00326532	0	0.0199849	0.0380091	0.039479	0.0401489	0.0394037	0.0401634	0.0229069	0.0202244	0.0250166	0.0131959	0.0119734	0.0132221
	M2		0	0	0	0	0	0	0.0605924	0.0707829	0.0612528	0.0944119	0.0906507	0.0876311	0.0560752	0.053818	0.0511377	0.022356	0.0166325	0.0169824
	M3		0	0	0	0	0	0	0.0159726	0.0178633	0.0174623	0.0559976	0.0550949	0.0597126	0.0484788	0.0437749	0.0511407	0.0281735	0.0259109	0.025826
	M4		0	0	0	0	0	0	0.017722	0.0249246	0.0216343	0.0747543	0.0764493	0.0737835	0.06674	0.0664537	0.0611208	0.0398722	0.0308279	0.0336466
	M5		0.000159466	0.000136449	0	3.64313e-05	0.00104722	3.39468e-05	0.00495634	0.00795562	0.00819473	0.0518733	0.0545265	0.056021	0.0628622	0.0610669	0.0589246	0.0495447	0.0424112	0.0381703
	M6		0.00174122	0.00145401	0.00143657	5.56057e-05	0.000374154	0	0.00615376	0.00817492	0.00741055	0.0533596	0.0571407	0.0562055	0.0651772	0.0695885	0.0716536	0.056341	0.0519195	0.0515875
	M7		0	0	0	0	0	0	0.00157057	0.00283083	0.00235827	0.0406078	0.0408888	0.038555	0.0640555	0.0656834	0.065759	0.0571562	0.0579744	0.0509904
	M8		0.00124513	0.000716334	0.00012716	8.35798e-05	1.03265e-05	0.000104907	0.00162951	0.00270196	0.00210109	0.0348626	0.0391147	0.0398616	0.0589268	0.06155	0.0617011	0.0647995	0.0622677	0.0627552
	M9		0	0	4.60324e-05	0	4.35834e-05	0	0.000817273	0.00166052	0.000968369	0.0281612	0.0292175	0.0272188	0.0538906	0.0578615	0.0541355	0.0661763	0.0584715	0.0593022
	M10		0	0	0	4.70434e-05	0.000114509	5.53317e-05	0.00032738	0.000807087	0.000916485	0.0204016	0.0239682	0.0240644	0.0482032	0.0529797	0.0525359	0.0603914	0.0622712	0.0604342
	M11		0	0.000135304	0.000422093	0	1.61249e-05	0	0.000278357	0.000547028	0.000197021	0.0156131	0.0180482	0.017998	0.0409329	0.0445172	0.0411812	0.0636961	0.060273	0.0584805
	M12		0.0311129	0.0328503	0.0215009	0.0610768	0.100677	0.050759	0.0344687	0.0369866	0.0306497	0.0125866	0.0142452	0.0138206	0.0332573	0.0365316	0.0383123	0.0588412	0.0617885	0.0589999
	M13		0.003174	0.00412536	0.00279632	0.00741518	0.0129638	0.00665629	0.00433395	0.00418018	0.00438897	0.00910178	0.0102317	0.0101175	0.0296759	0.0334509	0.0316711	0.0538638	0.0609285	0.053403
	M14		0.000437751	0.000156356	0	0	0.000304774	0.000151547	0	0	0	0.00748975	0.00771924	0.00912374	0.0237754	0.0268837	0.0264343	0.0513022	0.0564731	0.0547633
	M15		0	0	0	0	0	0	0.000133721	0	0.000195027	0.00492016	0.00565214	0.00585365	0.0203238	0.022368	0.0196394	0.0476324	0.0469646	0.0482677
	M16		0	0	0	0	0	0	0	0	0	0.00391124	0.00457361	0.00380133	0.0162252	0.0173757	0.0165042	0.0356711	0.0432419	0.0442725
	M17		0	0	0	0	0	3.78434e-05	6.78703e-05	2.83964e-05	2.43576e-05	0.00226683	0.00275427	0.00321951	0.0111922	0.0134105	0.0131567	0.0324094	0.0354139	0.0362481
	M18		0.00986189	0.0100011	0.00350292	0.0212177	0.0302012	0.024791	0.016045	0.0226134	0.013966	0.00164256	0.00174799	0.00192163	0.00883143	0.00949004	0.00924718	0.0241373	0.0314355	0.0322133
	M19		0	0	0	0	0	0	0	0	0	0.000881264	0.00123389	0.00111586	0.00596904	0.00692408	0.00618795	0.018816	0.021833	0.0240622
	M20		0	0	0.000782557	0	0	0	0	0	0	0.000422203	0.000672541	0.000763458	0.00441636	0.00436808	0.00399809	0.0128134	0.0151356	0.0191243
	M21		0	0.0004947	0.0104216	0	0	0	0	0	0	0.000451289	0.000549042	0.000371649	0.00242741	0.00265741	0.00302579	0.00766477	0.0115676	0.0150039
	M22		0	0.000484999	0.00306541	0	0	0	0	0	0	0.000206574	0.000350545	0.000288394	0.00173532	0.00179991	0.00176199	0.00689806	0.00689902	0.00937436
	M23		0	0	0	0	4.30135e-05	0	0	0	0	9.4599e-07	0	7.63401e-05	0.000956126	0.000798828	0.00100493	0.00306908	0.00441524	0.00642664
	M24		0	7.94102e-05	0.000759737	0	0	4.50837e-05	0	0	0	0	0	0	0.000469344	0.000422862	0.000613463	0.00223632	0.00267218	0.00420354
	M25		0	3.52903e-05	0.0001349	0	0	0	0	1.97103e-05	3.93955e-05	0	0	0	0.000338576	0.000375471	0.000176367	0.000998096	0.00170617	0.0023797
	M26		0	0	0.00013181	0	0	0	0	0	0	0	0	0	0	0.000169014	4.17714e-05	0.000630818	0.000747005	0.00123793
PC(38:6)	M0		0.922564	0.908333	0.940401	0.930489	0.928455	0.926437	0.883159	0.866947	0.858058	0.556051	0.538579	0.559384	0.31191	0.27782	0.296848	0.143716	0.142264	0.143815
	M1		0	0	0	0	0	0	0.00668203	0.00720796	0.0181001	0.041215	0.0473504	0.0283182	0.0335586	0.0294279	0.0365214	0.0200648	0.01247	0.0107666
	M2		0	0	0	0	0	0	0.033334	0.0490956	0.0409365	0.0887436	0.0844328	0.0930462	0.0670266	0.0673064	0.0647443	0.0283205	0.0232831	0.0258186
	M3		0	0	0	0	0	0	0.00446296	0.00632285	0.00566848	0.0487304	0.0504991	0.0473573	0.0570884	0.0517091	0.0570662	0.033755	0.0323669	0.0276795
	M4		0	0	0	0	0	0	0.00647646	0.0122504	0.0114336	0.0556129	0.0580708	0.0601487	0.0706611	0.0696984	0.0712614	0.0367933	0.0365781	0.0348434
	M5		0	0	0	0	0.000213724	0	0.00155913	0.00384607	0.00223318	0.0357433	0.0384032	0.0364698	0.058765	0.0583622	0.0560912	0.0481755	0.0428542	0.0396106
	M6		9.92801e-05	0.00112643	0.000258331	6.4205e-05	0.000279234	0	0.00171343	0.00240138	0.0034146	0.0376515	0.0387707	0.0389078	0.0669335	0.0687772	0.0668797	0.0568355	0.0509986	0.0481889
	M7		0	0	0	0	0.000125861	0.00024607	0.000351855	0.00117304	0	0.0223895	0.0274862	0.0232771	0.0541081	0.0602093	0.0560306	0.0631053	0.0565005	0.0540648
	M8		0.0440581	0.0423553	0.0259288	0.00385391	0.0143401	0.00233784	0.00149283	0.00227618	0.00271684	0.0219145	0.0244726	0.0234494	0.0533135	0.0576544	0.0550864	0.0665223	0.0597526	0.0607961
	M9		0.00120652	0.00131983	0.000565186	0	0	0	1.39262e-05	0	0.000163257	0.0116768	0.0156482	0.0167877	0.0436248	0.0480734	0.0463741	0.0608724	0.0663452	0.0590591
	M10		0	0	0	0	0	0.00011961	0	0.000334239	9.31503e-05	0.0115345	0.0127936	0.0112636	0.0373858	0.0418533	0.0396578	0.0606394	0.057471	0.0560483
	M11		0	0	0	7.40791e-05	0	0	0	0	0	0.00809545	0.00880405	0.00886419	0.0301571	0.036429	0.0329043	0.0538075	0.0561295	0.057314
	M12		0	0.000828233	0	0.000193574	0.00221649	0.000873687	0.000107613	0.000257826	8.26769e-05	0.00487083	0.00669601	0.00658315	0.0258592	0.0300761	0.0270502	0.0498056	0.0547745	0.0542382
	M13		0.000334733	0.00113774	0.000999823	6.45531e-05	0	0	2.38558e-05	0.000426875	0	0.00427544	0.00424396	0.00523591	0.0216865	0.0237396	0.0214733	0.047735	0.0509991	0.0476417
	M14		0.00799509	0.0191988	0.00733742	0.00741522	0.00683432	0.00913714	0.00367728	0.00312382	0.00421994	0.00219133	0.00299268	0.00375729	0.0151275	0.0198818	0.0193788	0.0469008	0.049167	0.0468064
	M15		0.00117601	0.00249153	0.00114558	0.000699282	0	0.000100934	0.000200311	0.000314291	0.000381267	0.00183683	0.00255172	0.00198514	0.0128505	0.0141729	0.0140099	0.0416928	0.0458608	0.0458287
	M16		0	0	0	0	0	0	0	0.000131312	0	0.00133445	0.00157536	0.00171387	0.0104931	0.0133849	0.0112372	0.0352214	0.036663	0.0386544
	M17		0	0	0	0	5.48964e-05	0	0	0	0.000130111	0.000855343	0.0010797	0.000999879	0.00775339	0.00785817	0.00699144	0.0279107	0.0344202	0.0363657
	M18		3.15526e-05	0	0	0.000199953	0.00104771	7.70247e-05	1.62665e-05	3.07973e-05	4.59438e-06	0.00047469	0.000685919	0.000515183	0.0052064	0.00687932	0.00513758	0.0229572	0.0252711	0.0305586
	M19		0	0.000147303	2.42664e-06	3.1686e-05	5.85459e-06	7.43905e-05	7.67233e-05	9.35209e-05	0	0.000312656	0.000422793	0.000857059	0.00379725	0.00374335	0.00496418	0.017542	0.0227535	0.0260834
	M20		0.000509043	0.00113485	0.000638989	0.000100542	0.000461484	0.000168266	8.93138e-05	0.000242838	0.000214988	3.15628e-05	0.000186741	0.000251976	0.00225619	0.00234609	0.00157187	0.0142634	0.0155232	0.0172808
	M21		0	0	0	0	1.5647e-05	0	3.94694e-05	0	0	0.000122651	0.000167634	1.70136e-05	0.00184041	0.00201076	0.00141679	0.0100295	0.0100297	0.0145675
	M22		0.0126177	0.0135126	0.0125136	0.0416773	0.0384624	0.0479289	0.0362992	0.0220753	0.035051	0.0254711	0.0218499	0.0212327	0.000806029	0.000924902	0.00503143	0.00586112	0.00826242	0.00979313
	M23		0.0082903	0.00414431	0.00535008	0.0144102	0.00616773	0.0110166	0.0175231	0.0185473	0.0146603	0.0129053	0.00766058	0.00638609	0.00550531	0.00481631	0	0.00402883	0.00433952	0.00613977
	M24		0.00111744	0.00422822	0.000818144	0.000726347	0.00131003	0.00148238	0.00270139	0.00290168	0.00243709	0.00595939	0.00457612	0.00319067	0.00228627	0.00284552	0.00158117	0.00186351	0.00270893	0.00448501
	M25		0	0	0.00129164	0	0	0	0	0	0	0	0	0	0	0	0	0.000956941	0.0014786	0.0024569
	M26		0	4.15295e-05	0.00274889	0	9.09168e-06	0	0	0	0	0	0	0	0	0	0.000690563	0.000623615	0.000734965	0.00109476
DAG(36:3)	M0		0.926409	0.928627	0.936505	0.973817	0.952909	0.921453	0.74121	0.659999	0.700543	0.568021	0.520493	0.570695	0.487639	0.45625	0.345197	0.329658	0.205011	0.159436
	M1		0	0	0	0	0	0	0.017567	0.0400974	0.022734	0.0344115	0.0477572	0.0203376	0.0280825	0.0112406	0.0197816	0.201354	0.000651166	0.007057
	M2		0	0	0	0.002659	0	0.0238089	0.0902444	0.09918	0.0944994	0.0531579	0.0485859	0.0416863	0.0407624	0.0231008	0.170597	0.0909423	0.216966	0.248295
	M3		0	0.00271287	0	0.000364237	0.00353177	0	0.0366251	0.0273798	0.0357011	0.055792	0.0545112	0.0522211	0.061147	0.0573647	0.161724	0.166332	0.154446	0.165282
	M4		0.000969957	0	0	0	0	0.00231013	0.0424471	0.0662826	0.0478485	0.0495201	0.0577717	0.0637923	0.0217976	0.0420309	0.0535146	0.0495478	0	0.0828052
	M5		0	0	0.0071463	0	0	0.00187042	0.0178783	0.0262947	0.0206614	0.0454597	0.0429929	0.027483	0.0443458	0.0463575	0.136359	0.058222	0.130241	0.157846
	M6		0	0	0.00384462	0	0	0.000290834	0.019507	0.0204557	0.0197873	0.0483201	0.0483292	0.06049	0.0532847	0.068179	0	0.0202079	0	0.035826
	M7		0	0.00163301	0	0	0	0.0205414	0.00739418	0.0147092	0.0142162	0.029549	0.0206855	0.0395979	0.0384579	0.0434862	0.0399797	0.0592799	0.0703411	0.0921192
	M8		0.00616468	0.0056615	0	0	0	0.00281818	0	0.00838513	0.00951499	0.0407098	0.0337273	0.0381918	0.0619586	0.0515986	0.0150963	0	0.0840741	0
	M9		2.54034e-05	0.000897753	0	0.00216396	0	0.0103859	0.000507796	0.017902	0.00653034	0.0238629	0.0297947	0.0251759	0.0284748	0.0483158	0.0162074	0	0.0230017	0.0312592
	M10		0.00786283	0.0128264	0.0136451	0.0209959	0.0421981	0.0124872	0.0233127	0	0.0250587	0.0233197	0.0158563	0.0524762	0.0715037	0.0440248	0.0128315	0.0232269	0.0411366	0.0111541
	M11		0.0585682	0.0476414	0.0388587	0	0.00136147	0.00403435	0.00330661	0.0193146	0.00290505	0.0147653	0.0794949	0.00785238	0.0172511	0.0465928	0.0197128	0.00122835	0.0267421	0.00290185
	M12		0	0	0	0	0	0	0	0	0	0.0131107	0	0	0.045295	0.0614585	0.00899966	0	0.0473896	0.0060185
DAG(36:4)	M0		0.944217	0.973339	0.965216	0.935142	0.946596	0.961409	0.63398	0.538069	0.611639	0.365884	0.333247	0.311022	0.300858	0.266015	0.314348	0.153778	0.127382	0.1375
	M1		0	0	0	0.0336578	0.024835	0	0.0609869	0.0423665	0.0576535	0.040506	0.0445099	0.0407632	0.0250088	0.0267552	0.00790839	0.0152334	0.00524881	0.0122763
	M2		0	0	0	0.00220031	0.00994904	0.0103592	0.127916	0.148202	0.137129	0.0798147	0.0870461	0.0681925	0.0460486	0.0336077	0.0316817	0.0139749	0.0355981	0.0268006
	M3		0	0	0	0.00490297	9.07092e-05	0.000502311	0.0487813	0.0571111	0.0537345	0.0674671	0.0801183	0.0827091	0.0434272	0.0517152	0.0582138	0.138799	0.0292636	0.120586
	M4		0.0182479	0.00536557	0	0	0.00192149	0.0044613	0.046542	0.0786052	0.0477079	0.0817706	0.0840329	0.0791992	0.0554815	0.0517629	0.055402	0.0736278	0.048142	0.0501994
	M5		0.011643	0.00010729	0	0	0.00213913	0	0.0220985	0.0341536	0.0328285	0.0626395	0.0614594	0.0661566	0.0496354	0.0476765	0.0516582	0.0965118	0.0584229	0.0796206
	M6		0.00717106	0	4.93816e-05	0	0	0	0.0193039	0.0378486	0.0171866	0.066854	0.0715239	0.0714164	0.0631166	0.0614756	0.071982	0.0840189	0.0603157	0.02782
	M7		0.00498071	0.000924127	0.0034236	0	0	0	0.00939554	0.0147988	0.0151554	0.0531265	0.0520112	0.0605816	0.0576965	0.0608305	0.0480706	0.0422885	0.0682255	0.0629525
	M8		0.00145339	0	0	0	0	0.000983217	0.00633659	0.0151672	0.00421035	0.0497659	0.0470978	0.0444519	0.0595176	0.064164	0.0608662	0.0836475	0.0714688	0.054888
	M9		0.000676716	0.00362667	0.00222305	0.000710927	0.000247592	0.00748054	0.00134118	0.00538926	0.00164547	0.032665	0.0333023	0.027309	0.0506781	0.0494807	0.0503638	0.0980802	0.0634704	0.0463322
	M10		0	0.0015491	0.0225106	0.0155967	0	0.00115967	0.015099	0.0109021	0.0180782	0.0289504	0.0274539	0.0343259	0.0494914	0.0543389	0.04938	0.0136809	0.0649341	0.0566194
	M11		0	0.0004941	0	0.00352082	0.00173363	0	0.00258789	0.00467819	0	0.0186411	0.0206522	0.0271543	0.037927	0.0483496	0.0417981	0.089359	0.0483242	0.0481994
	M12		0.00476045	0.00606605	0	0	0.00804773	0.000638787	0	0.00203053	0	0.0152966	0.017069	0.0188448	0.0322461	0.0387766	0.030284	0.0331818	0.0507362	0.0503604
	M13		0	0.0065564	0.00457689	0.000881891	0.00144247	0.00779935	0.00166158	0.00472184	0.00292078	0.0126544	0.013272	0.0166997	0.0297021	0.0390073	0.0305382	0.000735965	0.0606095	0.0408769
	M14		0.00152338	0.000570866	0	0	0.000677247	0.00054987	0	0.000568691	0.000110539	0.00741422	0.0103559	0.0134065	0.0317565	0.0299905	0.029	0.0475839	0.0543837	0.0495916
	M15		0	0	0	0	0	0	0.000217315	0.0011461	0	0.00697078	0.00703863	0.00842754	0.0180572	0.0220817	0.0249826	7.48777e-05	0.0463	0.0296821
	M16		0.00327663	0.000911856	0	0	0	0	0	0.000216413	0	0.00528421	0.00400112	0.00553307	0.0189702	0.0206309	0.0209103	0.00246529	0.034014	0.047012
	M17		0	1.71455e-05	0	0	0	0	0	0.000171159	0	0.000336584	0.00389559	0	0.0130105	0.0147099	0.0188758	0	0.0301595	0.0112554
	M18		0	0.000182291	0	0.00197068	0	0	0.00145964	0.0002217	0	0.0030181	0.000619165	0.00136889	0.0108045	0.0111109	0.00160566	0.00759764	0.0320241	0.0274691
	M19		0.00204946	0.000289681	0.00200033	0.00141634	0.00231977	0.0046564	0.0022924	0.00363152	0	0.000940805	0.00129406	0.022438	0.00656576	0.00752098	0.00213029	0.00536115	0.0109773	0.0199585
DAG(36:5)	M0		0.995298	0.987958	0.988163	0.984578	0.988999	0.972263	0.728225	0.657857	0.681905	0.383376	0.364686	0.354539	0.290502	0.255669	0.295849	0.158934	0.133386	0.149686
	M1		0	0	0	0	0	0	0.0529085	0.034729	0.0453929	0.0520934	0.0458081	0.0436372	0.0194321	0.0200485	0.016136	0	0.0144247	0.0202271
	M2		0	0	0	0	0	0.000252595	0.118142	0.146445	0.132514	0.082306	0.0931433	0.0973513	0.0470778	0.0415089	0.0577398	0.0400488	0.0220761	0.0303497
	M3		0	0	0	0	0	0	0.0296198	0.0379618	0.023855	0.0774742	0.065211	0.0696284	0.0552788	0.0499824	0.0497498	0.0398448	0.0301084	0.0323845
	M4		0	0	0	0	0	0	0.0379948	0.0581741	0.0461132	0.0795994	0.08896	0.0880135	0.0674353	0.0680948	0.0675578	0.070804	0.0479146	0.0479225
	M5		0	0	0	0	0	0	0.00704172	0.0214777	0.0165705	0.0625299	0.0570168	0.058672	0.0618457	0.0630014	0.0681779	0.0362538	0.0502793	0.0500439
	M6		0	0	0	0.000223692	0	0.000318794	0.0134232	0.0196742	0.0191421	0.0628644	0.0689244	0.0710654	0.0727672	0.0787257	0.0717933	0.0799494	0.065244	0.0715867
	M7		0	0	0	0.0112914	7.44941e-05	0.0161533	0.00569557	0.00533615	0.0303489	0.0456938	0.0500798	0.0507992	0.0639508	0.0613147	0.0662759	0.0770515	0.0648473	0.0655136
	M8		0	0	0	0	8.30354e-05	0	0.00343167	0.00729631	0	0.0436011	0.0398374	0.0396395	0.0572042	0.0674352	0.0604346	0.0723941	0.0693396	0.065797
	M9		0	0	0	0	0.000109095	0	0	0.00299988	0	0.0298608	0.0320035	0.0290575	0.0494042	0.0557343	0.048351	0.0571408	0.067747	0.0517117
	M10		0	0	0	0	0	0	0.000268812	0.00145431	0	0.0241755	0.0267075	0.0297088	0.0440422	0.0486502	0.0415345	0.0584908	0.0614202	0.0647234
	M11		0.00144105	0	0	0	0.000343225	0.00252906	1.53928e-05	0.000549725	0	0.0144992	0.0182051	0.024218	0.0390131	0.0398913	0.0376998	0.0629633	0.0511364	0.0542318
	M12		0.000150568	0	0	0.000380277	0.00575123	0.00116629	0	0.000351884	1.01756e-05	0.012939	0.0148138	0.0132863	0.03315	0.0345431	0.0234399	0.0542741	0.0552623	0.0523791
	M13		0	0	0	0.000533326	0.00125929	0	0.00121377	0.00221523	0.00136435	0.00692572	0.0127958	0.00959755	0.0247683	0.0290035	0.026158	0.039687	0.056003	0.0487388
	M14		0	2.93563e-05	8.89825e-05	0	0	0	0	0	0	0.00693837	0.00764765	0.00654206	0.019406	0.0227742	0.0180862	0.0364132	0.0497438	0.0400761
	M15		0.00229641	0.0114286	0.0113204	0.00280453	0.00136853	0.00109759	0.00116305	0.00255382	0.00278447	0.00456483	0.00555824	0.007782	0.0174052	0.0203645	0.0164983	0.0330319	0.0430608	0.0333194
	M16		0.000814071	0	0	0	0	0.000273151	0	0.000836793	0	0.00423857	0.00438903	0	0.00991061	0.0113583	0.0124256	0.0279207	0.0360633	0.0291503
	M17		0	0	0.0004273	0.00018841	0	0.000448573	0	0	0	0.00155837	0.00272985	0.0026765	0.00957125	0.0109776	0.00824247	0.0217925	0.0310846	0.038302
	M18		0	0.000584198	0	0	0.000849055	0	0	8.69564e-05	0	0.00142952	0	0	0.00734313	0.00905231	0.00890991	0.012071	0.0154759	0.0216031
	M19		0	0	0	0	0	0	0	0	0	0.000513868	0	0	0.00444109	0.00547494	0.00230243	0.0111269	0.0187313	0.0164249
	M20		0	0	0	0	0.000447314	0	0	0	0	0.000376546	0.000327129	0	0.00366993	0.00392461	0.00217978	0.00527151	0.00987052	0.0097681
	M21		0	0	0	0	0.000716025	0.00549773	0.0008564	0	0	0.00244128	0.00115574	0.00378593	0.00238088	0.00247074	0.000458367	0.00453559	0.00678077	0.00606029
DAG(36:6)	M0		1	0.999407	1	0.976437	0.992587	0.962746	0.841955	0.771614	0.820006	0.559472	0.563415	0.547089	0.408332	0.423386	0.433275	0.202563	0.199588	0.211514
	M1		0	0	0	0	0	0.00705078	0.0196239	0.0155715	0.0225138	0.0500156	0.0425648	0.0590279	0.0282784	0.031572	0.0141383	0.0224031	0.0086662	0.0134998
	M2		0	0	0	0	0	0	0.0516322	0.0640506	0.0626335	0.0856922	0.0909955	0.0911207	0.0590956	0.0464759	0.0522215	0.0235796	0.0257454	0.0234801
	M3		0	0	0	0	0	0	0.0135573	0.0164586	0.0106208	0.0552589	0.0512538	0.0510955	0.0541473	0.0462193	0.0530235	0.0412098	0.0302927	0.0339113
	M4		0	0	0	0	0	0	0.0127626	0.0221	0.0180456	0.0647541	0.0635829	0.0707736	0.0660022	0.0560339	0.0517003	0.044547	0.036372	0.0441109
	M5		0	0	0	0	0	0	0.00215232	0.00400664	0.00367208	0.0369678	0.0389974	0.0313897	0.0536778	0.0532311	0.0607154	0.0472631	0.0469094	0.0397177
	M6		0	0	0	0.000337532	2.17431e-05	0.000423298	0.00479971	0.00572357	0.00550028	0.0410692	0.0467718	0.0428873	0.0589737	0.0571887	0.0554743	0.0693432	0.0593289	0.0605876
	M7		0	0	0	0.0220897	0.00325868	0.0270914	0.046278	0.0782827	0.0474491	0.0273761	0.0245948	0.0269073	0.0523602	0.0520161	0.0501437	0.0587564	0.0575427	0.0641115
	M8		0	0	0	0	0	0	0	0.0010274	0.00160718	0.0242096	0.0220953	0.0239311	0.0417132	0.0443381	0.0607812	0.0638757	0.0704058	0.0593662
	M9		0	0	0	0	0	0	0.00580252	0.0117969	0.00310348	0.015177	0.0148246	0.0133594	0.0356364	0.0402089	0.0298027	0.0672343	0.0568034	0.0686053
	M10		0	0	0	0	0	0	0.0011633	0.00245288	0.00317026	0.0117401	0.012441	0.0147865	0.0344863	0.0345128	0.0315719	0.052948	0.0597392	0.0490558
	M11		0	0	0	0.000313022	0.0017113	0.00153236	0	0.00480091	0.00039293	0.00881213	0.00887635	0.00919418	0.0244776	0.0273555	0.0240212	0.0657466	0.0558405	0.0505844
	M12		0	0	0	0.000275979	4.43573e-05	0	0	0.00133482	0.000682506	0.00789496	0.00775386	0.00734843	0.0205983	0.0212492	0.0183681	0.0487508	0.0507883	0.0409744
	M13		0	0	0	0	0	0.000789023	0	0	0	0.0046624	0.00383952	0.00506308	0.0171965	0.0163579	0.0167846	0.0405691	0.0463946	0.0467377
	M14		0	0	0	0	0	0	5.63344e-07	0	0	0.00247798	0.0036211	0.00275425	0.0118865	0.0143954	0.0177615	0.0386507	0.0395689	0.0383384
	M15		0	0	0	0.000287966	0.00032395	0	0.000272301	0	0	0.00233625	0	0.00301607	0.0131327	0.0107998	0.0086049	0.0284976	0.0386996	0.0381719
	M16		0	0	0	0	0	0	0	3.2282e-06	0	0.000621252	0.00241958	0	0.00647169	0.00938852	0.00872751	0.0319194	0.034818	0.0275051
	M17		0	0	0	0	0.000783492	0	0	0.000776783	2.95836e-06	0.000972267	0	0.000256204	0.00500723	0.00481427	0.00603218	0.019481	0.0215709	0.0272262
	M18		0	3.30117e-08	0	0	3.46678e-05	0	0	0	0.000599119	0.000488403	4.32711e-05	0	0.00377514	0.00463619	0.00225613	0.014091	0.0229368	0.0235468
	M19		0	1.9975e-06	0	0	0	2.84938e-08	0	0	0	2.22556e-06	0.000176459	0	0.00259273	0.00212103	0.00200628	0.00950173	0.0161838	0.0140779
	M20		0	0.000590634	0	6.62609e-07	3.49475e-05	9.52576e-07	0	0	0	0	0	0	0.00142146	0.00303888	0.00157542	0.00602758	0.0103901	0.010672
	M21		0	0	0	0.000258416	0	0.000366452	0	0	0	0	2.76225e-05	0	0.000671521	0.000601597	0.00101411	0.00144048	0.00754544	0.00870005
	M22		0	0	0	0	0.00120025	0	0	0	0	0	0.00170504	0	6.55382e-05	5.88415e-05	0	0.00160056	0.00386987	0.00550474

## Sheet: MIDs (adjusted by pool size)
Table 3: MIDs adjusted by pool size. Data was obtained by multiplying the pool size with MIDs as proportions presented in table 2.
		Time (hours)	0			2			4			8			16			32
ID	Isotopologue	Replicate	1	2	3	1	2	3	1	2	3	1	2	3	1	2	3	1	2	3
PC(34:1)	M0		0.533968	0.537475	0.525447	0.524724	0.426736	0.521774	0.371621	0.336603	0.365787	0.22129	0.222257	0.222634	0.122351	0.12826	0.134029	0.0348811	0.0348486	0.0466215
	M1		0	0	0	0.00212182	0.00861196	0.00205314	0.0240716	0.0212486	0.0292311	0.024433	0.0183416	0.0149852	0.0139883	0.00756864	0.00663235	0.0119119	0.00804512	0.00914274
	M2		0	0	0	0.00812438	0.00706751	0.00911205	0.0646674	0.0676201	0.0549406	0.0397348	0.038447	0.0371549	0.0202051	0.0215567	0.0231932	0.0177687	0.0118099	0.0147898
	M3		0	0	0	0.00111201	0	0.000111034	0.0183112	0.0217909	0.0231532	0.0333613	0.0325703	0.0287359	0.025003	0.0226823	0.0271207	0.028449	0.0218603	0.0183477
	M4		0	0	0	0.000883875	0.000551517	0.000531947	0.0266599	0.0354446	0.0279348	0.041137	0.0408264	0.0442828	0.0370374	0.0357442	0.0354391	0.0327354	0.0262388	0.0236943
	M5		0	0	0.000378058	0	0.0451248	0.000480921	0.0114937	0.0149405	0.0122089	0.0322256	0.0325375	0.0330387	0.0341638	0.032976	0.0370777	0.0419949	0.0381569	0.0389698
	M6		0.00314458	7.43759e-05	0.000125299	3.66589e-05	0.000725881	0	0.00929208	0.0172151	0.011608	0.0343341	0.0346733	0.0347279	0.0429212	0.0452079	0.0444155	0.0452431	0.0414889	0.0381368
	M7		0	6.03944e-05	0.00133138	0	0	0	0.00445793	0.00726743	0.00462096	0.0260192	0.0264885	0.0283822	0.0404694	0.0390635	0.0367106	0.0462774	0.0433062	0.0392674
	M8		0.00288733	0.00202318	0.00785312	0.000551944	0.000544611	5.91683e-05	0.00404943	0.00758248	0.00339784	0.0218378	0.0243043	0.0250109	0.037875	0.0385124	0.0397035	0.0426202	0.0468498	0.0441384
	M9		0	0.000273014	0.00407498	0.00047916	0	4.23812e-05	0.00154655	0.00330417	0.00315296	0.0164739	0.017932	0.0197194	0.0315953	0.0298679	0.0298913	0.0418006	0.0410101	0.0411303
	M10		0	0	0	0.000403866	0.0155626	0.00532213	0.00101011	0.00245898	0.000999645	0.0133164	0.0147285	0.0119099	0.0284872	0.0303132	0.0299407	0.0394226	0.0417045	0.0353702
	M11		0	0	0	0	0.0264631	0.000166096	0.000623291	0.00190976	0.000919734	0.0102044	0.0100848	0.0116767	0.0231332	0.0245811	0.020623	0.0299956	0.0362305	0.0387815
	M12		0	0	0	0	0	0	0.000322795	0.000750926	0.00140556	0.00729218	0.0079217	0.00798487	0.0208837	0.0197154	0.0182679	0.0322089	0.034034	0.0295066
	M13		0	0	0	0	0	0	0.000436454	0.00064198	0.000371375	0.00635404	0.00583668	0.00551004	0.0154668	0.0164541	0.0151787	0.0224939	0.0280697	0.0305706
	M14		0	0	0	0.000616797	0.00474406	0	0.000241995	0.000848197	3.10382e-05	0.0039137	0.00416034	0.00423609	0.0127486	0.013805	0.010899	0.0218342	0.022239	0.023991
	M15		0	0	0	0	0.000558465	0	7.41006e-05	0	0	0.00291224	0.00308008	0.00332976	0.0108229	0.010319	0.00973466	0.0164915	0.0196098	0.0194022
	M16		0	0	0	2.7716e-05	0	0	4.23703e-05	0.000137961	0	0.00179084	0.00255376	0.00331462	0.00718625	0.00774793	0.00762252	0.0118111	0.0153576	0.0139871
	M17		0	7.4305e-09	1.26942e-07	0	8.02263e-05	2.33662e-06	0	0	0	0.00135044	0.00147996	0.00189572	0.00574105	0.00577777	0.00453486	0.0100854	0.0122177	0.0119446
	M18		0	7.91598e-05	0.000333039	0.000918121	0.000359646	0.000344572	0.00084233	8.19124e-05	0.000196809	0.00102702	0.00108373	0.000227068	0.00432709	0.00401952	0.00356666	0.00640961	0.00770329	0.00770541
	M19		0	1.49641e-05	0.000456872	0	0.00279378	0	0.000204236	6.74976e-05	4.08566e-05	0.000492747	0.000586026	0.00082548	0.00260703	0.00279092	0.00264672	0.00439188	0.00423853	0.00669446
	M20		0	0	0	0	0	0	0	8.09659e-06	0	0.000301176	0	0	0.00164981	0.00138357	0.00155659	0.00012205	0.00309924	0.00348016
	M21		0	0	0	0	2.2854e-05	0	3.12014e-05	0	0	0.000163282	0.00010627	0.000417857	0.00104739	0.000974624	0.000553595	0.00105087	0.00128067	0.00308302
	M22		0	0	0	0	5.30946e-05	0	0	7.76744e-05	0	3.50125e-05	0	0	0.000289818	0.000678399	0.000661919	0	0.000600834	0.00124451
PC(34:2)	M0		3.69503	3.70511	3.72829	3.55762	3.20852	3.54617	2.83021	2.59354	2.89099	1.78093	1.72899	1.58628	1.21492	1.06906	1.11149	0.502098	0.476837	0.583101
	M1		0	0	0	0	0.00457263	0	0.121181	0.133776	0.0929074	0.158796	0.146073	0.162958	0.10886	0.0998087	0.111919	0.101004	0.0816019	0.086422
	M2		0	0	0	0.00903725	0.00901303	0.0146935	0.320704	0.400654	0.337937	0.305771	0.320072	0.322505	0.214674	0.23008	0.215638	0.13235	0.117878	0.123904
	M3		0	0	0	0	0	0	0.0759339	0.104097	0.0724638	0.204826	0.23298	0.246431	0.20639	0.20595	0.215666	0.187767	0.165617	0.164048
	M4		0	0	0	0	0	0	0.112931	0.153726	0.113513	0.257843	0.273849	0.283213	0.262023	0.26531	0.268795	0.222578	0.193095	0.18789
	M5		0	0	0	0.000571586	0	0.00022346	0.0296041	0.0540773	0.0389256	0.190389	0.221902	0.225903	0.23189	0.24827	0.254564	0.278593	0.245355	0.21573
	M6		0	2.75209e-05	0	0.000209213	0.000850895	0.000309208	0.0367272	0.0602732	0.0408352	0.198704	0.220231	0.224454	0.270524	0.280953	0.296996	0.3085	0.269069	0.266015
	M7		0	0	0.00119867	0	6.30942e-05	0.00015321	0.0135356	0.022764	0.0126254	0.130263	0.155478	0.175217	0.233055	0.248387	0.220767	0.307231	0.300468	0.268248
	M8		0.000135472	0	0	0.000129315	0.00527793	0.00094454	0.0100432	0.0220179	0.0115878	0.123551	0.144148	0.143625	0.2237	0.22967	0.247179	0.306737	0.285147	0.271759
	M9		0.000202826	0.000535589	0.000497489	0.00263783	0.00138174	0	0.0054894	0.00875429	0.00657882	0.085181	0.102033	0.0977141	0.180436	0.194845	0.188002	0.252197	0.273136	0.250209
	M10		0.0340562	0.0351194	0.00130896	0	0.372094	0.00276661	0.00222197	0.00721605	0.00345452	0.0656236	0.0765887	0.0849362	0.16146	0.174185	0.161722	0.228117	0.258167	0.23923
	M11		0.00254186	0	0.00174634	0.000586096	0.0472705	0.000859725	0.00178756	0.00361467	0.00179769	0.0458602	0.0564628	0.0573239	0.118852	0.133651	0.128519	0.209788	0.224847	0.227008
	M12		0.0140721	0.0185863	0.0181495	0.059975	0.0234314	0.0341533	0.0388804	0.00311379	0.000934927	0.0364795	0.0422524	0.0453142	0.101809	0.115149	0.108941	0.1669	0.19634	0.186467
	M13		0.00123633	0.000497872	0.00332878	0.00639515	0.00284951	0.0046516	0.00661472	0.000760973	0.0147735	0.026516	0.0308008	0.0313594	0.0751718	0.0850955	0.081696	0.166388	0.176989	0.169712
	M14		0.00229023	0.00189017	0	8.50313e-05	0.0226177	0	0.000895535	0.00440989	0	0.0207793	0.0217446	0.0230344	0.0669112	0.0700311	0.0615829	0.118044	0.154751	0.138892
	M15		0.00209965	3.26237e-05	0	0.000126516	0.00287335	0	0.000416265	0.000144789	0	0.0131028	0.0164005	0.0146207	0.0490179	0.0565073	0.0476219	0.114357	0.117125	0.125697
	M16		0	0	0	0.000905715	0.00516018	0.000699149	0.00109546	0.00311497	0.000651619	0.0085091	0.0106026	0.011466	0.035026	0.0377202	0.0356394	0.0767781	0.0966164	0.0934406
	M17		0.00275029	0.00104581	0	0.0179973	0.0774708	0.0252043	0.0122453	0.0353743	0.0136111	0.00598852	0.00645398	0.00634457	0.0277683	0.0281683	0.0247351	0.0483753	0.0703655	0.0760639
	M18		0	0	2.01484e-07	0.00179569	0.00951016	0.00483724	0.00197072	0.00574068	0.00318919	0.00389458	0.00431923	0.00448858	0.017533	0.0193895	0.0172848	0.0452539	0.0519634	0.0551207
	M19		0	0.00013196	0.000177794	0	0	0.000217185	0	0	0	0.00194944	0.00235289	0.00249097	0.0127863	0.0127694	0.012043	0.0231878	0.03114	0.0379571
	M20		0	0	0	0	0	0	8.87225e-05	0	0	0.00157835	0.000789829	0.000897778	0.00714004	0.00794461	0.00691051	0.0137312	0.0188306	0.0252424
	M21		0	0	0.000573081	7.45309e-05	0.000860748	8.41725e-05	0.000407582	0	0	0.000565544	0.001135	0.00150435	0.0050571	0.0043342	0.00418166	0.0100492	0.0122563	0.0183056
	M22		0.061878	0.0419267	0.0439713	0.116617	0.0245778	0.161023	0.142173	0.164726	0.131218	0.103952	0.0101555	0.048995	0.00338627	0.00290399	0.00167871	0.00398171	0.00658394	0.00884747
	M23		0.00209604	0.00956857	0.00973651	0.040653	0.00161018	0.024049	0.0400342	0.025802	0.0254254	0.0395603	0	0.0136102	0.000851025	0.00157422	0.00629249	0.0016704	0.004151	0.0063469
	M24		0.0116074	0.0155272	0.0210202	0.0145861	0.00999696	0.00895826	0.0248078	0.0223004	0.0165858	0.0193913	0.00418906	0.0153134	0.000385072	0.00824426	0	0.00432338	0.00154606	0.00344043
	M25		0	0	0	0	0	0	0	0	0	0	0	0	0.000372457	0	0.000139005	0	0.000122721	0.000904522
PC(34:3)	M0		2.81195	2.79947	2.78693	2.79886	2.77998	2.78871	2.55427	2.44187	2.4782	1.69276	1.64611	1.64683	1.07977	0.996777	1.02947	0.463169	0.431929	0.460086
	M1		0	0	0.0177078	0	0	0.00555168	0.0439078	0.0578433	0.0776837	0.12812	0.11896	0.129728	0.125312	0.119761	0.11642	0.0978075	0.0843159	0.0856329
	M2		0	0	0	0	0	0	0.126614	0.171942	0.137375	0.247061	0.253877	0.247339	0.202976	0.196154	0.198232	0.122961	0.10856	0.106816
	M3		0	0	0	0	0	0	0.0353406	0.0505606	0.0468816	0.156943	0.161555	0.16379	0.193444	0.193075	0.198469	0.153729	0.143019	0.142606
	M4		0	0	0	0	0	0	0.0311692	0.0509989	0.0429374	0.160193	0.173114	0.162432	0.195735	0.191399	0.196497	0.153573	0.139652	0.133639
	M5		0	0	0	0.00978972	0.0164569	0.00890079	0.0116441	0.0166098	0.0131396	0.109743	0.106072	0.108711	0.171345	0.172757	0.174094	0.186489	0.178578	0.162646
	M6		6.80442e-05	7.32249e-06	0.000244317	0	0	0	0.00850635	0.0156901	0.0143864	0.0994595	0.115366	0.115523	0.170692	0.190261	0.181511	0.209667	0.19955	0.188293
	M7		0	0	0	0	0.000153909	0	0.00264291	0.00646645	0.003265	0.0649653	0.0692363	0.0657031	0.146883	0.159285	0.151584	0.214025	0.217646	0.202831
	M8		0	0.000328155	0	0	0	0	0.00247793	0.00456915	0.00378883	0.0559053	0.0598294	0.0646029	0.133418	0.138643	0.138474	0.20376	0.204851	0.200931
	M9		0	0	0	0	0	0	0.00136555	0.00233131	0.00169171	0.0358931	0.0399812	0.0369113	0.0988278	0.110012	0.107255	0.188086	0.1857	0.188807
	M10		0	2.54636e-06	0	0	0	6.8312e-05	0	0.00160113	0.000770406	0.0275161	0.0297257	0.0301258	0.0822656	0.0942197	0.0840336	0.157831	0.1719	0.167835
	M11		3.7168e-05	0.000101309	0.000331503	0	0.00150789	0.000186786	0.0001248	0.000235695	0	0.0174313	0.020002	0.0199558	0.0615684	0.0705789	0.0692296	0.142375	0.150858	0.150104
	M12		0.00381587	0.00718337	0.0044053	0.00618221	0.0114566	0.00710751	0.00442568	0.00326456	0.00253072	0.0115944	0.0143084	0.0134491	0.0439068	0.051845	0.0498855	0.114378	0.124301	0.119626
	M13		0	0.00112502	0	0.00114859	0.00223481	0.000137459	0	0.00029388	0.000469345	0.0104502	0.0102597	0.00884341	0.0376821	0.0431982	0.0415247	0.100629	0.111585	0.114067
	M14		0.0011423	0.00021421	0.000114528	0.000272962	0.00865079	0.00264551	0.0016851	0.00112555	0.00182808	0.00549947	0.00663664	0.00729453	0.0254278	0.0322494	0.0288175	0.0840854	0.095751	0.0940576
	M15		0.000368047	1.01874e-05	0.000383665	0.000145873	0.000611211	0	0	0	0.00030524	0.0038027	0.00424256	0.00447262	0.0216365	0.0232487	0.0225615	0.0729212	0.0808744	0.0817397
	M16		0	0	0	0	0	0	2.10675e-05	0	0.000222713	0.00236733	0.00302601	0.00349561	0.0139218	0.0173431	0.0148066	0.0544397	0.0649431	0.0652516
	M17		0	0	0	3.81495e-05	0	0	0	2.77208e-05	0	0.00201514	0.0019472	0.00221209	0.0102639	0.013515	0.0105917	0.0393953	0.0446376	0.0545023
	M18		6.22802e-05	0	0	0.00011903	0	0	5.88805e-05	2.91054e-05	6.88381e-06	0.00114765	0.00111611	0.000977726	0.00811416	0.0084028	0.00778204	0.0299173	0.0367799	0.0405107
	M19		0	0	6.231e-05	2.48499e-05	0	9.53155e-05	1.26254e-05	4.27884e-05	0	0.000439095	0.00083581	0.000602506	0.00353002	0.00537303	0.00521637	0.0192076	0.0264007	0.0288382
	M20		2.10448e-05	0	0	0.00164659	0.00678434	0.00251235	0.00103676	0.00242508	0.000827676	0.00167616	0.000542278	0.000190422	0.00328317	0.00277103	0.00335539	0.0133769	0.0148348	0.0204786
	M21		0	0	6.55152e-05	0.000189123	0.000318622	0.000456343	9.34929e-05	0.000119895	0	0.000194986	4.38786e-05	5.09333e-05	0.00181665	0.00176924	0.00200161	0.00923956	0.0108648	0.0137027
	M22		0	0	0	0	0	2.16488e-05	0	0	0	2.84884e-05	0	6.43146e-05	0.000684832	0.000931765	0.000961228	0.00438504	0.00605998	0.00819779
	M23		0	0.000255097	0.000223471	0	0.000763751	0.000226597	0	0	0	5.10896e-05	6.98111e-05	0	0.000620662	0.000293295	0.000673705	0.00201548	0.00352962	0.00513206
	M24		0.0200193	0.026421	0.0237845	0.0194401	0.00912639	0.0186622	0.0120418	0.00971992	0.012041	0.00385992	0.00228593	0.00520109	0.00530722	0.00447406	0.00510839	0.00177091	0.00204913	0.00251825
	M25		0.00251543	0.00488616	0.005743	0.00213955	0.00195672	0.00471282	0.00256647	0.00223096	0.00164841	0.000877462	0.000854911	0.00149652	0.00156453	0.00166289	0.00144455	0.000765202	0.00083041	0.00115017
PC(34:4)	M0		0.0275131	0.0267822	0.0268063	0.0257769	0.0115024	0.0230789	0.0247479	0.0204386	0.0222747	0.0146583	0.0134239	0.0120274	0.00887472	0.0087016	0.0085982	0.00439399	0.00337748	0.00361664
	M1		0	0	0	0	0.000957331	0	0	0	0.0010806	0.000323042	9.49064e-05	0.00127476	0.000789089	4.247e-05	0.00152678	0.000302031	0.000668472	0.00122011
	M2		0	0	0	0	0.000440625	0	0.00186573	0.00295726	0.00239286	0.00341946	0.00332434	0.00337286	0.00231684	0.00214814	0.00169383	0.00116769	0.000907565	0.000735953
	M3		0	0	0	0	0	0	0.00059673	0.000929829	0.000251869	0.00182553	0.00207899	0.00205668	0.00155352	0.00188545	0.00201911	0.00174565	0.00129032	0.00144633
	M4		0.000647433	0.000932243	0.000434756	0.000277727	0.00114868	0.000323042	0.000512344	0.000813929	0.000927375	0.00228403	0.00223039	0.00294658	0.00221975	0.00260612	0.00242798	0.00160778	0.00173742	0.00171711
	M5		0.000318957	0.000324866	0.000747013	0.00263023	0.00316994	0.00500325	0.000227769	0.000481571	0.000255341	0.00155112	0.0018379	0.00154677	0.00212021	0.00231721	0.0022048	0.00215127	0.00200235	0.00188752
	M6		0.000219683	0.000391213	0.000668029	0	0.00263369	0.000113224	0.000798685	0.000366523	0.000222018	0.00151208	0.00167004	0.00206578	0.00235985	0.00232259	0.0026435	0.00250956	0.00228487	0.00232771
	M7		0	0	0.000101484	0	0	0	0	1.67791e-05	0.000209385	0.000866205	0.00118504	0.00127479	0.00230271	0.00188164	0.00179666	0.00213228	0.00210352	0.00182767
	M8		1.42135e-06	0	0	0	0	0	0	6.21942e-05	0	0.000933519	0.000930226	0.000856563	0.00141624	0.00202247	0.00182565	0.00198534	0.00234082	0.00244691
	M9		0	8.07781e-06	0	0	0	0	4.62569e-06	6.57685e-05	1.16988e-05	0.00057463	0.000738048	0.00101674	0.00151296	0.00142664	0.00120137	0.00230893	0.00192515	0.00191033
	M10		0	0	0	0	3.75601e-05	0	0	0	0	0.000483819	0.000549608	0.000213109	0.000940555	0.00115435	0.0012031	0.00191366	0.00202359	0.00194122
	M11		0	7.47417e-05	0	0	0	7.43434e-08	0	0	0	0.000215983	0.000361571	0.000504025	0.00107368	0.000951063	0.000514544	0.00195761	0.00186802	0.001662
	M12		0.000317344	0.000308802	0.000106934	6.40558e-05	0.00561759	0.000118654	6.268e-05	0.00122823	0.000553158	0.000235745	0.000206601	0.000153215	0.000566826	0.000836144	0.000561902	0.00124868	0.00177886	0.00151624
	M13		0.000745395	0.000445683	7.49462e-05	0.000273436	0.000286656	0	0.000141067	0.00163055	8.56947e-05	0.000182912	0.000409581	0.000348834	0.00067043	0.000368671	0.000704508	0.00143454	0.00150789	0.0013057
	M14		0.000173997	0.000705943	0.000509351	0.000977604	0.00415038	0.001294	0.000956271	0.000972552	0.00155816	0.000576976	0.000407609	0.000270538	0.000265705	0.000428576	0.000353921	0.00112077	0.00122838	0.001116
	M15		0	0	0.000358723	0	0	5.10208e-05	0	0	0.000128513	0.000117176	0.000260103	1.88688e-06	0.000426556	0.000390812	0.000342428	0.000733947	0.00114908	0.00119248
	M16		0	0	0	0	0	0	6.19659e-05	1.62889e-05	3.80107e-05	7.94257e-05	3.73072e-05	5.79811e-05	0.000254842	0.000224212	0.000130027	0.000796282	0.000754471	0.000880611
	M17		6.26601e-05	2.6226e-05	0.000192481	0	0	7.31451e-06	0	0	8.2192e-07	0.000121039	0.000103113	1.14877e-05	0.000146014	0.000220614	0.000134307	0.000195357	0.000669651	0.00072315
	M18		0	0	0	0	5.51734e-05	1.05318e-05	2.4232e-05	1.98693e-05	9.8271e-06	3.89589e-05	0.000150773	0	0.000189502	7.12261e-05	0.000117391	0.000294625	0.00038208	0.000526317
PC(36:1)	M0		0.923209	0.963183	0.967218	0.996246	0.831436	0.983193	0.803921	0.782232	0.815144	0.621734	0.673779	0.67701	0.449395	0.515217	0.531515	0.380317	0.214564	0.272614
	M1		0	0	0	0	0	0	0.020405	0.0164576	0.00703375	0.0326277	0.030434	0.00989873	0.0096265	0	0.00447	0	0.017516	0
	M2		0	0	0	0	0	0.0102041	0.0772713	0.0805436	0.0740112	0.0405358	0.0263056	0.0330449	0.0244469	0.0219303	0.0185428	0	0.0137675	0.0258387
	M3		0	0	0	0.00110568	0.00069608	0	0.0221603	0.02306	0.0232807	0.0410576	0.0383813	0.0286739	0.0295913	0.031401	0.0337638	0.0161547	0.0424067	0.0195237
	M4		0	0	0	0.000971943	0.000368284	0.00094135	0.0367287	0.0420085	0.034812	0.0475285	0.0428243	0.0441385	0.0406466	0.039821	0.0434107	0.0856077	0.0450547	0.0533127
	M5		0.000468841	0.00116277	0	0	0.0843959	0	0.0113097	0.0167028	0.0142358	0.039569	0.0362916	0.042385	0.0402137	0.0499226	0.0475102	0.0852213	0.0615286	0.0805065
	M6		0.00188683	0.000822635	0.00185988	0	0.00212379	0	0.0147227	0.0150825	0.010315	0.0404859	0.034492	0.0383815	0.0593597	0.0518806	0.048079	0.0352502	0.0770974	0.101687
	M7		0	0.000943322	0.00386616	0	0.000826593	0.000987792	0.00364022	0.00967252	0.00735605	0.032755	0.0276143	0.032958	0.0498969	0.0388148	0.0464271	0.126886	0.0739893	0.0403244
	M8		0.000129364	0	6.27359e-05	0.00089533	0	0	0.00465984	0.00563223	0.00670537	0.030196	0.0290912	0.0271593	0.053247	0.0491962	0.0496387	0.0548715	0.0612487	0.0743866
	M9		0.00169224	0.00075136	0.000224962	0	0.00246015	0	0.00216846	0.00194076	0.00205772	0.0159089	0.0163627	0.0157945	0.0486668	0.039111	0.0421191	0.0800547	0.0883529	0.0847805
	M10		0.072533	0.0325028	0.0267678	0	0.0758708	0.00467367	0.00207591	0.00410633	0.00371774	0.0152605	0.0150639	0.0148301	0.0386242	0.0316638	0.0321275	0.0273755	0.0644828	0.025529
	M11		0	0	0	0	0	0	0.000540625	0.00165706	0.000504965	0.0130243	0.00852505	0.0117834	0.0325421	0.0299537	0.0193791	0.0526045	0.0560469	0.0635129
	M12		0	0	0	0.000590664	0	0	4.67853e-05	0.000364684	0.000413007	0.00990467	0.00601657	0.0124743	0.0314379	0.0314502	0.0220251	0	0.0384895	0.0348434
	M13		0	0	0	0.000190192	0	0	0.000349191	0.000371954	0	0.00591248	0.0064018	0.00411259	0.0268223	0.0180977	0.0243075	0.0240925	0.04258	0.0414236
	M14		8.04579e-05	0.000497696	0	0	0	0	0	0	0	0.00584196	0.00431462	0.00215108	0.0174367	0.0142608	0.00861075	0.0174732	0.0391769	0.0340706
	M15		0	0	0	0	0	0	0	0	0	0.00228786	0.00263583	0.00245529	0.0159069	0.0144635	0.00948759	0.0111374	0.028023	0.0213138
	M16		0	0	0	0	0.000858739	0	0	0	0.000197584	0.00348753	0.00146581	0.00261244	0.0145502	0.00954624	0.00957451	0.00295397	0.0224446	0.00289686
	M17		0	0.000136443	0	0	0	0	0	0	0	0.00112056	0	0.000136026	0.0116543	0.00725006	0.00901119	0	0.0132303	0.0211277
	M18		0	0	0	0	0.000963706	0	0	0.000167313	0.00021545	0.000761777	0	0	0.00593461	0.00601941	0	0	0	0.00230726
PC(36:2)	M0		1.38611	1.40463	1.41151	1.35763	1.32101	1.36648	0.984078	0.958023	1.01165	0.717108	0.75576	0.75062	0.536613	0.56038	0.532338	0.327819	0.25782	0.325762
	M1		0	0	0	0.00751512	0.0088045	0	0.0568356	0.0480825	0.0435226	0.0337052	0.0318817	0.02849	0.027867	0.0252927	0.0211281	0.00563567	0.00918221	0.0286822
	M2		0	0	0	0.0357399	0.0244823	0.039519	0.136357	0.124616	0.129681	0.0830582	0.0740534	0.0714669	0.0515645	0.0518205	0.054321	0.0374621	0.0285324	0.0273745
	M3		0	0	0	0	0.000774957	0	0.0478795	0.047969	0.0413597	0.0569152	0.0589793	0.0560053	0.0502819	0.0516817	0.0572863	0.051699	0.0381364	0.0374851
	M4		0	0	0	0.00528711	0.00199828	0.00505498	0.0691267	0.0714842	0.0696828	0.0718217	0.0745826	0.0725592	0.0649269	0.0701209	0.0727536	0.069793	0.0513262	0.0501524
	M5		0	0	0.000642422	2.30041e-05	0.000815981	1.38656e-05	0.0318769	0.0340057	0.0283303	0.0557612	0.05849	0.0554675	0.0633952	0.0631297	0.063325	0.0669969	0.0622828	0.0740538
	M6		0.00417389	0.000565047	0.00125319	0.000194209	0.00723112	0.00057565	0.0320119	0.0399245	0.0339342	0.0653177	0.0630289	0.0639198	0.0731377	0.0765993	0.078452	0.0843195	0.0743149	0.0778619
	M7		0	0.000524846	0	5.64909e-05	0	0.000251987	0.0188305	0.0243574	0.0191419	0.0491121	0.0490065	0.0538338	0.0631707	0.0640758	0.0729768	0.0937338	0.0800595	0.074184
	M8		0	0	0.000397085	0	0	3.87801e-05	0.0144798	0.0228726	0.0129692	0.0531589	0.0511341	0.0485317	0.0712511	0.0708258	0.0666728	0.104676	0.090225	0.0856311
	M9		0	0.000157096	0.000504307	0.00030987	0.000154915	0.000349014	0.00970372	0.0141814	0.00934483	0.0443805	0.0379766	0.0424773	0.0591089	0.0582636	0.0618004	0.0845926	0.0941804	0.0841674
	M10		0.0245768	0.00859589	0.00118513	0	0.0436206	0.00147613	0.0072567	0.0113377	0.00804719	0.0390686	0.0334958	0.0361795	0.0554427	0.057535	0.0651111	0.0731284	0.0852745	0.0835031
	M11		0.00236595	0.000737689	9.16364e-05	5.68196e-05	0.00428427	0.000428702	0.00441254	0.00745146	0.00405006	0.0328695	0.0286582	0.0308714	0.0539153	0.0456953	0.0453317	0.0781387	0.0846317	0.0734624
	M12		0.00117542	0.00173829	0.00325714	0.0119978	0	0.00454199	0.00316536	0.00557223	0.00420412	0.0275386	0.0245564	0.0250819	0.0446885	0.0447648	0.0489081	0.076779	0.0861134	0.0702324
	M13		0	0.000380226	0	0.000966446	1.41895e-05	0.000720428	0.00179562	0.00443158	0.00134425	0.0218718	0.0216878	0.022185	0.0419286	0.0389627	0.0402707	0.0612282	0.0703085	0.0681189
	M14		0.00159493	0.000866875	0	0.000171265	0.0046927	0.000264185	0.00150045	0.00235862	0.00103095	0.0204064	0.0151104	0.0170155	0.0383597	0.0341778	0.0311208	0.0591665	0.0787597	0.0607981
	M15		0	0	0	0	0.000626675	0	0.000337179	0.00138546	0.000954832	0.014303	0.0136222	0.0132966	0.028641	0.0264133	0.0318947	0.0483886	0.0573642	0.0505382
	M16		0	0	0	5.49666e-05	0	0	0.000223972	0.000803026	0.000166933	0.011145	0.00818538	0.0106492	0.0269941	0.0215412	0.0192091	0.0305307	0.0500862	0.0458636
	M17		0	0	0	0	4.76674e-07	6.80188e-05	4.30783e-05	0.000390233	0.00047695	0.00753207	0.00724805	0.00840287	0.0215363	0.0173545	0.0199619	0.030698	0.0433096	0.0319973
	M18		0	0	0	0	7.70663e-05	0	6.54117e-05	0.000165742	0	0.00630291	0.00530537	0.00514842	0.0158295	0.0132386	0.0123793	0.015129	0.0286576	0.022698
	M19		0	5.07413e-07	0	0	0	0	0	3.09508e-05	0	0.00372471	0.00303034	0.00393599	0.0118602	0.0107993	0.00889692	0.00969055	0.0169244	0.019469
	M20		0	0.000101331	0	0	6.26808e-05	0	0	0	0	0.00247206	0.00201903	0.00243603	0.00725805	0.00665969	0.00634484	0.00815268	0.0147511	0.0107447
	M21		0	0	2.79846e-07	0	0	0	0	0	0	0.00107571	0.00100212	0.000373853	0.00550364	0.00454226	0.00398359	0	0.00766819	0.0098529
	M22		0	0.00010139	3.03123e-06	0	0	8.11086e-07	0	3.35735e-05	0	0.00103626	0.00100895	0.000181736	0.00340303	0.00288974	0.00347619	0	0.00519697	0.0041364
	M23		0	0.00130283	0.000870108	0	0.00102707	0.000216301	0	0.00048517	0	0.000237371	7.48198e-05	0.000792415	0.00206873	0.00146821	0.00119111	0.00172946	0.00212588	0.00258363
	M24		0	0.00020784	0	0	0.000321504	0	0	0	0	0	0.000101756	0	0.000991967	0.000796121	0.000493152	0.000513317	0.00186919	0
	M25		0	9.02988e-05	0.000282236	0	6.63483e-07	0	2.0018e-05	3.79506e-05	0.000107002	7.69568e-05	0	7.84276e-05	0.000261708	0.000971164	0.000373275	0	0.00089878	0.000647077
PC(36:3)	M0		4.24488	4.25848	4.25551	4.10793	4.16436	4.13004	3.24449	2.99943	3.21468	2.4178	2.45274	2.40033	1.4667	1.39683	1.39505	0.973733	0.889976	0.994634
	M1		0	0	0	0.0563661	0	0.0445116	0.137273	0.171735	0.121666	0.130384	0.159085	0.129029	0.113888	0.103193	0.0957812	0.0880003	0.07808	0.0837053
	M2		0	0	0	0.0424101	0.0471568	0.0429906	0.340551	0.341966	0.358468	0.246876	0.229291	0.225998	0.169347	0.155428	0.177994	0.13678	0.0925028	0.122385
	M3		0	0	0	0	0.00198943	0	0.124587	0.146246	0.128372	0.18232	0.185215	0.201845	0.167284	0.170902	0.167424	0.156212	0.134535	0.139891
	M4		0	0	0	0.00558742	0.00105743	0.00729027	0.166023	0.201341	0.177879	0.212902	0.196775	0.201874	0.187632	0.199483	0.21939	0.181551	0.145631	0.150425
	M5		0	0	0	0	0.000756359	0.000543862	0.0685771	0.097048	0.0650355	0.148333	0.150934	0.155191	0.187084	0.179224	0.186921	0.20655	0.195848	0.182202
	M6		0.00213157	0.000911015	0.000343011	0.00109642	0.0149968	0.0010145	0.0735206	0.110672	0.0815781	0.161289	0.164164	0.170767	0.214903	0.232172	0.244366	0.263684	0.22295	0.207898
	M7		0.00198123	0.0013222	0.001431	0.00719855	0.00281563	0.00752494	0.0379724	0.0561308	0.0374558	0.129804	0.128942	0.142178	0.200834	0.210521	0.209754	0.263985	0.242843	0.239081
	M8		0	3.48849e-05	0.00029627	0.000483059	0.00432195	0	0.0304282	0.0507963	0.0346061	0.130352	0.126133	0.133214	0.212261	0.225264	0.226891	0.268451	0.250913	0.230763
	M9		0	0.000225048	0.00203763	0	0	0	0.0164603	0.0300503	0.017888	0.103275	0.0909597	0.100574	0.179509	0.188811	0.195519	0.266657	0.267888	0.249648
	M10		0.0035942	0.00157972	0	0.000241361	0.00287604	0.00071626	0.0129872	0.0257759	0.0156462	0.0961145	0.090701	0.0928157	0.188066	0.19617	0.194597	0.24059	0.244686	0.244734
	M11		0.000976908	0.000938572	0.00202897	6.88806e-05	0.0023306	0.000827139	0.0068358	0.0140018	0.00716472	0.0730774	0.0696415	0.0758544	0.166814	0.176831	0.169305	0.23398	0.252934	0.230147
	M12		0.0176557	0.0124521	0.0117588	0.038217	0.00198494	0.027748	0.00458776	0.00994793	0.00546591	0.0613236	0.0543977	0.0626693	0.154107	0.156419	0.155042	0.182489	0.230172	0.215767
	M13		0.00175255	0.00238461	0.00283205	0.00511587	0	0.00368651	0.00275498	0.00563598	0.00347257	0.0504629	0.0501061	0.0530496	0.137772	0.15306	0.146744	0.201971	0.213417	0.187828
	M14		0.00427306	0.000100739	0	0.000364619	0.0209147	0	0.00134645	0.00397904	0.0023627	0.0411809	0.0386087	0.03789	0.126819	0.125457	0.116567	0.155099	0.192938	0.166475
	M15		0	4.14708e-05	0.000508779	0	0	0	0.00130254	0.00227211	0.000499892	0.0294638	0.029868	0.0297163	0.102541	0.104486	0.100799	0.11501	0.165774	0.150292
	M16		0	0	0	0	0	0	0.000120133	0.00140696	0.000915354	0.0229252	0.0214934	0.0213824	0.0857955	0.090978	0.0812368	0.10984	0.125885	0.133961
	M17		0	0	0	2.62262e-05	0.00035927	0	2.42971e-05	0.000802085	0	0.0145299	0.0137997	0.0165721	0.0675417	0.0663135	0.0607811	0.0797231	0.114898	0.10395
	M18		0.00275933	0.000664552	0.000626979	0.0147398	0.00182848	0.0131036	0.00978547	0.00994095	0.00635721	0.0120449	0.0118013	0.0123509	0.0527723	0.0518441	0.0485246	0.0589263	0.0742098	0.0789254
	M19		0	0	5.62146e-05	0	0.0101257	0	0.000371021	0.000605129	0.00048848	0.00578558	0.00688069	0.00779246	0.0361859	0.0339541	0.0327608	0.0370869	0.0556893	0.0586548
	M20		0	2.09681e-05	0	0	0	0	0	0	0	0.00552228	0.00431886	0.00484217	0.0257921	0.0247632	0.0249877	0.0251547	0.0370494	0.0423516
	M21		0	0	0	0	0	0	0	0	0	0.00232699	0.00233534	0.00183137	0.0151543	0.0161166	0.0121628	0.0172562	0.0197886	0.0303294
	M22		0	0	0	0	0.000115867	0	0	0	0	0.00110073	0.00125294	0.00130227	0.00925823	0.00885316	0.00804231	0.00942823	0.0170965	0.0170119
	M23		0	7.39562e-08	0	0	0	0	0	0	0	0.000810355	0	0.000529636	0.00564593	0.00620803	0.00529905	0.00649202	0.00832037	0.0106084
	M24		0	1.7048e-06	0	0	0.000254851	0	0	0	0	0	8.88728e-05	0.000291491	0.00391382	0.00394834	0.00263445	0.000850957	0.00472957	0.0061692
	M25		0	0.000840147	0.00250865	0	0.00171454	0	0	0.000146373	0	0	0.000120559	0	0.00158254	0.00205578	0.000887	0	0.000336947	0.00187592
	M26		0	0	6.20389e-05	0.000158225	3.99494e-05	0	0	7.17294e-05	0	0	0.000349722	0.000110135	0.000791661	0.000717012	0.000536475	0.000498684	0.000909681	0.000285329
PC(36:4)	M0		7.46193	7.41963	7.43959	6.77093	6.83625	6.80603	4.5928	3.93249	4.50149	2.82797	2.63669	2.42586	2.11161	1.87067	1.87443	0.97258	0.864438	1.12763
	M1		0	0	0	0.16709	0	0.134112	0.411031	0.434298	0.423089	0.215442	0.229016	0.278675	0.135983	0.126136	0.158612	0.129327	0.110982	0.142868
	M2		0	0	0	0.0883576	0.0951314	0.0869412	1.0107	1.04799	0.979778	0.532343	0.525735	0.544957	0.266806	0.253164	0.28772	0.203007	0.143199	0.177058
	M3		0	0	0	0	0.00557702	0.00391562	0.284739	0.370997	0.311488	0.417234	0.439477	0.449675	0.295384	0.297901	0.299475	0.283701	0.230748	0.248443
	M4		0	0	0	0.00510693	0.00954549	0.00508949	0.416401	0.515508	0.440501	0.563356	0.584081	0.593251	0.379481	0.381008	0.391858	0.348877	0.274666	0.276075
	M5		0	0	0	0.00371291	0.00299016	0.000369295	0.145877	0.248291	0.167856	0.450625	0.461158	0.467525	0.390349	0.39723	0.41329	0.416063	0.356205	0.348179
	M6		0.000143571	0	0.000277772	0	0.00383831	0.00179638	0.154515	0.23922	0.168751	0.479926	0.523608	0.521016	0.445069	0.474361	0.492821	0.469903	0.414448	0.408837
	M7		0.000117179	5.55548e-05	0.000140119	0.000466553	0.00152691	0	0.0670622	0.112221	0.0710041	0.368916	0.39795	0.440014	0.422783	0.437631	0.427456	0.490991	0.473401	0.448484
	M8		0	9.70007e-05	0	0.000104618	0.00595698	0.000484229	0.0550928	0.101237	0.0702761	0.35624	0.37251	0.369896	0.454562	0.48522	0.493435	0.504861	0.465653	0.445164
	M9		7.0604e-06	0.00035609	0.000721092	0	0.000862253	0	0.0257054	0.0493741	0.027005	0.262733	0.28879	0.319434	0.408118	0.426433	0.427129	0.485811	0.481328	0.459478
	M10		0.00350873	0.00304866	0	0.0142705	0.0268912	0.0101057	0.0184245	0.0397235	0.021797	0.230344	0.253997	0.263608	0.373086	0.4137	0.386221	0.49793	0.475255	0.440348
	M11		0	9.63926e-05	0.000595236	0.00112767	0.00197387	0	0.00753308	0.0174255	0.011735	0.181886	0.202777	0.210853	0.343701	0.346477	0.35508	0.474063	0.519795	0.456978
	M12		0.0338305	0.0278289	0.0268079	0.0926106	0.185049	0.0634286	0.00700504	0.0145884	0.0107268	0.144408	0.163606	0.169082	0.301863	0.331302	0.314738	0.457767	0.490382	0.408355
	M13		0.00268313	0.00257282	0.00635605	0.00668879	0.0185525	0.00613519	0.00441876	0.00811407	0.00452642	0.114883	0.130893	0.12454	0.268513	0.288659	0.273963	0.402243	0.450703	0.410966
	M14		0.0021257	0.000243718	0	0.00119272	0.0114441	0.00128033	0.00702598	0.00484684	0.00162235	0.0818673	0.0952199	0.113583	0.229695	0.246492	0.244757	0.360435	0.420324	0.373995
	M15		0	0	0	0	0	0	0.00162751	0.0025264	0.00197875	0.0620166	0.0719849	0.0731566	0.199512	0.215625	0.202184	0.299238	0.34839	0.330292
	M16		0	5.13361e-05	0	0	0	0	0.000653805	0.00193092	0.000773032	0.0472748	0.0542358	0.0595633	0.151579	0.164754	0.160003	0.22812	0.309375	0.286726
	M17		0	0.000140296	0.000138675	0	0	0	0	0.00109361	0	0.030863	0.0387772	0.0410164	0.126287	0.129208	0.118896	0.182662	0.238937	0.230941
	M18		0	8.52592e-05	0.00019085	9.26351e-05	0.000197084	0.000240032	3.03344e-06	0.00024838	0.000141036	0.0210353	0.0233832	0.0276501	0.0908794	0.0999451	0.088723	0.13017	0.169292	0.175041
	M19		0	0	0	0.000530747	0	2.52263e-05	0.000761283	0.000396941	0	0.0141642	0.0167463	0.0177309	0.0626458	0.0688023	0.060651	0.0925416	0.127707	0.135082
	M20		0	0	0	9.91284e-05	0.00271588	4.56758e-05	0	0	0	0.00822028	0.0104771	0.00972335	0.0445299	0.0471517	0.0419648	0.0603876	0.0820908	0.0863308
	M21		0	0	0.000255363	0.000111152	0.000408729	0	0	0	0	0.0064889	0.00723319	0.00639449	0.0296911	0.0283022	0.0254462	0.032992	0.0548714	0.0598069
	M22		0.0121627	0.0945332	0.069831	0.330025	0.287116	0.352254	0.205217	0.272947	0.233134	0.00323416	0.00360701	0.0038787	0.0156249	0.0190306	0.0142388	0.0236729	0.0304814	0.0434836
	M23		0.0534949	0.0186428	0.0215812	0.0757948	0.0655197	0.0855415	0.0943701	0.0802504	0.0678997	0.109407	0.00217541	0.00200022	0.0112504	0.0117339	0.00920421	0.0128601	0.020652	0.0233723
	M24		0	0.00261511	0.00289374	0.0116915	0.00842705	0.0122033	0.0590312	0.0742759	0.0544278	0.0391226	0.0358766	0.0369143	0.00551255	0.00423072	0.00447786	0.00521144	0.00924885	0.0125079
	M25		0	0	0	0	0	0	0	0	0	0	0	0	0.00303371	0.00301239	0.0021182	0.00331225	0.00570364	0.00748647
	M26		0	0	0	0	0	0	0	0	0	0	0	0	0.00207962	0.00155151	0.000988071	0.000688727	0.00152314	0.00391031
	M27		0	0	0.00062414	0	3.04394e-05	0	0	0	0	0	0	0	0.000371146	0.000265132	0.000116205	0.00058453	0.00020058	0.00216002
PC(36:5)	M0		8.57321	8.57266	8.57725	8.51917	8.37145	8.48452	6.11604	5.54584	5.98834	3.10977	2.92032	2.94072	2.20394	2.01054	2.06751	1.08417	0.935007	1.09333
	M1		0	0	0	0	0.0376291	0	0.361833	0.381947	0.357221	0.360391	0.353748	0.325744	0.19569	0.187562	0.177709	0.12844	0.11486	0.133495
	M2		0	0	0	0.0353439	0	0.0691299	1.13662	1.23016	1.13716	0.698866	0.698264	0.719476	0.404384	0.393076	0.414326	0.258104	0.194837	0.210741
	M3		0	0	0	0	0	0	0.23008	0.321445	0.256195	0.591184	0.553498	0.556788	0.412196	0.415316	0.418884	0.330102	0.269639	0.277843
	M4		0	0	0	0	0.00665895	0	0.38109	0.469792	0.418765	0.714513	0.727188	0.71382	0.543114	0.555392	0.574967	0.443445	0.344361	0.366989
	M5		0	0	0	0	0.00464168	0	0.114888	0.180263	0.130754	0.552025	0.57882	0.568827	0.523173	0.543093	0.536553	0.508814	0.437608	0.416034
	M6		0	0	0	0	0.00339602	0.000473913	0.116102	0.179876	0.129214	0.536913	0.563193	0.609985	0.641951	0.646129	0.647508	0.569973	0.51983	0.535277
	M7		0	0	0	0.000765282	0.00247651	0.00063428	0.0386797	0.0750282	0.0542437	0.449906	0.452309	0.460928	0.561015	0.550641	0.551739	0.580448	0.541827	0.554156
	M8		0.000582928	0.000305735	0	0.00573015	0.00960249	0.00539768	0.0358884	0.0589076	0.0408053	0.390059	0.412345	0.417575	0.543639	0.574055	0.558394	0.569604	0.585087	0.550677
	M9		0.000351711	6.87481e-05	0.000100079	0.00127619	0.00327805	0.000606029	0.0135955	0.031422	0.0188167	0.265114	0.29086	0.29779	0.459843	0.485493	0.488288	0.574878	0.553976	0.548113
	M10		0.0032784	0.00660925	0.00672247	0.0100428	0.0256635	0.0119767	0.0133445	0.024822	0.0169032	0.249042	0.262154	0.268522	0.414865	0.434168	0.430675	0.520386	0.559664	0.519489
	M11		0	0	0	0	0	0	0.00336416	0.00825337	0.00481716	0.174715	0.194348	0.192243	0.342636	0.371219	0.353756	0.497869	0.540818	0.486955
	M12		0	0	0	0	0	0	0	0.00193926	0	0.110382	0.120899	0.111269	0.26766	0.251679	0.266067	0.467534	0.476267	0.453522
	M13		0	0	0	0	0	0	0	0.0016189	0.00321395	0.0909914	0.102329	0.105515	0.233908	0.27053	0.255642	0.432111	0.474948	0.440714
	M14		0	0	0	0	0	0	0	0	0	0.075214	0.0889353	0.0933149	0.208808	0.222089	0.216862	0.384283	0.453334	0.412728
	M15		3.20067e-05	2.58284e-05	1.30496e-05	0.000118513	0.000412433	5.97741e-05	5.13048e-05	0	0	0.0559733	0.0605025	0.0553645	0.172979	0.188241	0.168133	0.323121	0.395059	0.366649
	M16		0.00326589	0.00248774	0.00154994	0.0141508	0.0399263	0.00886632	0.0100718	0.011187	0.00965108	0.0333649	0.0405533	0.0439838	0.128736	0.148532	0.131293	0.266691	0.326348	0.317002
	M17		0	0	0	0	0	0	0	0	0	0.0268919	0.0292626	0.029625	0.0966218	0.0972691	0.103548	0.200924	0.265559	0.255626
	M18		0.000162414	9.60443e-05	0	0.000444014	0.00076653	0.000944004	0.00243183	0.00383151	0.00298615	0.0174111	0.0181308	0.0199122	0.0725234	0.0797433	0.0730813	0.157671	0.181847	0.196287
	M19		0	0	6.98598e-05	4.57211e-05	0.000583888	0	0.000424145	0.000878485	0	0.00882301	0.0124169	0.0128272	0.0524899	0.0560788	0.0545915	0.10625	0.143432	0.158107
	M20		0.000218053	0.00020145	0.000207957	0.000161428	0.00582007	0.000493076	8.52605e-05	0.000687385	0.000485272	0.00609576	0.00806869	0.00786166	0.0328672	0.0349193	0.0331852	0.0632375	0.0962561	0.114095
	M21		0	0	0	0	0.000298314	0	8.16835e-05	0.000124521	1.57521e-05	0.00405971	0.00342572	0.00434405	0.0242815	0.0236647	0.0238842	0.0441735	0.0640289	0.0732373
	M22		0.000425446	0.000490405	0.000377484	0	0.000123894	0.000220969	0.000500862	0.000570894	0.000459867	0.00230249	0.00326357	0.000981365	0.0125516	0.013541	0.0102005	0.0237334	0.0367063	0.0473552
	M23		0	0	0	0	0.000485462	0.000450702	2.86957e-05	4.5515e-05	0	0.00727905	0.00338781	0.00694596	0.00819996	0.00880941	0.00755657	0.0173923	0.0220635	0.0275613
	M24		8.76803e-05	0.000361478	0	6.30044e-05	0.00260546	0.000316603	9.34519e-05	7.35283e-05	0.000834947	0.00384149	0.00394678	0.00354421	0.00416484	0.00352178	0.00452269	0.00748669	0.0136701	0.0166733
	M25		9.6544e-05	0.000278316	0	0	0	0	0	0	0	0.00212309	0.00226462	0.00213341	0.00263436	0.00183914	0.00220115	0.00343536	0.00497675	0.0108694
	M26		0.00828569	0.00641073	0.0028622	0.00244741	0.0741843	0.0059079	0.000451731	0.0297046	0.00244576	0.00274255	0.0562612	9.50906e-05	0.00104014	0.000795281	0.00765564	0.00169123	0.00176699	0.00463075
	M27		0	0	0.000842549	0.000243974	0	0	0.0142448	0.0315752	0.0166673	0.0500076	0.0293017	0.0198639	0.0240903	0.0220644	0.0112665	0.0240386	0.036223	0.00184465
PC(36:6)	M0		5.00412	4.98515	5.00466	5.02254	4.98722	5.02401	4.36805	4.17096	4.28806	2.57979	2.50389	2.50198	1.68697	1.59136	1.66139	0.775109	0.702678	0.771672
	M1		0	0	0	0	0	0	0.0889664	0.0592395	0.0690783	0.207829	0.239961	0.250339	0.15206	0.128641	0.129273	0.102018	0.0802651	0.0895403
	M2		0	0	0	0	0	0	0.369039	0.472415	0.410707	0.495331	0.454411	0.43974	0.316601	0.296222	0.307068	0.152017	0.131907	0.124391
	M3		0	0	0	0	0	0	0.0582038	0.0790859	0.0713533	0.279058	0.275786	0.296328	0.281622	0.268076	0.272669	0.188495	0.16256	0.171037
	M4		0	0	0	0	0	0	0.081401	0.142771	0.106629	0.361117	0.364373	0.327439	0.330627	0.34261	0.336996	0.236517	0.206541	0.189009
	M5		0	0	0.000620844	0	0.00091144	0	0.0232845	0.0293767	0.0257762	0.225252	0.233381	0.243753	0.285296	0.271831	0.27955	0.275951	0.244641	0.24419
	M6		0.000674434	0.0016946	0.000436659	0.00049943	0.00213309	3.60869e-06	0.0244539	0.0393614	0.0319596	0.239312	0.249631	0.239962	0.338211	0.344228	0.343902	0.328374	0.290237	0.287854
	M7		0	0	0	0	0.000782887	1.83886e-05	0.00856719	0.0108248	0.0125501	0.15517	0.174835	0.174538	0.267962	0.283807	0.275487	0.33015	0.313113	0.307821
	M8		0.00480082	0.00803106	0.00528375	4.61694e-05	0.00206765	0.000407998	0.00538322	0.0134379	0.00763567	0.135732	0.135907	0.150696	0.268084	0.283396	0.275165	0.33366	0.334206	0.316037
	M9		4.47371e-05	0.000502054	0.000296564	0	0	0	0.00276122	0.00549542	0.00542569	0.103004	0.106479	0.110676	0.218795	0.226242	0.217647	0.317434	0.316958	0.31142
	M10		0	0.00150195	0.0103746	0	0.000711601	0	0.00204631	0.00316005	0.00182181	0.0718743	0.0894873	0.0878966	0.188593	0.204237	0.191382	0.291543	0.306802	0.295705
	M11		0	0.000182998	0.000364739	4.01584e-05	0	0	0	0.00163988	0.000913152	0.0534216	0.0551478	0.0545007	0.152061	0.173431	0.165466	0.27637	0.287481	0.274164
	M12		0.00456015	0.00681487	0.00288838	0.00559962	0.0259936	0.00364526	0.0029646	0.00673684	0.00194593	0.040992	0.0464174	0.047443	0.12943	0.143116	0.13168	0.252608	0.280584	0.258484
	M13		0.000356921	0.00075617	0	0.000378536	0.000677463	6.88828e-05	0	0.000151159	0.000575735	0.0293248	0.0335694	0.0326743	0.105367	0.11747	0.111712	0.229793	0.255025	0.239578
	M14		0.0104615	0.0144281	0.00664737	0.00462843	0.00707061	0.00434039	0.00117642	0.00105355	0.00183744	0.0197727	0.0269478	0.0272204	0.0787738	0.0960309	0.0911828	0.210311	0.236132	0.220584
	M15		0.00144596	0.00148907	0	0	0	0	0	0.000105184	0.000222336	0.0153561	0.0155673	0.0171096	0.0706628	0.0764789	0.0724334	0.180449	0.203532	0.194267
	M16		0	0	9.3925e-06	0	0	0	0.000256523	0.000244565	0	0.011426	0.0130159	0.0131904	0.0514465	0.0598474	0.0537313	0.153657	0.183377	0.179566
	M17		0	0	0.00113601	0	1.7756e-05	2.14524e-05	0	7.19562e-05	2.89745e-05	0.0065715	0.00833341	0.00891426	0.0381484	0.0422026	0.0395207	0.119202	0.151301	0.149552
	M18		0	0	4.77078e-05	0	0.000231708	0	0	0	4.18656e-05	0.00361542	0.00503258	0.00644344	0.0288674	0.0351368	0.0310012	0.100213	0.11625	0.121207
	M19		0.000185226	0	0	8.45177e-05	0.000449978	0	5.37588e-06	1.5786e-05	0	0.00301411	0.00330684	0.00276025	0.0183745	0.0193352	0.0207671	0.0656448	0.0836931	0.0972468
	M20		0.0014238	0.001147	0.000200824	0.00122878	0.00238826	0.00118622	0.000539069	0.000433483	0.000702308	0.00117576	0.00222161	0.00241248	0.0131178	0.013703	0.0124781	0.0472799	0.0576068	0.0715009
	M21		4.76442e-07	1.16852e-05	0.000127945	0	0.000392653	5.17944e-05	3.51284e-05	0	0	0.000754478	0.000752494	0.00158257	0.00737326	0.00882381	0.00745816	0.0301278	0.0410709	0.0464901
	M22		0.00290654	0.00436969	0.00250252	0.00146185	0.00128657	0.00201633	0.000938537	0.000689769	0.000800118	0.000485887	0.000849105	0.00107478	0.0052634	0.00551634	0.00538043	0.018985	0.0238557	0.0314529
	M23		0.000705169	0.00087209	0.000158287	0.000447828	8.4216e-05	6.06905e-05	0.000211827	0.000219884	0.0002397	0.000315386	0	0	0.00232775	0.00269647	0.0023202	0.0119031	0.014723	0.0222667
	M24		0.00575643	0.00944314	0.00314229	0.00129197	0.00177789	0.00320072	0.00100513	0.00184498	0.00103673	2.5082e-05	0.000186801	9.23001e-05	0.00205993	0.0020867	0.000993945	0.00605575	0.00807256	0.012415
	M25		0.00127084	0.00218875	0.00110661	0.000797983	0.000301013	0.000204442	0.000289448	0.000407453	0.000240579	8.60493e-05	0.000185119	7.67054e-05	0.000448522	0.000571121	0.000543802	0.00442642	0.00418498	0.00665286
	M26		0	0.000175218	0	0.000386471	0.00196177	0.000171531	0.000190738	0.00026078	0.000281735	0.000179593	7.87975e-05	0.000100269	0.000380533	0.000438943	0.000424461	0.00126261	0.00209898	0.004112
	M27		0.00128797	0.00124105	0	0.000572043	0.00354405	0.000588511	0.000232835	0	0.000139017	1.25914e-05	0.000247732	0.00105381	0.00107899	0.00246871	0.00237445	0.000443672	0.0011028	0.00178382
PC(38:2)	M0		0.0198397	0.019116	0.0182556	0.0190162	0.0183284	0.0187731	0.0120158	0.0111935	0.0121792	0.00663772	0.00750312	0.00714761	0.00523511	0.0057233	0.00636422	0.00197007	0.00174694	0.00224697
	M1		0	0	0	0	0	0	0.000763527	0.000556139	0.000569853	0.000420456	0.000308047	0.000417779	0.000457874	9.06331e-05	0	0	5.44143e-06	0
	M2		0	0	0	0.000710764	0.00051376	0.000689595	0.00245817	0.00209339	0.0022106	0.000906925	0.000908682	0.000657293	0.000250849	0.000548975	0.000606879	0.00019644	0.000264675	0.000171069
	M3		0	0	0	8.05478e-05	0	0.000132096	0.000820689	0.000837218	0.00103478	0.00075798	0.00077847	0.000730005	0.000627768	0.000434675	0.000397858	0.000479454	0	0.000248241
	M4		0	0	0	0	0	1.72694e-05	0.00134926	0.00142255	0.0010968	0.0010631	0.000968811	0.000927692	0.000541643	0.000554504	0.000675147	0.000208697	0.000520553	0.000179542
	M5		0	0	0	2.59598e-05	0	1.24343e-05	0.00064216	0.000684017	0.000699461	0.000953648	0.000922561	0.000946092	0.000716176	0.00068365	0.000592534	0.000449248	0.000758756	0.000646079
	M6		1.76902e-06	8.43728e-06	0.000280714	0	0	0	0.000637546	0.000801807	0.000659794	0.00116523	0.00100991	0.00108782	0.000799299	0.000901662	0.000887811	0.000419493	0.0007419	0.000761056
	M7		0	1.52602e-06	0	8.40915e-06	3.32412e-05	0	0.000398036	0.00053068	0.000375723	0.00109096	0.00105849	0.000930914	0.000895158	0.00107333	0.00113462	0.00139764	0.000951142	0.00105213
	M8		1.01012e-07	1.36014e-05	0	0	2.18638e-05	0	0.000290263	0.000463471	0.00029587	0.00108872	0.000919113	0.00105142	0.00101798	0.000866162	0.000656787	0.00143422	0.00108907	0.00113807
	M9		9.38865e-06	0.000137185	0.000275887	0	0	4.00512e-06	0.000192413	0.00031144	0.000233094	0.000975769	0.000984396	0.00105182	0.000841874	0.00114927	0.00122329	0.00189033	0.00143332	0.0013889
	M10		0	0	0.000171605	0	0	0	0.000150878	0.000240504	0.00017678	0.000951304	0.00082848	0.000810596	0.00114689	0.000933166	0.000862203	0.00176716	0.00148659	0.00129715
	M11		0	0.000489236	0	0	4.13967e-05	0.000194255	7.16983e-05	0.000164137	0.000123751	0.000817409	0.000807632	0.000818672	0.000993988	0.00103875	0.00104966	0.00186635	0.00154543	0.00160293
	M12		0.000113975	0.000107178	5.58874e-05	0.000109015	0.000322486	5.0961e-05	0.000139353	0.000184444	0.000194473	0.000812538	0.000779875	0.000960702	0.0012219	0.000935545	0.000888286	0.00191092	0.00172923	0.00134585
	M13		1.10804e-06	0	0	1.07609e-05	1.96508e-05	0	3.5754e-05	0.000100905	4.91665e-05	0.000615738	0.000608813	0.000579476	0.0010911	0.00106995	0.00117018	0.00131748	0.00144924	0.00155637
	M14		0	1.56021e-06	0	0	5.76399e-05	0	0	2.84937e-05	1.71768e-05	0.000481729	0.000486029	0.000529957	0.000784402	0.000940874	0.000724465	0.00141284	0.00143773	0.00153231
	M15		0	5.66465e-06	0.000888144	0	1.54883e-05	0	6.96471e-06	2.22012e-05	1.51764e-06	0.000376845	0.00042268	0.000457572	0.00094147	0.000816463	0.000957441	0.000600024	0.00133367	0.00135259
	M16		3.67872e-06	0	0	3.83645e-05	0	0	1.93802e-05	1.3452e-05	2.73985e-05	0.000305972	0.000275868	0.000260705	0.00075846	0.00061509	0.000548827	0.00151617	0.00096335	0.00102902
	M17		2.37047e-05	0	0	0	9.92928e-06	4.87363e-06	7.4003e-06	7.20647e-06	0	0.000180383	0	0.000208115	0.000560659	0.000576058	0.000457795	0.000300173	0.00081537	0.000645257
	M18		0	8.02384e-06	4.66767e-05	0	2.94333e-05	0	0	0	0	0.000184456	0.000236668	0.000128837	0.000540716	0.000425827	0.00043587	0.000590862	0.000732178	0.000577729
	M19		4.66064e-06	0.00011163	0	0	0.000444831	0.000121371	7.29826e-07	0.000316509	5.43468e-05	9.14395e-05	9.89832e-05	0.000198917	0.000203577	0.000149168	0.000119359	0	0.000450304	0.000703145
	M20		1.89997e-06	0	0	0	0.000161887	0	0	2.43792e-05	0	5.95656e-05	6.93149e-05	6.11616e-05	0.000200273	0.000269653	0.000110329	0.000260916	0.00030198	0.000306389
	M21		0	0	0	0	0	0	0	3.60239e-06	1.92086e-07	5.02347e-05	2.4055e-05	3.06256e-05	0.000107967	0.000115435	0.00013644	1.15274e-05	0.000139899	0.000126336
	M22		0	0	2.54364e-05	0	0	0	0	0	0	1.1872e-05	0	6.21197e-06	6.4868e-05	8.78539e-05	0	0	0.000103229	9.2851e-05
PC(38:3)	M0		0.70766	0.703262	0.68181	0.7009	0.68156	0.702665	0.466698	0.423239	0.468139	0.228445	0.231143	0.223914	0.143287	0.134552	0.139231	0.0736184	0.0670444	0.0707409
	M1		0	0	0	0	0.00259787	0	0.0316111	0.0327418	0.027402	0.0213668	0.0215154	0.022274	0.00928258	0.00683809	0.00655109	0.00826654	0.00616859	0.00634174
	M2		0	0	0	0.0078675	0.00734629	0.00417713	0.0860408	0.0874209	0.0858044	0.0438336	0.040999	0.0421639	0.0216465	0.0213755	0.0219945	0.0219358	0.010514	0.0117665
	M3		0	0	0	0	0	0.00035504	0.0278042	0.0337024	0.0248612	0.037622	0.0356504	0.0315456	0.0222382	0.0181711	0.0243038	0.0147973	0.015812	0.0165543
	M4		0	0	0	0.000319845	0.000722831	0.00141082	0.0381991	0.0449609	0.0395708	0.0429868	0.0413219	0.0469314	0.0292378	0.030539	0.0271417	0.0210358	0.0174858	0.0194672
	M5		0	0	0	0.000107759	0.000234717	0	0.0175882	0.0214463	0.0181985	0.0393046	0.0401472	0.0364079	0.0297569	0.0294396	0.0359119	0.0331894	0.0257564	0.0219926
	M6		0.000386273	0.000141206	0	0.000123125	0.00243944	9.57694e-05	0.015902	0.02396	0.0177368	0.0444375	0.042005	0.042349	0.038087	0.0360145	0.0368415	0.0351483	0.0332683	0.0333921
	M7		0	3.79939e-05	0.000193997	0	0	0	0.00834302	0.0118782	0.0086502	0.03866	0.03708	0.0389973	0.038447	0.0404402	0.041573	0.0438836	0.0361672	0.0394268
	M8		1.40746e-05	0	0	0	0	0	0.00687079	0.0110431	0.00752503	0.0364034	0.0360448	0.0380021	0.0435615	0.044642	0.0395898	0.0428082	0.0414952	0.0377933
	M9		5.95374e-05	0	0	0	0	0	0.00406873	0.00640506	0.00397843	0.0337639	0.0336932	0.0329182	0.0390295	0.0401498	0.0464569	0.0517095	0.0468435	0.0431673
	M10		2.89132e-05	0	0	0	0.000192052	0	0.00318055	0.0051272	0.00366647	0.0295012	0.0298528	0.0319714	0.0416676	0.0457512	0.0402278	0.0450685	0.0467376	0.0466853
	M11		0.000184323	0.00267424	0.00874188	1.7014e-06	0.000203298	0.000218793	0.00121488	0.00269754	0.00153394	0.024755	0.0257204	0.0248972	0.0391604	0.0412312	0.0386528	0.0501982	0.0481951	0.0497175
	M12		0.000614007	0.000744795	0.000560268	7.03134e-05	0.00106108	0.000146963	0.00102431	0.00230213	0.000706152	0.0217755	0.0222853	0.0233464	0.0392124	0.0391346	0.0418925	0.0417504	0.053282	0.0451298
	M13		0.000220651	0.000726954	0.00095275	0	0.00729001	0.000510581	0.00072349	0.00125391	0.00107798	0.0158861	0.0185177	0.0197028	0.0358017	0.0375875	0.033986	0.0505839	0.0489678	0.0434831
	M14		0	0.000238282	0	0	0.0034463	7.42104e-05	0.000404255	0.00084616	0.000619761	0.0155089	0.0153609	0.0144631	0.0293734	0.0330885	0.0304285	0.0411482	0.0444799	0.0467261
	M15		0	0.000407767	0.000476636	1.57448e-07	1.10351e-05	0	7.00987e-05	0.000358277	6.8902e-05	0.0112553	0.0120174	0.0113028	0.0276153	0.0264574	0.0266294	0.0376924	0.0415732	0.0370942
	M16		3.29825e-06	8.47369e-05	0	0.000405469	0	0.000130172	6.64685e-05	0.000220514	0	0.00738683	0.00848384	0.0101109	0.0237925	0.0236064	0.0213052	0.0300156	0.0323743	0.0372942
	M17		0.000533789	0.000553089	0.0123587	0	0.000452361	0	0.000123847	0.000335054	6.13627e-05	0.00585946	0.00675951	0.00717643	0.016745	0.0181502	0.0170754	0.0236195	0.0281079	0.0283155
	M18		0	3.90729e-05	0.00102979	8.9577e-05	0.000696246	0	1.23118e-05	0	0.000142039	0.00431247	0.0043182	0.0042289	0.0141321	0.0144837	0.0131747	0.0169139	0.021324	0.0237584
	M19		0	0	0.000423882	0	0.000240916	0	0	0	0	0.00296976	0.00316223	0.0029396	0.00919991	0.00989901	0.00948449	0.0125725	0.0156074	0.0184494
	M20		0	0.000183088	0.000988565	0	0	4.3559e-07	0	0	0	0.00166678	0.00180621	0.00222442	0.00711204	0.00693003	0.0068382	0.00439959	0.0109418	0.0128233
	M21		0	0	6.41529e-05	0	0.00125582	7.75436e-05	0	3.43201e-05	0	0.000998425	0.00120925	0.00101088	0.00439413	0.00450354	0.00493128	0.00498395	0.00755158	0.00798165
	M22		1.92255e-07	1.85642e-05	0	1.24513e-07	0.000142188	0	0	3.085e-06	0	0.000758752	0.000588456	0.000711172	0.00372774	0.00316289	0.00283056	0.00263808	0.00514051	0.0050164
	M23		4.97151e-05	0.000224056	0.00149108	4.20216e-05	0	0	0	0	6.26853e-08	0.000288711	0.000317665	0.000236872	0.00167711	0.00173597	0.00134842	0.00144267	0.0031615	0.00354745
	M24		0	0	0	0	3.55071e-05	0	0	0	8.98607e-07	8.49276e-05	0	1.08284e-05	0.000739766	0.00122885	0.000615559	0.000236898	0.00131826	0.00192124
	M25		0.000242843	0.000616329	0.000883427	0	0	0.000137045	0	1.43375e-05	0.000255712	0.000155095	0	0.0001538	0.000709297	0.000704883	0.000837967	0.000342864	0.000681718	0.0014137
	M26		2.19082e-06	4.77129e-05	2.44915e-05	7.22715e-05	7.25204e-05	0	5.40127e-05	1.02466e-05	0	1.37626e-05	0	8.78955e-06	0.000365896	0.000182214	0.000146468	0	0	0
PC(38:4)	M0		2.05284	2.052	2.02047	2.04642	1.9941	2.04858	1.59385	1.49553	1.54636	0.718056	0.738527	0.707028	0.412662	0.376442	0.387012	0.202641	0.183252	0.198381
	M1		0.000363424	0	0	0	0.0100882	0	0.0764839	0.0766785	0.078481	0.0826029	0.0826681	0.0665359	0.0352421	0.034134	0.0365376	0.0227481	0.0203673	0.0200339
	M2		0	0	0	0.000525969	0.00373228	0	0.191288	0.209575	0.202871	0.177213	0.177901	0.176381	0.0835628	0.081511	0.0823917	0.0394205	0.0317789	0.0337503
	M3		0	0	0	0	0	0	0.05369	0.0681795	0.0593555	0.127934	0.114985	0.123964	0.0902404	0.0808514	0.080744	0.0588285	0.0459831	0.04801
	M4		0	0	0	0	0.00112673	0	0.0692552	0.091477	0.077862	0.164362	0	0.158937	0.114797	0.121369	0.119971	0.0754984	0.0646271	0.0665684
	M5		0	0	0	0.000188796	0.0213031	0.000755401	0.0234352	0.0374498	0.0286677	0.132517	0.213122	0.13167	0.123158	0.117612	0.118481	0.0973779	0.0800663	0.0786997
	M6		0	0	0	0	0	0	0.0251796	0.0328707	0.0304848	0.133332	0.125733	0.127619	0.137665	0.138489	0.143331	0.130693	0.108624	0.109542
	M7		0	0	0	0.000118818	0	0	0.00761663	0.0170659	0.0126131	0.107058	0.120072	0.112076	0.133374	0.128869	0.137154	0.121471	0.120165	0.115449
	M8		0	2.92004e-06	0	0	0	0	0.00676439	0.0125694	0.0107073	0.0951258	0.107035	0.100773	0.135072	0.135761	0.133408	0.145388	0.130597	0.130952
	M9		3.30772e-06	0.000136289	0.000590617	0	4.47491e-05	6.02514e-05	0.00415387	0.00699312	0.00475827	0.0733751	0.0860396	0.0759843	0.124527	0.126826	0.124905	0.132169	0.135505	0.135227
	M10		0.000119286	0	0	9.72617e-05	0.000411803	0	0.00271229	0.00515095	0.00425935	0.0627779	0.0672745	0.0670607	0.11281	0.127341	0.122953	0.136025	0.139045	0.125896
	M11		0	2.95385e-05	0.000300637	0	0	0.000179821	0.000981569	0.00294573	0.00128808	0.0492959	0.0598213	0.0557585	0.110549	0.107139	0.109164	0.147275	0.134767	0.129187
	M12		0.00560436	0.00374213	0.00340878	0.0110675	5.72972e-06	0.00951887	0.00102092	0.00197746	0.000886498	0.0344916	0.0426641	0.0394591	0.0883594	0.100226	0.0977879	0.129265	0.136605	0.124844
	M13		7.36795e-05	0.00066003	0	0.00127885	0.000139412	0.000816198	0.00260013	0.000726201	0.000552175	0.0309464	0.0360381	0.0345406	0.0776374	0.0822852	0.0819334	0.120061	0.127679	0.120379
	M14		0.000900488	0.000162175	0	0	0.0209921	0	0	0.000510417	0.000264895	0.0223785	0.027722	0.0243781	0.0669425	0.0719704	0.0700849	0.105401	0.127988	0.121339
	M15		9.07072e-05	0.00116764	0.00329753	0.000242279	0.0031898	8.69747e-05	0.000927459	0.000199398	0.000588956	0.016017	0.0204017	0.0170478	0.055373	0.0590581	0.056094	0.0965378	0.107212	0.108174
	M16		0	0	0	5.77639e-05	0	0	0	2.73544e-06	0	0.0091475	0.0135002	0.0144338	0.0446294	0.048325	0.048961	0.0780774	0.0942276	0.0909195
	M17		0	0.000665926	0.00118524	0	0	0	0	0	0	0.00915782	0.010071	0.0104577	0.0361798	0.0389967	0.0338946	0.0663423	0.0760083	0.0788177
	M18		0	8.30158e-05	0.000559097	0	0.00450508	0	0	9.62046e-05	0	0.00581885	0.00648445	0.00540646	0.0242839	0.0268719	0.0239118	0.0480929	0.0607321	0.0688895
	M19		0	0.00104661	0.0230404	0	3.81619e-05	0	0	0	0	0.00385402	0.00448053	0.00532134	0.0177682	0.0205389	0.0183347	0.0406489	0.0480771	0.0495804
	M20		0	0	0.00168216	0	0	0	0	0	0	0.00220767	0.00260869	0.00221455	0.0142453	0.0128079	0.0134986	0.0273362	0.0294782	0.0335534
	M21		0	4.91064e-05	0	0	0	0	0	0	0	0.00157047	0.00126395	0.00165983	0.00885917	0.0105076	0.00800848	0.0152689	0.0239683	0.0278888
	M22		0	0	0.00180521	0	0	0	0	0	0	0.000447216	0.00111379	0.000985836	0.00497198	0.00533071	0.00534516	0.0105072	0.0144311	0.0181914
	M23		0	7.7236e-05	0	0	4.10791e-10	0	1.33878e-08	0	0	0.000109724	0.000469096	0.000108516	0.00359888	0.00320963	0.00344151	0.0074597	0.00815627	0.011494
	M24		0	0	0	0	0.000142683	0	1.46854e-07	0	0	7.55376e-05	0	0.000125854	0.00232363	0.00207646	0.00123573	0.00330585	0.00586742	0.00728636
	M25		0	0.000106813	0.00338095	0	0	0	4.21694e-05	0	0	8.22616e-05	0	0	0.000913768	0.00114501	0.00097848	0.00127735	0.00352545	0.00466343
	M26		0	7.23969e-05	0.000283897	0	0.000176594	0	0	0	0	4.5583e-05	4.27242e-06	7.27685e-05	0.000254179	0.000306769	0.000435962	0.000882587	0.00126823	0.00228463
PC(38:5)	M0		0.942745	0.939837	0.945323	0.900967	0.842429	0.908191	0.806796	0.752315	0.780874	0.441468	0.421509	0.424029	0.249636	0.223201	0.231579	0.1201	0.116667	0.117436
	M1		0	0	0	0	0.00323266	0	0.0197851	0.037629	0.0390842	0.0397474	0.0390097	0.0397618	0.0226779	0.0200222	0.0247664	0.0130639	0.0118536	0.0130899
	M2		0	0	0	0	0	0	0.0599864	0.0700751	0.0606403	0.0934678	0.0897442	0.0867547	0.0555145	0.0532798	0.0506263	0.0221324	0.0164662	0.0168126
	M3		0	0	0	0	0	0	0.0158129	0.0176847	0.0172877	0.0554376	0.054544	0.0591154	0.047994	0.0433371	0.0506293	0.0278918	0.0256518	0.0255677
	M4		0	0	0	0	0	0	0.0175447	0.0246753	0.021418	0.0740068	0.0756848	0.0730456	0.0660726	0.0657892	0.0605095	0.0394734	0.0305196	0.0333101
	M5		0.000157872	0.000135085	0	3.6067e-05	0.00103675	3.36074e-05	0.00490678	0.00787607	0.00811278	0.0513546	0.0539813	0.0554608	0.0622336	0.0604562	0.0583354	0.0490493	0.0419871	0.0377886
	M6		0.00172381	0.00143947	0.0014222	5.50497e-05	0.000370413	0	0.00609222	0.00809317	0.00733645	0.052826	0.0565693	0.0556434	0.0645254	0.0688926	0.0709371	0.0557775	0.0514003	0.0510716
	M7		0	0	0	0	0	0	0.00155486	0.00280252	0.00233468	0.0402017	0.0404799	0.0381694	0.0634149	0.0650266	0.0651015	0.0565846	0.0573946	0.0504805
	M8		0.00123268	0.00070917	0.000125889	8.2744e-05	1.02232e-05	0.000103858	0.00161322	0.00267494	0.00208008	0.034514	0.0387235	0.0394629	0.0583375	0.0609345	0.0610841	0.0641515	0.061645	0.0621276
	M9		0	0	4.55721e-05	0	4.31476e-05	0	0.0008091	0.00164391	0.000958685	0.0278796	0.0289253	0.0269466	0.0533517	0.0572829	0.0535941	0.0655145	0.0578868	0.0587092
	M10		0	0	0	4.6573e-05	0.000113364	5.47784e-05	0.000324106	0.000799016	0.000907321	0.0201976	0.0237285	0.0238237	0.0477212	0.0524499	0.0520105	0.0597875	0.0616485	0.0598298
	M11		0	0.000133951	0.000417872	0	1.59636e-05	0	0.000275573	0.000541558	0.000195051	0.015457	0.0178677	0.017818	0.0405235	0.0440721	0.0407694	0.0630591	0.0596703	0.0578957
	M12		0.0308017	0.0325218	0.0212859	0.060466	0.0996704	0.0502514	0.034124	0.0366167	0.0303432	0.0124608	0.0141027	0.0136824	0.0329248	0.0361663	0.0379292	0.0582528	0.0611706	0.0584099
	M13		0.00314226	0.0040841	0.00276836	0.00734103	0.0128341	0.00658973	0.00429061	0.00413838	0.00434508	0.00901076	0.0101294	0.0100163	0.0293792	0.0331164	0.0313543	0.0533251	0.0603192	0.0528689
	M14		0.000433374	0.000154793	0	0	0.000301726	0.000150032	0	0	0	0.00741486	0.00764204	0.0090325	0.0235376	0.0266149	0.02617	0.0507892	0.0559083	0.0542156
	M15		0	0	0	0	0	0	0.000132384	0	0.000193077	0.00487096	0.00559561	0.00579512	0.0201205	0.0221443	0.019443	0.0471561	0.046495	0.0477851
	M16		0	0	0	0	0	0	0	0	0	0.00387213	0.00452788	0.00376331	0.016063	0.017202	0.0163392	0.0353144	0.0428095	0.0438298
	M17		0	0	0	0	0	3.74649e-05	6.71916e-05	2.81125e-05	2.4114e-05	0.00224417	0.00272672	0.00318731	0.0110803	0.0132763	0.0130252	0.0320853	0.0350598	0.0358856
	M18		0.00976327	0.00990106	0.00346789	0.0210055	0.0298992	0.0245431	0.0158846	0.0223872	0.0138263	0.00162613	0.00173051	0.00190241	0.00874312	0.00939514	0.0091547	0.0238959	0.0311212	0.0318912
	M19		0	0	0	0	0	0	0	0	0	0.000872451	0.00122155	0.00110471	0.00590935	0.00685484	0.00612607	0.0186279	0.0216147	0.0238215
	M20		0	0	0.000774731	0	0	0	0	0	0	0.000417981	0.000665816	0.000755824	0.00437219	0.0043244	0.00395811	0.0126853	0.0149842	0.0189331
	M21		0	0.000489753	0.0103174	0	0	0	0	0	0	0.000446777	0.000543552	0.000367932	0.00240314	0.00263084	0.00299553	0.00758812	0.011452	0.0148539
	M22		0	0.000480149	0.00303476	0	0	0	0	0	0	0.000204508	0.00034704	0.00028551	0.00171797	0.00178191	0.00174437	0.00682908	0.00683003	0.00928062
	M23		0	0	0	0	4.25834e-05	0	0	0	0	9.3653e-07	0	7.55767e-05	0.000946565	0.000790839	0.00099488	0.00303839	0.00437109	0.00636237
	M24		0	7.86161e-05	0.000752139	0	0	4.46329e-05	0	0	0	0	0	0	0.00046465	0.000418633	0.000607329	0.00221396	0.00264546	0.00416151
	M25		0	3.49374e-05	0.000133551	0	0	0	0	1.95132e-05	3.90015e-05	0	0	0	0.00033519	0.000371716	0.000174603	0.000988115	0.00168911	0.0023559
	M26		0	0	0.000130492	0	0	0	0	0	0	0	0	0	0	0.000167323	4.13537e-05	0.000624509	0.000739535	0.00122555
PC(38:6)	M0		0.258318	0.254333	0.263312	0.260537	0.259968	0.259402	0.247284	0.242745	0.240256	0.155694	0.150802	0.156628	0.0873347	0.0777895	0.0831175	0.0402405	0.0398339	0.0402682
	M1		0	0	0	0	0	0	0.00187097	0.00201823	0.00506802	0.0115402	0.0132581	0.0079291	0.00939642	0.00823981	0.010226	0.00561815	0.00349161	0.00301464
	M2		0	0	0	0	0	0	0.00933353	0.0137468	0.0114622	0.0248482	0.0236412	0.0260529	0.0187675	0.0188458	0.0181284	0.00792974	0.00651928	0.00722921
	M3		0	0	0	0	0	0	0.00124963	0.0017704	0.00158717	0.0136445	0.0141397	0.01326	0.0159847	0.0144785	0.0159785	0.0094514	0.00906272	0.00775027
	M4		0	0	0	0	0	0	0.00181341	0.00343011	0.00320142	0.0155716	0.0162598	0.0168416	0.0197851	0.0195155	0.0199532	0.0103021	0.0102419	0.00975615
	M5		0	0	0	0	5.98428e-05	0	0.000436556	0.0010769	0.00062529	0.0100081	0.0107529	0.0102115	0.0164542	0.0163414	0.0157055	0.0134891	0.0119992	0.011091
	M6		2.77984e-05	0.000315401	7.23327e-05	1.79774e-05	7.81855e-05	0	0.00047976	0.000672386	0.000956089	0.0105424	0.0108558	0.0108942	0.0187414	0.0192576	0.0187263	0.015914	0.0142796	0.0134929
	M7		0	0	0	0	3.5241e-05	6.88997e-05	9.85195e-05	0.000328451	0	0.00626906	0.00769613	0.0065176	0.0151503	0.0168586	0.0156886	0.0176695	0.0158201	0.0151381
	M8		0.0123363	0.0118595	0.00726007	0.00107909	0.00401523	0.000654594	0.000417992	0.00063733	0.000760715	0.00613606	0.00685231	0.00656585	0.0149278	0.0161432	0.0154242	0.0186262	0.0167307	0.0170229
	M9		0.000337825	0.000369552	0.000158252	0	0	0	3.89933e-06	0	4.57118e-05	0.0032695	0.00438149	0.00470055	0.0122149	0.0134606	0.0129847	0.0170443	0.0185767	0.0165365
	M10		0	0	0	0	0	3.34909e-05	0	9.3587e-05	2.60821e-05	0.00322966	0.00358222	0.00315381	0.010468	0.0117189	0.0111042	0.016979	0.0160919	0.0156935
	M11		0	0	0	2.07421e-05	0	0	0	0	0	0.00226673	0.00246513	0.00248197	0.00844399	0.0102001	0.0092132	0.0150661	0.0157163	0.0160479
	M12		0	0.000231905	0	5.42006e-05	0.000620617	0.000244632	3.01316e-05	7.21912e-05	2.31495e-05	0.00136383	0.00187488	0.00184328	0.00724057	0.00842132	0.00757407	0.0139456	0.0153369	0.0151867
	M13		9.37252e-05	0.000318567	0.000279951	1.80749e-05	0	0	6.67963e-06	0.000119525	0	0.00119712	0.00118831	0.00146605	0.00607223	0.00664709	0.00601252	0.0133658	0.0142798	0.0133397
	M14		0.00223863	0.00537568	0.00205448	0.00207626	0.00191361	0.0025584	0.00102964	0.00087467	0.00118158	0.000613571	0.00083795	0.00105204	0.00423569	0.00556692	0.00542606	0.0131322	0.0137668	0.0131058
	M15		0.000329282	0.000697629	0.000320762	0.000195799	0	2.82616e-05	5.60871e-05	8.80015e-05	0.000106755	0.000514312	0.00071448	0.000555838	0.00359814	0.00396841	0.00392278	0.011674	0.012841	0.012832
	M16		0	0	0	0	0	0	0	3.67675e-05	0	0.000373646	0.000441101	0.000479883	0.00293806	0.00374778	0.00314642	0.00986199	0.0102656	0.0108232
	M17		0	0	0	0	1.5371e-05	0	0	0	3.6431e-05	0.000239496	0.000302315	0.000279966	0.00217095	0.00220029	0.0019576	0.007815	0.00963765	0.0101824
	M18		8.83472e-06	0	0	5.59869e-05	0.00029336	2.15669e-05	4.55461e-06	8.62324e-06	1.28643e-06	0.000132913	0.000192057	0.000144251	0.00145779	0.00192621	0.00143852	0.00642801	0.0070759	0.00855642
	M19		0	4.12449e-05	6.79459e-07	8.87207e-06	1.63929e-06	2.08293e-05	2.14825e-05	2.61858e-05	0	8.75438e-05	0.000118382	0.000239976	0.00106323	0.00104814	0.00138997	0.00491175	0.00637099	0.00730335
	M20		0.000142532	0.000317757	0.000178917	2.81517e-05	0.000129216	4.71145e-05	2.50079e-05	6.79946e-05	6.01966e-05	8.83757e-06	5.22875e-05	7.05531e-05	0.000631734	0.000656905	0.000440124	0.00399374	0.00434649	0.00483861
	M21		0	0	0	0	4.38116e-06	0	1.10514e-05	0	0	3.43424e-05	4.69376e-05	4.76381e-06	0.000515316	0.000563012	0.000396701	0.00280825	0.00280831	0.0040789
	M22		0.00353295	0.00378353	0.0035038	0.0116696	0.0107695	0.0134201	0.0101638	0.00618108	0.00981429	0.0071319	0.00611796	0.00594517	0.000225688	0.000258973	0.0014088	0.00164111	0.00231348	0.00274208
	M23		0.00232128	0.00116041	0.00149802	0.00403487	0.00172696	0.00308466	0.00490646	0.00519324	0.00410489	0.00361349	0.00214496	0.00178811	0.00154149	0.00134857	0	0.00112807	0.00121507	0.00171914
	M24		0.000312883	0.0011839	0.00022908	0.000203377	0.000366809	0.000415066	0.000756388	0.000812471	0.000682384	0.00166863	0.00128131	0.000893386	0.000640155	0.000796744	0.000442728	0.000521783	0.0007585	0.0012558
	M25		0	0	0.00036166	0	0	0	0	0	0	0	0	0	0	0	0	0.000267944	0.000414007	0.000687932
	M26		0	1.16283e-05	0.000769689	0	2.54567e-06	0	0	0	0	0	0	0	0	0	0.000193358	0.000174612	0.00020579	0.000306534
DAG(36:3)	M0		2.27897	2.28442	2.3038	2.39559	2.34416	2.26677	1.82338	1.6236	1.72334	1.39733	1.28041	1.40391	1.19959	1.12237	0.849185	0.81096	0.504327	0.392212
	M1		0	0	0	0	0	0	0.0432148	0.0986397	0.0559256	0.0846522	0.117483	0.0500305	0.0690829	0.0276518	0.0486627	0.495332	0.00160187	0.0173602
	M2		0	0	0	0.00654115	0	0.0585698	0.222001	0.243983	0.232469	0.130768	0.119521	0.102548	0.100276	0.0568279	0.419668	0.223718	0.533736	0.610806
	M3		0	0.00667365	0	0.000896023	0.00868816	0	0.0900978	0.0673543	0.0878247	0.137248	0.134098	0.128464	0.150422	0.141117	0.397841	0.409176	0.379937	0.406595
	M4		0.00238609	0	0	0	0	0.00568291	0.10442	0.163055	0.117707	0.12182	0.142118	0.156929	0.0536221	0.103396	0.131646	0.121888	0	0.203701
	M5		0	0	0.0175799	0	0	0.00460123	0.0439807	0.0646849	0.050827	0.111831	0.105762	0.0676082	0.109091	0.114039	0.335442	0.143226	0.320392	0.388301
	M6		0	0	0.00945777	0	0	0.000715451	0.0479872	0.050321	0.0486768	0.118867	0.11889	0.148806	0.13108	0.16772	0	0.0497113	0	0.0881319
	M7		0	0.0040172	0	0	0	0.0505318	0.0181897	0.0361845	0.0349719	0.0726906	0.0508864	0.0974109	0.0946063	0.106976	0.0983501	0.145829	0.173039	0.226613
	M8		0.0151651	0.0139273	0	0	0	0.00693272	0	0.0206274	0.0234069	0.100146	0.0829691	0.0939519	0.152418	0.126933	0.0371368	0	0.206822	0
	M9		6.24924e-05	0.00220847	0	0.00532334	0	0.0255492	0.00124918	0.0440389	0.0160646	0.0587028	0.073295	0.0619327	0.0700481	0.118857	0.0398703	0	0.0565842	0.0768977
	M10		0.0193426	0.0315529	0.033567	0.0516499	0.103807	0.0307184	0.0573494	0	0.0616444	0.0573665	0.0390064	0.129092	0.175899	0.108301	0.0315655	0.0571383	0.101196	0.0274392
	M11		0.144078	0.117198	0.0955924	0	0.00334922	0.0099245	0.00813427	0.047514	0.00714642	0.0363227	0.195557	0.0193169	0.0424377	0.114618	0.0484935	0.00302174	0.0657855	0.00713854
	M12		0	0	0	0	0	0	0	0	0	0.0322523	0	0	0.111426	0.151188	0.0221392	0	0.116578	0.0148055
DAG(36:4)	M0		3.9846	4.10749	4.07321	3.9463	3.99464	4.05715	2.6754	2.27065	2.58112	1.54403	1.4063	1.31251	1.26962	1.12258	1.32655	0.648941	0.53755	0.580251
	M1		0	0	0	0.142036	0.104804	0	0.257365	0.178787	0.243298	0.170935	0.187832	0.172021	0.105537	0.112907	0.0333734	0.0642848	0.02215	0.0518059
	M2		0	0	0	0.00928532	0.0419849	0.0437159	0.539806	0.625412	0.578685	0.336818	0.367335	0.287772	0.194325	0.141824	0.133697	0.0589739	0.150224	0.113098
	M3		0	0	0	0.0206905	0.000382793	0.00211975	0.205857	0.241009	0.22676	0.284711	0.338099	0.349033	0.183263	0.218238	0.245662	0.585732	0.123492	0.508871
	M4		0.0770062	0.0226427	0	0	0.00810869	0.0188267	0.196407	0.331714	0.201327	0.345072	0.354619	0.334221	0.234132	0.218439	0.233797	0.310709	0.203159	0.211842
	M5		0.0491337	0.000452763	0	0	0.00902714	0	0.0932557	0.144128	0.138536	0.264339	0.259359	0.279181	0.209461	0.201195	0.217998	0.40728	0.246544	0.335999
	M6		0.0302619	0	0.000208391	0	0	0	0.0814623	0.159721	0.0725273	0.282124	0.301831	0.301377	0.266352	0.259427	0.303764	0.35456	0.254532	0.117401
	M7		0.0210186	0.00389981	0.0144476	0	0	0	0.0396492	0.062451	0.0639558	0.224194	0.219487	0.255654	0.243479	0.256705	0.202858	0.178457	0.287912	0.26566
	M8		0.00613329	0	0	0	0	0.00414918	0.0267404	0.0640056	0.0177677	0.210012	0.198753	0.187587	0.251164	0.270772	0.256855	0.352992	0.301598	0.231627
	M9		0.00285574	0.0153045	0.00938125	0.00300011	0.00104484	0.0315679	0.00565979	0.0227427	0.00694387	0.137846	0.140536	0.115244	0.213862	0.208808	0.212535	0.413898	0.267845	0.195522
	M10		0	0.00653721	0.0949948	0.0658182	0	0.00489381	0.0637179	0.0460069	0.0762899	0.122171	0.115856	0.144855	0.208854	0.22931	0.208384	0.0577335	0.274022	0.238934
	M11		0	0.0020851	0	0.0148579	0.0073159	0	0.0109209	0.019742	0	0.0786653	0.0871522	0.114591	0.160052	0.204035	0.176388	0.377095	0.203928	0.203401
	M12		0.0200891	0.0255987	0	0	0.0339614	0.00269568	0	0.00856885	0	0.0645518	0.0720314	0.0795252	0.136079	0.163637	0.127799	0.140027	0.214107	0.212521
	M13		0	0.027668	0.0193145	0.00372158	0.00608724	0.0329132	0.00701189	0.0199262	0.0123257	0.0534017	0.0560079	0.0704726	0.125343	0.164611	0.128871	0.00310577	0.255772	0.1725
	M14		0.00642867	0.00240906	0	0	0.00285798	0.00232045	0	0.00239988	0.000466475	0.031288	0.0437019	0.0565753	0.134012	0.12656	0.12238	0.200804	0.229499	0.209276
	M15		0	0	0	0	0	0	0.000917071	0.00483656	0	0.0294167	0.029703	0.0355642	0.0762016	0.0931849	0.105427	0.000315984	0.195386	0.125258
	M16		0.0138274	0.00384803	0	0	0	0	0	0.000913263	0	0.0222994	0.0168847	0.0233496	0.0800541	0.0870622	0.0882416	0.0104035	0.143539	0.198391
	M17		0	7.23542e-05	0	0	0	0	0	0.00072229	0	0.00142038	0.0164394	0	0.0549044	0.0620758	0.0796559	0	0.127273	0.0474979
	M18		0	0.000769269	0	0.00831628	0	0	0.00615969	0.000935574	0	0.0127364	0.00261288	0.00577672	0.045595	0.0468881	0.00677589	0.032062	0.135142	0.11592
	M19		0.00864872	0.00122245	0.0084414	0.00597695	0.00978941	0.01965	0.00967391	0.015325	0	0.0039702	0.00546092	0.0946884	0.0277075	0.0317385	0.00898984	0.022624	0.0463243	0.0842247
DAG(36:5)	M0		2.96599	2.94411	2.94473	2.93404	2.94722	2.89734	2.17011	1.96041	2.03208	1.14246	1.08676	1.05653	0.865697	0.761894	0.881629	0.473624	0.39749	0.446065
	M1		0	0	0	0	0	0	0.157667	0.103492	0.135271	0.155238	0.136508	0.130039	0.0579078	0.0597446	0.0480852	0	0.0429855	0.0602768
	M2		0	0	0	0	0	0.000752734	0.352063	0.436407	0.394891	0.245272	0.277567	0.290107	0.140292	0.123696	0.172065	0.119345	0.0657868	0.0904422
	M3		0	0	0	0	0	0	0.088267	0.113126	0.0710879	0.230873	0.194329	0.207493	0.164731	0.148947	0.148254	0.118738	0.0897229	0.0965057
	M4		0	0	0	0	0	0	0.113225	0.173359	0.137417	0.237206	0.265101	0.26228	0.200957	0.202922	0.201322	0.210996	0.142786	0.142809
	M5		0	0	0	0	0	0	0.0209843	0.0640035	0.04938	0.186339	0.16991	0.174843	0.1843	0.187744	0.20317	0.108036	0.149832	0.149131
	M6		0	0	0	0.000666602	0	0.000950005	0.040001	0.058629	0.0570434	0.187336	0.205395	0.211775	0.216846	0.234603	0.213944	0.238249	0.194427	0.213328
	M7		0	0	0	0.0336484	0.000221992	0.0481367	0.0169728	0.0159017	0.0904398	0.136168	0.149238	0.151382	0.190573	0.182718	0.197502	0.229613	0.193245	0.195231
	M8		0	0	0	0	0.000247446	0	0.0102264	0.021743	0	0.129931	0.118716	0.118126	0.170468	0.200957	0.180095	0.215734	0.206632	0.196075
	M9		0	0	0	0	0.000325103	0	0	0.00893965	0	0.0889852	0.0953705	0.0865913	0.147225	0.166088	0.144086	0.17028	0.201886	0.154101
	M10		0	0	0	0	0	0	0.00080106	0.00433386	0	0.072043	0.0795883	0.0885323	0.131246	0.144978	0.123773	0.174303	0.183032	0.192876
	M11		0.00429434	0	0	0	0.00102281	0.00753661	4.58705e-05	0.00163818	0	0.0432075	0.0542513	0.0721697	0.116259	0.118876	0.112346	0.18763	0.152387	0.161611
	M12		0.000448692	0	0	0.00113322	0.0171387	0.00347555	0	0.00104861	3.03234e-05	0.0385583	0.044145	0.0395933	0.0987871	0.102938	0.0698508	0.161737	0.164682	0.15609
	M13		0	0	0	0.00158931	0.00375268	0	0.00361704	0.00660138	0.00406576	0.0206386	0.0381315	0.0286007	0.0738095	0.0864304	0.0779509	0.118267	0.166889	0.145242
	M14		0	8.74819e-05	0.000265168	0	0	0	0	0	0	0.0206763	0.02279	0.0194953	0.0578298	0.0678671	0.0538969	0.108511	0.148236	0.119427
	M15		0.00684329	0.0340571	0.0337347	0.00835751	0.00407821	0.00327082	0.00346589	0.00761039	0.00829773	0.0136032	0.0165635	0.0231904	0.0518675	0.0606863	0.049165	0.098435	0.128321	0.0992918
	M16		0.00242593	0	0	0	0	0.000813989	0	0.00249364	0	0.0126309	0.0130793	0	0.0295336	0.0338477	0.0370283	0.0832036	0.107469	0.0868679
	M17		0	0	0.00127335	0.000561462	0	0.00133675	0	0	0	0.00464393	0.00813495	0.00797596	0.0285223	0.0327132	0.0245625	0.0649418	0.0926322	0.11414
	M18		0	0.00174091	0	0	0.00253018	0	0	0.00025913	0	0.00425997	0	0	0.0218825	0.0269759	0.0265515	0.0359717	0.0461181	0.0643772
	M19		0	0	0	0	0	0	0	0	0	0.00153133	0	0	0.0132344	0.0163153	0.00686125	0.0331582	0.0558194	0.0489462
	M20		0	0	0	0	0.001333	0	0	0	0	0.00112211	0.000974846	0	0.0109364	0.0116953	0.00649573	0.0157091	0.0294141	0.0291089
	M21		0	0	0	0	0.00213375	0.0163832	0.00255207	0	0	0.007275	0.00344411	0.0112821	0.00709501	0.00736281	0.00136593	0.0135161	0.0202067	0.0180597
DAG(36:6)	M0		3.82	3.81774	3.82	3.72999	3.79168	3.67769	3.21627	2.94756	3.13242	2.13718	2.15225	2.08988	1.55983	1.61733	1.65511	0.773792	0.762425	0.807983
	M1		0	0	0	0	0	0.026934	0.0749633	0.0594831	0.0860028	0.19106	0.162597	0.225487	0.108023	0.120605	0.0540081	0.0855798	0.0331049	0.0515691
	M2		0	0	0	0	0	0	0.197235	0.244673	0.23926	0.327344	0.347603	0.348081	0.225745	0.177538	0.199486	0.090074	0.0983474	0.089694
	M3		0	0	0	0	0	0	0.0517889	0.0628719	0.0405716	0.211089	0.195789	0.195185	0.206843	0.176558	0.20255	0.157421	0.115718	0.129541
	M4		0	0	0	0	0	0	0.0487533	0.0844218	0.0689341	0.247361	0.242887	0.270355	0.252128	0.214049	0.197495	0.170169	0.138941	0.168504
	M5		0	0	0	0	0	0	0.00822185	0.0153054	0.0140274	0.141217	0.14897	0.119909	0.205049	0.203343	0.231933	0.180545	0.179194	0.151722
	M6		0	0	0	0.00128937	8.30585e-05	0.001617	0.0183349	0.0218641	0.0210111	0.156884	0.178668	0.16383	0.22528	0.218461	0.211912	0.264891	0.226636	0.231445
	M7		0	0	0	0.0843826	0.0124481	0.103489	0.176782	0.29904	0.181255	0.104577	0.0939523	0.102786	0.200016	0.198702	0.191549	0.224449	0.219813	0.244906
	M8		0	0	0	0	0	0	0	0.00392468	0.00613943	0.0924807	0.0844041	0.0914167	0.159344	0.169372	0.232184	0.244005	0.26895	0.226779
	M9		0	0	0	0	0	0	0.0221656	0.045064	0.0118553	0.057976	0.0566302	0.051033	0.136131	0.153598	0.113846	0.256835	0.216989	0.262072
	M10		0	0	0	0	0	0	0.00444381	0.00936999	0.0121104	0.0448471	0.0475246	0.0564845	0.131738	0.131839	0.120605	0.202261	0.228204	0.187393
	M11		0	0	0	0.00119575	0.00653717	0.0058536	0	0.0183395	0.00150099	0.0336623	0.0339077	0.0351218	0.0935045	0.104498	0.091761	0.251152	0.213311	0.193232
	M12		0	0	0	0.00105424	0.000169445	0	0	0.00509902	0.00260717	0.0301587	0.0296197	0.028071	0.0786854	0.0811719	0.0701661	0.186228	0.194011	0.156522
	M13		0	0	0	0	0	0.00301407	0	0	0	0.0178104	0.014667	0.019341	0.0656905	0.0624871	0.0641171	0.154974	0.177227	0.178538
	M14		0	0	0	0	0	0	2.15197e-06	0	0	0.00946587	0.0138326	0.0105212	0.0454066	0.0549905	0.0678491	0.147646	0.151153	0.146453
	M15		0	0	0	0.00110003	0.00123749	0	0.00104019	0	0	0.00892448	0	0.0115214	0.0501671	0.0412551	0.0328707	0.108861	0.147832	0.145817
	M16		0	0	0	0	0	0	0	1.23317e-05	0	0.00237318	0.00924279	0	0.0247219	0.0358641	0.0333391	0.121932	0.133005	0.105069
	M17		0	0	0	0	0.00299294	0	0	0.00296731	1.1301e-05	0.00371406	0	0.000978698	0.0191276	0.0183905	0.0230429	0.0744174	0.0824009	0.104004
	M18		0	1.26105e-07	0	0	0.000132431	0	0	0	0.00228864	0.0018657	0.000165296	0	0.014421	0.0177102	0.00861843	0.0538278	0.0876186	0.0899489
	M19		0	7.63045e-06	0	0	0	1.08846e-07	0	0	0	8.50164e-06	0.000674074	0	0.00990424	0.00810233	0.00766398	0.0362966	0.0618222	0.0537777
	M20		0	0.00225622	0	2.53117e-06	0.000133499	3.63884e-06	0	0	0	0	0	0	0.00542999	0.0116085	0.00601812	0.0230254	0.03969	0.0407671
	M21		0	0	0	0.00098715	0	0.00139985	0	0	0	0	0.000105518	0	0.00256521	0.0022981	0.0038739	0.00550263	0.0288236	0.0332342
	M22		0	0	0	0	0.00458495	0	0	0	0	0	0.00651327	0	0.000250356	0.000224775	0	0.00611415	0.0147829	0.0210281

## Sheet: Label enrichment (nmol of 13C)
Table 4: Label enrichment, represented as nmol. Data represents a sum of all the isotopologues (M1-Mn) presented in table 3.
	Time (hours)	0			2			4			8			16			32
ID	Replicate	1	2	3	1	2	3	1	2	3	1	2	3	1	2	3	1	2	3
PC(34:1)		0.00603191	0.0025251	0.0145529	0.0152764	0.113264	0.0182258	0.168379	0.203397	0.174213	0.31871	0.317743	0.317366	0.417649	0.41174	0.405971	0.505119	0.505151	0.493379
PC(34:2)		0.134966	0.12489	0.101709	0.272383	0.621482	0.283827	0.999788	1.23646	0.939014	2.04907	2.10101	2.24372	2.61508	2.76094	2.71851	3.3279	3.35316	3.2469
PC(34:3)		0.0280494	0.0405343	0.0530658	0.0411367	0.0600219	0.0512853	0.285735	0.398128	0.3618	1.14724	1.19389	1.19317	1.76023	1.84322	1.81053	2.37683	2.40807	2.37991
PC(36:2)		0.033887	0.0153702	0.00848657	0.062373	0.0989899	0.0535198	0.435922	0.461977	0.408349	0.702892	0.66424	0.66938	0.883387	0.85962	0.887662	1.09218	1.16218	1.09424
PC(36:3)		0.0351245	0.0215179	0.0244904	0.172074	0.115639	0.149957	1.03551	1.28057	1.06532	1.8622	1.82726	1.87967	2.8133	2.88317	2.88495	3.30627	3.39002	3.28537
PC(36:4)		0.108073	0.150367	0.130413	0.799074	0.733754	0.763968	2.9772	3.63751	3.06851	4.74203	4.93331	5.14414	5.45839	5.69933	5.69557	6.59742	6.70556	6.44237
PC(36:5)		0.0167868	0.0173357	0.0127456	0.0708333	0.218553	0.105478	2.47396	3.04416	2.60166	5.48023	5.66968	5.64928	6.38606	6.57946	6.52249	7.50583	7.65499	7.49667
PC(36:6)		0.035881	0.0548495	0.0353445	0.0174638	0.0527842	0.0159862	0.671952	0.869043	0.751942	2.46021	2.53611	2.53802	3.35303	3.44864	3.37861	4.26489	4.33732	4.26833
PC(38:3)		0.00233981	0.00673789	0.0281896	0.00909987	0.0284405	0.0073345	0.243302	0.286761	0.241861	0.481555	0.478857	0.486086	0.566713	0.575448	0.570769	0.636382	0.642956	0.639259
PC(38:4)		0.00715525	0.00800182	0.0395345	0.0135773	0.0658964	0.0114175	0.466151	0.564468	0.51364	1.34194	1.32147	1.35297	1.64734	1.68356	1.67299	1.85736	1.87675	1.86162
PC(38:5)		0.047255	0.0501629	0.0446768	0.089033	0.147571	0.0818086	0.183204	0.237685	0.209126	0.548532	0.568491	0.565971	0.740364	0.766799	0.758421	0.8699	0.873333	0.872564
PC(38:6)		0.021682	0.0256667	0.0166877	0.019463	0.0200325	0.0205976	0.0327155	0.0372549	0.0397437	0.124306	0.129198	0.123372	0.192665	0.20221	0.196882	0.239759	0.240166	0.239732
DAG(36:3)		0.181034	0.175577	0.156197	0.0644104	0.115845	0.193226	0.636624	0.836403	0.736664	1.06267	1.17959	1.05609	1.26041	1.33763	1.61082	1.64904	1.95567	2.06779
DAG(36:4)		0.235403	0.11251	0.146788	0.273703	0.225364	0.162853	1.5446	1.94935	1.63888	2.67597	2.8137	2.90749	2.95038	3.09742	2.89345	3.57106	3.68245	3.63975
DAG(36:5)		0.0140123	0.0358855	0.0352732	0.0459565	0.0327839	0.0826564	0.809889	1.01959	0.947924	1.83754	1.89324	1.92347	2.1143	2.21811	2.09837	2.50638	2.58251	2.53394
DAG(36:6)		0	0.00226398	0	0.0900117	0.0283191	0.142311	0.603731	0.872436	0.687575	1.68282	1.66775	1.73012	2.26017	2.20267	2.16489	3.04621	3.05757	3.01202

## Sheet: PC(36)_MS2_Labeling
Table 5: Labeling in acyl chains of PCs analyzed using MS2 of each isotope enriched precursor. Data shown for PC(36:x)
MIDs (NA corrected)																		nmol converted
Time	Precursor		PC(36:2)			PC(36:3)				PC(36:4)			PC (36:5)		PC(36:6)			Time	Precursor		PC(36:2)			PC(36:3)				PC(36:4)			PC (36:5)		PC(36:6)
	Precursor		PC(18:0/18:2)		PC(18:1/18:1)	PC(18:0/18:3)		PC(18:1/18:2)		PC(18:1/18:3)		PC(18:2/18:2)	PC(18:2)/18:3)		PC(18:3/18:3)				Precursor		PC(18:0/18:2)		PC(18:1/18:1)	PC(18:0/18:3)		PC(18:1/18:2)		PC(18:1/18:3)		PC(18:2/18:2)	PC(18:2)/18:3)		PC(18:3/18:3)
		Proportions based on UL control	0.64		0.36	0.55		0.45		0.54		0.45	1		1
	Acyl chains		FA(18:0)	FA(18:2)	FA(18:1)	FA(18:0)	FA(18:3)	FA(18:1)	FA(18:2)	FA(18:1)	FA(18:3)	FA(18:2)	FA(18:2)	FA(18:3)	FA(18:3)				Acyl chains		FA(18:0)	FA(18:2)	FA(18:1)	FA(18:0)	FA(18:3)	FA(18:1)	FA(18:2)	FA(18:1)	FA(18:3)	FA(18:2)	FA(18:2)	FA(18:3)	FA(18:3)
2 hours	PC (36:x)_M0	nmol of M0 @ MS1	1.34837			4.13411				6.8044			8.45838		5.01126			2 hours	PC (36:x)_M0
		nmol of individual acyl chain	0.431479	0.431479	0.485414	1.13688	1.13688	0.930175	0.930175	1.83719	1.83719	3.06198	4.22919	4.22919	5.01126
		M0	100	100	100	100	100	100	100	100	100	100	100	100	100					M0	0.431479	0.431479	0.485414	1.13688	1.13688	0.930175	0.930175	1.83719	1.83719	3.06198	4.22919	4.22919	5.01126
	PC (36:x)_M2	nmol of M2 @MS1	0.0332471			0.0441858				0.0901434			0.0348246		0.001				PC (36:x)_M2
		nmol of individual acyl chain	0.0106391	0.0106391	0.0119689	0.0121511	0.0121511	0.00994182	0.00994182	0.0243387	0.0243387	0.0405645	0.0174123	0.0174123	0.001
		M0	0	0	0	68.45	57.53	49.11	63.18	45.11	70.67	54.33	56.06	58.42	56.55					M0	0	0	0	0.00831743	0.00699053	0.00488243	0.00628124	0.0109792	0.0172002	0.0220387	0.00976134	0.0101723	0.0005655
		M1	0	0	0	31.55	41.28	39.09	32.05	34.58	24.56	35.98	30.52	34.93	37.75					M1	0	0	0	0.00383367	0.00501598	0.00388626	0.00318635	0.00841633	0.00597759	0.0145951	0.00531424	0.00608212	0.0003775
		M2	0	0	0	0	1.19	11.81	4.77	20.31	4.78	9.7	13.42	6.65	5.7					M2	0	0	0	0	0.000144598	0.00117413	0.000474225	0.00494319	0.00116339	0.00393476	0.00233673	0.00115792	5.7e-05
		Average Labeling	0	0	0	0.717045	0.992273	1.42523	0.945227	1.70909	0.775455	1.25864	1.30364	1.09614	1.11705					natom equivalents	0	0	0	0.00383367	0.00530517	0.00623451	0.0041348	0.0183027	0.00830437	0.0224646	0.0099877	0.00839796	0.0004915
4 hours	PC (36:x)_M0	nmol of M0 @ MS1	0.984584			3.15287				4.34226			5.88341		4.27569			4 hours	PC (36:x)_M0
		nmol of individual acyl chain	0.315067	0.315067	0.35445	0.867038	0.867038	0.709395	0.709395	1.17241	1.17241	1.95402	2.94171	2.94171	4.27569
		M0	100	100	100	100	100	100	100	100	100	100	100	100	100					M0	0.315067	0.315067	0.35445	0.867038	0.867038	0.709395	0.709395	1.17241	1.17241	1.95402	2.94171	2.94171	4.27569
	PC (36:x)_M2	nmol of M2 @ MS1	0.130218			0.346995				1.01282			1.16798		0.417387				PC (36:x)_M2
		nmol of individual acyl chain	0.0416697	0.0416697	0.0468784	0.0954236	0.0954236	0.0780738	0.0780738	0.273462	0.273462	0.455771	0.583991	0.583991	0.417387
		M0	78.89	36.87	46.64	61.09	56.39	38.19	67.85	19.22	91.37	55.81	67.8	42.95	54.15					M0	0.0328732	0.0153636	0.0218641	0.0582943	0.0538094	0.0298164	0.0529731	0.0525595	0.249863	0.254366	0.395946	0.250824	0.226015
		M1	21.11	29.61	25.72	25.42	24.66	16.3	8.62	14.81	0.81	11.04	9.16	14.07	19.5					M1	0.00879647	0.0123384	0.0120571	0.0242567	0.0235315	0.012726	0.00672997	0.0404998	0.00221505	0.0503171	0.0534936	0.0821675	0.0813904
		M2	0	33.52	27.64	13.49	18.95	45.51	23.53	65.97	7.83	33.15	23.04	42.98	26.36					M2	0	0.0139677	0.0129572	0.0128726	0.0180828	0.0355314	0.0183708	0.180403	0.0214121	0.151088	0.134552	0.250999	0.110023
	PC (36:x)_M4	nmol of M4 @ MS1	0.0700979			0.181748				0.45747			0.423216		0.110267				PC (36:x)_M4
		nmol of individual acyl chain	0.0224313	0.0224313	0.0252352	0.0499806	0.0499806	0.0408932	0.0408932	0.123517	0.123517	0.205862	0.211608	0.211608	0.110267
		M0	0	0	0	65.49	37.5	19.71	47.57	7.26	86.04	34.98	14.5	69.51	39.16					M0	0	0	0	0.0327323	0.0187427	0.00806005	0.0194529	0.00896733	0.106274	0.0720104	0.0306832	0.147089	0.0431806
		M1	0	0	0	7.1	9.08	6.85	6.5	2.73	2.89	6.82	4.22	3.64	9.41					M1	0	0	0	0.00354862	0.00453824	0.00280119	0.00265806	0.00337201	0.00356964	0.0140398	0.00892986	0.00770253	0.0103761
		M2	0	0	0	27.41	22.58	32.15	30.55	15.97	8.15	30.01	21.59	15.85	19.56					M2	0	0	0	0.0136997	0.0112856	0.0131472	0.0124929	0.0197257	0.0100666	0.0617791	0.0456862	0.0335399	0.0215682
		M3	0	0	0	0	7.05	9.09	2.06	13.03	0	4.82	12.04	1.37	7.91					M3	0	0	0	0	0.00352363	0.00371719	0.0008424	0.0160943	0	0.00992253	0.0254776	0.00289903	0.00872213
		M4	0	0	0	0	23.79	32.19	13.31	61.03	2.92	23.38	47.66	9.63	23.97					M4	0	0	0	0	0.0118904	0.0131635	0.00544289	0.0753824	0.00360669	0.0481304	0.100852	0.0203778	0.026431
	PC (36:x)_M6	nmol of M6 @ MS1	0.0352902			0.0885903				0.187495			0.141731		0.031925				PC (36:x)_M6
		nmol of individual acyl chain	0.0112929	0.0112929	0.0127045	0.0243623	0.0243623	0.0199328	0.0199328	0.0506237	0.0506237	0.0843728	0.0708654	0.0708654	0.031925
		M0	0	0	0	0	0	10.16	32.5	15.53	71.6	21.45	13.67	54.18	28.55					M0	0	0	0	0	0	0.00202517	0.00647816	0.00786186	0.0362465	0.018098	0.0096873	0.0383949	0.00911458
		M1	0	0	0	0	0	3	7.36	0	6.32	5.88	0	6.16	5.08					M1	0	0	0	0	0	0.000597984	0.00146706	0	0.00319942	0.00496112	0	0.00436531	0.00162179
		M2	0	0	0	0	0	25.75	28.32	8.62	11.93	25.1	14.58	19.23	17.08					M2	0	0	0	0	0	0.0051327	0.00564497	0.00436376	0.0060394	0.0211776	0.0103322	0.0136274	0.00545279
		M3	0	0	0	0	0	8.9	8.01	5.79	1.44	6.81	6.5	3.44	5.79					M3	0	0	0	0	0	0.00177402	0.00159662	0.00293111	0.000728981	0.00574579	0.00460625	0.00243777	0.00184846
		M4	0	0	0	0	0	25.23	19.52	18.39	8.41	23.54	19.34	13.5	16.36					M4	0	0	0	0	0	0.00502905	0.00389089	0.00930969	0.00425745	0.0198614	0.0137054	0.00956683	0.00522293
		M5	0	0	0	0	0	8.05	0.02	11.55	0	3.54	10.5	0.32	6.7					M5	0	0	0	0	0	0.00160459	3.98656e-06	0.00584703	0	0.0029868	0.00744087	0.000226769	0.00213897
		M6	0	0	0	0	0	18.89	4.27	40.12	0.3	13.67	35.41	3.18	20.43					M6	0	0	0	0	0	0.00376531	0.000851131	0.0203102	0.000151871	0.0115338	0.0250934	0.00225352	0.00652227
		Average Labeling	0.479773	2.19659	1.84091	2.59818	5.29795	15.232	8.51205	19.8016	2.66545	11.8761	16.3723	6.99136	11.7839					natom equivalents	0.00879647	0.0402738	0.0379715	0.0809499	0.144939	0.243607	0.133651	0.999798	0.118575	0.940516	1.17981	0.841013	0.575633
8 hours	PC(36:x)_M0	nmol of M0 @ MS1	0.741163			2.42362				2.63017			2.99027		2.52855			8 hours	PC(36:x)_M0
		nmol of individual acyl chain	0.237172	0.237172	0.266819	0.666496	0.666496	0.545315	0.545315	0.710147	0.710147	1.18358	1.49514	1.49514	2.52855
		M0	100	100	100	100	100	100	100	100	100	100	100	100	100					M0	0.237172	0.237172	0.266819	0.666496	0.666496	0.545315	0.545315	0.710147	0.710147	1.18358	1.49514	1.49514	2.52855
	PC (36:x)_M2	nmol of M2 @ MS1	0.0761928			0.234055				0.534345			0.705535		0.463161				PC (36:x)_M2
		nmol of individual acyl chain	0.0243817	0.0243817	0.0274294	0.0643652	0.0643652	0.0526624	0.0526624	0.144273	0.144273	0.240455	0.352768	0.352768	0.463161
		M0	0	0	0	75.45	49.22	46.2	64.03	25.45	85.7	58.8	33.17	79.42	56.11					M0	0	0	0	0.0485635	0.0316805	0.02433	0.0337198	0.0367175	0.123642	0.141388	0.117013	0.280168	0.259879
		M1	0	0	0	18.41	24.3	22.18	18.97	15	3.92	19.06	14.99	6.94	14.45					M1	0	0	0	0.0118496	0.0156407	0.0116805	0.00999006	0.021641	0.00565551	0.0458308	0.0528799	0.0244821	0.0669267
		M2	0	0	0	6.14	26.48	31.62	17	59.55	10.38	22.15	51.85	13.64	29.45					M2	0	0	0	0.00395202	0.0170439	0.0166519	0.00895261	0.0859146	0.0149755	0.0532608	0.18291	0.0481175	0.136401
	PC (36:x)_M4	nmol of M4 @ MS1	0.0729879			0.203851				0.580229			0.718507		0.350976				PC (36:x)_M4
		nmol of individual acyl chain	0.0233561	0.0233561	0.0262756	0.0560589	0.0560589	0.0458664	0.0458664	0.156662	0.156662	0.261103	0.359254	0.359254	0.350976
		M0	0	0	0	84.4	30.46	29.8	61.31	6.4	84.04	42.27	13.51	78.6	45.01					M0	0	0	0	0.0473137	0.0170755	0.0136682	0.0281207	0.0100264	0.131659	0.110368	0.0485352	0.282373	0.157974
		M1	0	0	0	0	6.01	0.7	0.48	4.44	1.15	6.35	3	0.26	4.25					M1	0	0	0	0	0.00336914	0.000321065	0.000220159	0.00695579	0.00180161	0.0165801	0.0107776	0.000934059	0.0149165
		M2	0	0	0	6.12	11.26	11.22	14.31	12.39	6.22	15.92	11.81	8.91	11.06					M2	0	0	0	0.0034308	0.00631223	0.00514621	0.00656348	0.0194104	0.00974437	0.0415676	0.0424279	0.0320095	0.038818
		M3	0	0	0	0	12.02	16.52	5.22	17.06	2.69	9.83	15.43	3.14	8.3					M3	0	0	0	0	0.00673828	0.00757712	0.00239422	0.0267265	0.00421421	0.0256664	0.0554328	0.0112806	0.029131
		M4	0	0	0	9.48	40.26	41.77	18.68	59.72	5.91	25.63	56.25	9.09	31.39					M4	0	0	0	0.00531438	0.0225693	0.0191584	0.00856784	0.0935585	0.00925872	0.0669208	0.20208	0.0326562	0.110171
	PC (36:x)_M6	nmol of M6 @ MS1	0.0640888			0.165406				0.508184			0.57003		0.242968				PC (36:x)_M6
		nmol of individual acyl chain	0.0205084	0.0205084	0.023072	0.0454867	0.0454867	0.0372164	0.0372164	0.13721	0.13721	0.228683	0.285015	0.285015	0.242968
		M0	0	0	0	100	32.58	9.14	39.71	9.34	75.58	28.97	8.51	60.76	35.72					M0	0	0	0	0.0454867	0.0148196	0.00340158	0.0147786	0.0128154	0.103703	0.0662494	0.0242548	0.173175	0.0867883
		M1	0	0	0	0	0	6.34	7.98	0	0.67	3.67	2.05	3.83	1.86					M1	0	0	0	0	0	0.00235952	0.00296987	0	0.000919304	0.00839265	0.00584281	0.0109161	0.00451921
		M2	0	0	0	0	2.93	17.74	16.2	6.13	8.27	15.67	6.31	10.64	10.16					M2	0	0	0	0	0.00133276	0.00660219	0.00602906	0.00841095	0.0113472	0.0358346	0.0179845	0.0303256	0.0246856
		M3	0	0	0	0	8.74	10.94	7.05	7.1	4.99	8.69	4.91	4.14	5.99					M3	0	0	0	0	0.00397554	0.00407148	0.00262376	0.00974188	0.00684676	0.0198725	0.0139942	0.0117996	0.0145538
		M4	0	0	0	0	11.74	16.12	11.12	13.55	5	16.95	10.02	8.15	11.13					M4	0	0	0	0	0.00534014	0.00599929	0.00413847	0.0185919	0.00686048	0.0387617	0.0285585	0.0232287	0.0270424
		M5	0	0	0	0	24.26	16.68	5.92	20.43	0.49	7.9	20.48	3.64	9.07					M5	0	0	0	0	0.0110351	0.0062077	0.00220321	0.0280319	0.000672327	0.0180659	0.0583711	0.0103746	0.0220372
		M6	0	0	0	0	19.75	23.03	12.02	43.45	5	18.15	47.72	8.84	26.06					M6	0	0	0	0	0.00898363	0.00857094	0.00447341	0.0596176	0.00686048	0.0415059	0.136009	0.0251953	0.0633175
	PC (36:x)_M8	nmol of M8 @ MS1	0.0509416			0.1299				0.366215			0.40666		0.140778				PC (36:x)_M8
		nmol of individual acyl chain	0.0163013	0.0163013	0.018339	0.0357224	0.0357224	0.0292275	0.0292275	0.0988781	0.0988781	0.164797	0.20333	0.20333	0.0703892
		M0	0	0	0	0	44.68	0	24.14	0	65.53	17.04	6.96	53.13	29.4					M0	0	0	0	0	0.0159608	0	0.00705551	0	0.0647948	0.0280814	0.0141518	0.108029	0.0206944
		M1	0	0	0	0	0	5.63	0	0	2.48	10.03	1.88	4.92	2.7					M1	0	0	0	0	0	0.00164551	0	0	0.00245218	0.0165291	0.0038226	0.0100038	0.00190051
		M2	0	0	0	0	0	6.34	17.02	0	13.97	9.05	6	9.99	9.09					M2	0	0	0	0	0	0.00185302	0.00497451	0	0.0138133	0.0149141	0.0121998	0.0203126	0.00639838
		M3	0	0	0	0	0	17.03	15.21	2.31	5.43	10.48	5.24	6.16	5.31					M3	0	0	0	0	0	0.00497744	0.0044455	0.00228409	0.00536908	0.0172707	0.0106545	0.0125251	0.00373767
		M4	0	0	0	0	0	29.49	13.14	13.18	10.39	14.98	11.81	10.99	11.37					M4	0	0	0	0	0	0.00861918	0.00384049	0.0130321	0.0102734	0.0246866	0.0240132	0.0223459	0.00800325
		M5	0	0	0	0	0.01	10.18	14.24	12.2	2.2	11.53	9.79	4.59	7.31					M5	0	0	0	0	3.57224e-06	0.00297536	0.00416199	0.0120631	0.00217532	0.0190011	0.019906	0.00933284	0.00514545
		M6	0	0	0	0	14.51	14.66	8.94	16.33	0	11.2	13.28	4.28	10.23					M6	0	0	0	0	0.00518333	0.00428475	0.00261293	0.0161468	0	0.0184573	0.0270022	0.00870251	0.00720081
		M7	0	0	0	0	0	4.56	3.16	20.62	0	7.89	13.44	2.02	7.36					M7	0	0	0	0	0	0.00133277	0.000923588	0.0203887	0	0.0130025	0.0273275	0.00410726	0.00518064
		M8	0	0	0	0	40.8	12.12	4.14	35.36	0	7.8	31.62	3.92	17.23					M8	0	0	0	0	0.0145748	0.00354237	0.00121002	0.0349633	0	0.0128542	0.0642929	0.00797053	0.0121281
		Average Labeling	0	0	0	1.8375	23.5282	25.9318	15.7384	35.2236	5.77	19.8366	32.4389	9.56636	20.5941					natom equivalents	0	0	0	0.0478728	0.46896	0.422216	0.251286	1.95054	0.320851	1.82736	3.91831	1.12205	1.91632

## Sheet: DAG(36)_MS2_Labeling
Table 6: Labeling in acyl chains of DAGs analyzed using MS2 of each isotope enriched precursor. Data shown for DAG(36:x)
MIDs (NA corrected)																		nmol converted
Time	Precursor		DAG(36:2)			DAG(36:3)				DAG(36:4)			DAG (36:5)		DAG(36:6)			Time	Precursor		DAG(36:2)			DAG(36:3)				DAG(36:4)			DAG (36:5)		DAG(36:6)
	Precursor		DAG(18:0/18:2)		DAG(18:1/18:1)	DAG(18:0/18:3)		DAG(18:1/18:2)		DAG(18:1/18:3)		DAG(18:2/18:2)	DAG(18:2)/18:3)		DAG(18:3/18:3)				Precursor		DAG(18:0/18:2)		DAG(18:1/18:1)	DAG(18:0/18:3)		DAG(18:1/18:2)		DAG(18:1/18:3)		DAG(18:2/18:2)	DAG(18:2)/18:3)		DAG(18:3/18:3)
		Proportions based on UL control	0.4		0.6	0.35		0.65		0.65		0.35	1		1
	Acyl chains		FA(18:0)	FA(18:2)	FA(18:1)	FA(18:0)	FA(18:3)	FA(18:1)	FA(18:2)	FA(18:1)	FA(18:3)	FA(18:2)	FA(18:2)	FA(18:3)	FA(18:3)				Acyl chains		FA(18:0)	FA(18:2)	FA(18:1)	FA(18:0)	FA(18:3)	FA(18:1)	FA(18:2)	FA(18:1)	FA(18:3)	FA(18:2)	FA(18:2)	FA(18:3)	FA(18:3)
2 hours	DAG (36:x)_M0	nmol of M0 @ MS1				2.33551				3.99936			2.9262		3.73312			2 hours	DAG (36:x)_M0
		nmol of individual acyl chain	0	0	0	0.408714	0.408714	0.75904	0.75904	1.29979	1.29979	1.39978	1.4631	1.4631	3.73312
		M0	100	100	100	100	100	100	100	100	100	100	100	100	100					M0	0	0	0	0.408714	0.408714	0.75904	0.75904	1.29979	1.29979	1.39978	1.4631	1.4631	3.73312
	DAG (36:x)_M2	nmol of M2 @MS1				0.0217036				0.031662			0.000752734		0				DAG (36:x)_M2
		nmol of individual acyl chain	0	0	0	0.00379814	0.00379814	0.00705368	0.00705368	0.0102902	0.0102902	0.0110817	0.000376367	0.000376367	0
		M0	29.97	23.8	38.56	26.47	48.9	39.52	41.94	21.36	50.87	34.67	27.66	36.43	31.63					M0	0	0	0	0.00100537	0.00185729	0.00278762	0.00295832	0.00219798	0.00523461	0.00384203	0.000104103	0.00013711	0
		M1	52.88	56.73	26.25	49.42	45.22	25.81	38.54	38.68	35.09	43.43	46.31	44.75	47.01					M1	0	0	0	0.00187704	0.00171752	0.00182056	0.00271849	0.00398024	0.00361082	0.00481279	0.000174295	0.000168424	0
		M2	17.15	19.47	35.19	24.11	5.88	34.67	19.53	39.96	14.04	21.9	26.03	18.82	21.36					M2	0	0	0	0.000915731	0.000223331	0.00244551	0.00137758	0.00411195	0.00144474	0.0024269	9.79683e-05	7.08322e-05	0
		Average Labeling	1.98136	2.17432	2.19614	2.21909	1.295	2.1625	1.76364	2.69545	1.43568	1.9825	2.23568	1.8725	2.03932					natom equivalents	0	0	0	0.0037085	0.00216418	0.00671158	0.00547366	0.0122041	0.0065003	0.00966658	0.000370232	0.000310089	0
4 hours	DAG (36:x)_M0	nmol of M0 @ MS1				1.72344				2.50906			2.0542		3.09875			4 hours	DAG (36:x)_M0
		nmol of individual acyl chain	0	0	0	0.301601	0.301601	0.560117	0.560117	0.815443	0.815443	0.878169	1.0271	1.0271	3.09875
		M0	100	100	100	100	100	100	100	100	100	100	100	100	100					M0	0	0	0	0.301601	0.301601	0.560117	0.560117	0.815443	0.815443	0.878169	1.0271	1.0271	3.09875
	DAG (36:x)_M2	nmol of M2 @ MS1				0.232818				0.581301			0.394454		0.227056				DAG (36:x)_M2
		nmol of individual acyl chain	0	0	0	0.0407431	0.0407431	0.0756657	0.0756657	0.188923	0.188923	0.203455	0.197227	0.197227	0.227056
		M0	51.34	28.42	37.91	30.1	41.71	37.01	61.66	13.06	82.25	44.68	25.27	70.44	39.95					M0	0	0	0	0.0122637	0.0169939	0.0280039	0.0466555	0.0246733	0.155389	0.0909039	0.0498392	0.138927	0.0907089
		M1	22.55	16.35	12.74	32.86	6.35	9.33	12.46	13.56	2.92	10.9	15	7.69	21.18					M1	0	0	0	0.0133882	0.00258718	0.00705961	0.00942795	0.0256179	0.00551655	0.0221766	0.029584	0.0151667	0.0480905
		M2	26.1	55.23	49.35	37.04	51.94	53.66	25.87	73.38	14.83	44.42	59.73	21.86	38.88					M2	0	0	0	0.0150912	0.021162	0.0406022	0.0195747	0.138632	0.0280173	0.0903749	0.117804	0.0431138	0.0882794
	DAG (36:x)_M4	nmol of M4 @ MS1				0.128394				0.243149			0.141334		0.0673698				DAG (36:x)_M4
		nmol of individual acyl chain	0	0	0	0.022469	0.022469	0.0417281	0.0417281	0.0790236	0.0790236	0.0851023	0.0706668	0.0706668	0.0673698
		M0	87.75	3.95	23.49	0	0	12.65	44.12	3.57	75.21	29.47	13.36	59.66	32.2					M0	0	0	0	0	0	0.0052786	0.0184104	0.00282114	0.0594336	0.0250796	0.00944109	0.0421598	0.0216931
		M1	0	0	4.76	0	0	2.3	4.77	1.14	6.03	3.47	2.07	4.09	4.73					M1	0	0	0	0	0	0.000959746	0.00199043	0.000900869	0.00476512	0.00295305	0.0014628	0.00289027	0.00318659
		M2	5.2	22.7	46.74	0	0	31.79	32.27	11.43	12.64	29.79	17.04	19.27	18.79					M2	0	0	0	0	0	0.0132654	0.0134657	0.00903239	0.00998858	0.025352	0.0120416	0.0136175	0.0126588
		M3	0	0	0	0	0	8.48	4.79	14.19	1.79	6.26	13.42	5.51	10.32					M3	0	0	0	0	0	0.00353854	0.00199878	0.0112134	0.00141452	0.0053274	0.00948349	0.00389374	0.00695256
		M4	7.05	73.35	25	0	0	44.77	14.06	69.66	4.34	31	54.1	11.48	33.95					M4	0	0	0	0	0	0.0186817	0.00586697	0.0550478	0.00342962	0.0263817	0.0382308	0.00811255	0.022872
	DAG (36:x)_M6	nmol of M6 @ MS1				0.048995				0.10457			0.0518911		0.0204033				DAG (36:x)_M6
		nmol of individual acyl chain	0	0	0	0.00857413	0.00857413	0.0159234	0.0159234	0.0339853	0.0339853	0.0365996	0.0259456	0.0259456	0.0204033
		M0	0	0	12.81			0	29.83	1.29	57.61	19.6	9.89	49.57	23.53					M0	0	0	0	0	0	0	0.00474994	0.000438411	0.019579	0.00717352	0.00256602	0.0128612	0.00480091
		M1	0	0	0			5.58	2.11	0.37	9.43	4.16	3.29	4.99	5.72					M1	0	0	0	0	0	0.000888524	0.000335983	0.000125746	0.00320482	0.00152254	0.000853609	0.00129468	0.00116707
		M2	0	0	30.43			20.28	26.33	4.55	17.04	21.98	11.65	20.42	16.4					M2	0	0	0	0	0	0.00322926	0.00419263	0.00154633	0.0057911	0.00804459	0.00302266	0.00529809	0.00334615
		M3	0	0	10.73			0	18.4	2.33	8.65	5.42	2.66	2.84	4.65					M3	0	0	0	0	0	0	0.0029299	0.000791858	0.00293973	0.0019837	0.000690152	0.000736854	0.000948755
		M4	0	0	30.7			29.28	15.41	16.63	5.85	26.02	18.62	12.55	16.66					M4	0	0	0	0	0	0.00466236	0.00245379	0.00565176	0.00198814	0.00952322	0.00483107	0.00325617	0.0033992
		M5	0	0	1.01			10.7	0	14.36	0	1.88	12.72	1.63	7.31					M5	0	0	0	0	0	0.0017038	0	0.0048803	0	0.000688072	0.00330028	0.000422913	0.00149148
		M6	0	0	14.32			34.15	7.92	60.48	1.42	20.93	41.15	8	25.73					M6	0	0	0	0	0	0.00543783	0.00126113	0.0205543	0.000482592	0.0076603	0.0106766	0.00207565	0.00524978
		Average Labeling	2.57614	10.582	14.0114	2.43045	2.50523	18.3798	9.61932	23.2543	4.27273	13.8411	19.2459	7.20886	14.0466					natom equivalents	0	0	0	0.0435706	0.0449111	0.268239	0.141856	0.751607	0.13871	0.48915	0.580965	0.217346	0.428758
8 hours	DAG(36:x)_M0	nmol of M0 @ MS1				1.36055				1.42095			1.09525		2.12644			8 hours	DAG(36:x)_M0
		nmol of individual acyl chain	0	0	0	0.238097	0.238097	0.442179	0.442179	0.461808	0.461808	0.497331	0.547625	0.547625	2.12644
		M0	100	100	100	100	100	100	100	100	100	100	100	100	100					M0	0	0	0	0.238097	0.238097	0.442179	0.442179	0.461808	0.461808	0.497331	0.547625	0.547625	2.12644
	DAG (36:x)_M2	nmol of M2 @ MS1				0.117613				0.330642			0.270982		0.341009				DAG (36:x)_M2
		nmol of individual acyl chain	0	0	0	0.0205822	0.0205822	0.0382241	0.0382241	0.107459	0.107459	0.115725	0.135491	0.135491	0.341009
		M0	60.07	14.47	45.36	48.73	25.27	24.25	60.16	14.25	75.65	36.7	21.05	65.82	39.73					M0	0	0	0	0.0100297	0.00520113	0.00926935	0.0229956	0.0153128	0.0812924	0.0424709	0.0285209	0.0891802	0.135483
		M1	17.78	29.58	12.75	15.7	27.21	26.75	9.61	15.42	7.69	21.17	15.27	10.46	17.99					M1	0	0	0	0.00323141	0.00560042	0.0102249	0.00367334	0.0165701	0.00826356	0.0244989	0.0206895	0.0141724	0.0613476
		M2	22.15	55.95	41.89	35.57	47.53	49	30.23	70.34	16.67	42.13	63.69	23.73	42.29					M2	0	0	0	0.00732109	0.00978273	0.0187298	0.0115551	0.0755863	0.0179133	0.0487548	0.0862942	0.032152	0.144213
	DAG (36:x)_M4	nmol of M4 @ MS1				0.140289				0.344637			0.254862		0.253534				DAG (36:x)_M4
		nmol of individual acyl chain	0	0	0	0.0245506	0.0245506	0.0455939	0.0455939	0.112007	0.112007	0.120623	0.127431	0.127431	0.253534
		M0	67.23	0	25.04	58.97	34.61	18.17	58.88	4.95	72.65	33.54	12.2	66.35	35.6					M0	0	0	0	0.0144775	0.00849695	0.00828441	0.0268457	0.00554435	0.0813731	0.040457	0.0155466	0.0845506	0.0902582
		M1	7.66	0	7.74	0	0	5.14	0.79	2.22	6.67	4.81	2.54	4.65	3.95					M1	0	0	0	0	0	0.00234353	0.000360192	0.00248656	0.00747087	0.00580197	0.00323675	0.00592555	0.0100146
		M2	3.14	0	30.28	6.47	5.52	8.53	14.11	7.87	10.38	16.18	8.47	10.97	11.19					M2	0	0	0	0.00158842	0.00135519	0.00388916	0.0064333	0.00881496	0.0116263	0.0195168	0.0107934	0.0139792	0.0283705
		M3	5.82	4.8	0	3.72	6.53	9.82	5.86	13.84	3.93	11.1	12.92	5.25	10.55					M3	0	0	0	0.000913281	0.00160315	0.00447732	0.0026718	0.0155018	0.00440188	0.0133892	0.0164641	0.00669014	0.0267479
		M4	16.15	95.2	36.94	30.84	53.34	58.34	20.36	71.13	6.37	34.36	63.87	12.78	38.72					M4	0	0	0	0.00757139	0.0130953	0.0265995	0.00928292	0.0796706	0.00713485	0.0414461	0.0813903	0.0162857	0.0981684
	DAG (36:x)_M6	nmol of M6 @ MS1				0.128854				0.295111			0.201502		0.166461				DAG (36:x)_M6
		nmol of individual acyl chain	0	0	0	0.0225495	0.0225495	0.0418776	0.0418776	0.095911	0.095911	0.103289	0.100751	0.100751	0.166461
		M0	0	0	15.26	71.48	12.64	7.57	35.52	2.99	59.74	22.61	9.28	51.58	29.33					M0	0	0	0	0.0161184	0.00285026	0.00317014	0.0148749	0.00286774	0.0572972	0.0233536	0.00934968	0.0519673	0.0488229
		M1	0	0	6.69	0	0	2.92	10.48	0.29	8.58	7.08	1.67	9.31	4.73					M1	0	0	0	0	0	0.00122283	0.00438878	0.000278142	0.00822916	0.00731284	0.00168254	0.00937991	0.00787359
		M2	0	0	25.93	1.75	5.77	10.1	13.62	5.08	13.51	11.51	8.02	12.42	10.07					M2	0	0	0	0.000394616	0.00130111	0.00422964	0.00570373	0.00487228	0.0129576	0.0118885	0.00808022	0.0125133	0.0167626
		M3	0	0	23.17	0	0	10.53	11.76	4.35	7.26	11.43	4.37	7.82	5.59					M3	0	0	0	0	0	0.00440972	0.00492481	0.00417213	0.00696314	0.0118059	0.00440281	0.00787872	0.00930516
		M4	0	0	19.41	0	0	19.86	13.69	11.17	5.98	14.68	9.32	5.5	9.68					M4	0	0	0	0	0	0.0083169	0.00573305	0.0107133	0.00573548	0.0151628	0.00938998	0.0055413	0.0161134
		M5	0	0	0	0	4.29	14.17	3.49	15.47	0.79	8.42	12.35	2.89	8.56					M5	0	0	0	0	0.000967373	0.00593406	0.00146153	0.0148374	0.000757697	0.00869691	0.0124427	0.0029117	0.014249
		M6	0	0	9.55	26.78	77.29	34.85	11.44	60.64	4.14	24.28	54.98	10.49	32.04					M6	0	0	0	0.00603876	0.0174285	0.0145944	0.0047908	0.0581604	0.00397071	0.0250785	0.0553928	0.0105688	0.053334
	DAG (36:x)_M8	nmol of M8 @ MS1				0.0923557				0.198784			0.122258		0.0894338				DAG (36:x)_M8
		nmol of individual acyl chain	0	0	0	0.0161622	0.0161622	0.0300156	0.0300156	0.0646048	0.0646048	0.0695744	0.0611288	0.0611288	0.0447169
		M0	0	0	3.73	67.65	0	5.61	17.98	0	11.71	46.28	6.12	38.31	20.23					M0	0	0	0	0.0109338	0	0.00168387	0.0053968	0	0.00756522	0.032199	0.00374108	0.0234184	0.00904623
		M1	0	0	5.62	0	0	0	11.12	0	1.39	13.23	2.65	11.79	4.96					M1	0	0	0	0	0	0	0.00333773	0	0.000898006	0.00920469	0.00161991	0.00720708	0.00221796
		M2	0	0	14.26	0	0	9.29	15.68	3.19	10.29	14.49	4.85	11.29	9.03					M2	0	0	0	0	0	0.00278845	0.00470645	0.00206089	0.00664783	0.0100813	0.00296475	0.00690144	0.00403794
		M3	0	0	15.69	0	0	7.82	7.53	3.52	9.59	13.44	5.79	9.81	8.01					M3	0	0	0	0	0	0.00234722	0.00226017	0.00227409	0.0061956	0.0093508	0.00353936	0.00599673	0.00358183
		M4	0	0	23.39	0	0	18.84	21.6	17.07	12.48	10.51	9.72	9.71	11.46					M4	0	0	0	0	0	0.00565494	0.00648337	0.011028	0.00806268	0.00731227	0.00594172	0.0059356	0.00512456
		M5	0	0	16.11	0	0	9.52	10.6	10.6	5.96	0	7.95	5.42	5.12					M5	0	0	0	0	0	0.00285748	0.00318165	0.00684811	0.00385044	0	0.00485974	0.00331318	0.00228951
		M6	0	0	13.44	0	0	12.72	8.36	15.74	10.59	2.05	14.11	7.96	9.52					M6	0	0	0	0	0	0.00381798	0.0025093	0.0101688	0.00684165	0.00142627	0.00862527	0.00486585	0.00425705
		M7	0	0	2.3	0	17.73	7.46	3.42	10.42	9.04	0	19.11	0.96	7.73					M7	0	0	0	0	0.00286557	0.00223916	0.00102653	0.00673182	0.00584027	0	0.0116817	0.000586836	0.00345662
		M8	0	0	5.45	32.35	82.27	28.75	3.71	39.46	28.96	0	29.7	4.75	23.92					M8	0	0	0	0.00522849	0.0132967	0.00862948	0.00111358	0.025493	0.0187095	0	0.0181552	0.00290362	0.0106963
		Average Labeling	3.59273	12.1973	22.0739	14.9382	37.3923	30.623	16.3682	37.0625	16.0177	17.2977	33.6473	12.0591	23.907					natom equivalents	0	0	0	0.132926	0.323509	0.508195	0.267236	1.44297	0.538039	0.789137	1.40124	0.491593	1.60276
