# Supplementary material for: SIMPEL: using stable isotopes to elucidate dynamics of context specific metabolism
Source: Research Square preprint supplement (doi:10.21203/rs.3.rs-1891366/v1), 2022-10-04
Supplement: Supplementary file 2 [file f1a03ea9c5568a146f03c271.xlsx]

## Sheet: Pool sizes for MFA
Table 1: Pool sizes of metabolites used in MFA (umol g-1 DW).
	Rep_1	Rep_2	Rep_3	Rep_4
Glu	17.79	26.9133	18.5059	26.1515
Asp	11.1268	17.3375	16.4043	16.6673
Suc	2.80066	2.80526	3.4185	2.97397
Fum	3.89201	2.78867	5.27731	3.80625
Mal	108.318	111.073	111.864	99.4543
OGA	4.32657	4.80501	8.87102	5.10205
Note: Values in dark red were used for lower and upper bounds of corresponding metabolite pool size in the flux analysis.
Abbreviations: Glu, Glutamate; Asp, Aspartate; Suc, Succinate; Fum, Fumarate; Mal, Malate; OGA, Oxoglutaric acid.

## Sheet: Labeling_Data
Table 2: MIDs used within the INST-MFA for Arabidopsis roots labeled with [13C5, 15N2]glutamine in a pulse labeled experiment.
			Isotopologues (Avg ± Stdev)
ID	Flux map	Time (hours)	M0	M1	M2	M3	M4	M5
ASP_C	C-based	0	0.976 ± 0.01	0.024 ± 0.01	0 ± 0.01	0 ± 0.01	0 ± 0.01
	C+N based	2	0.927 ± 0.01	0.023 ± 0.01	0.007 ± 0.01	0 ± 0.01	0.042 ± 0.01
		4	0.873 ± 0.011	0.03 ± 0.01	0.018 ± 0.01	0 ± 0.01	0.08 ± 0.01
		6	0.854 ± 0.011	0.033 ± 0.01	0.023 ± 0.01	0 ± 0.01	0.09 ± 0.01
		8	0.796 ± 0.026	0.045 ± 0.01	0.036 ± 0.01	0 ± 0.01	0.124 ± 0.018
ASP_N	C+N based	0	0.999 ± 0.01	0.001 ± 0.01
		2	0.791 ± 0.019	0.21 ± 0.019
		4	0.602 ± 0.017	0.398 ± 0.017
		6	0.553 ± 0.015	0.447 ± 0.015
		8	0.495 ± 0.024	0.505 ± 0.024
FUM	C-based	0	0.973 ± 0.01	0.027 ± 0.01	0 ± 0.01	0 ± 0.01	0 ± 0.01	0 ± 0
	C+N based	2	0.955 ± 0.01	0.031 ± 0.01	0.002 ± 0.01	0 ± 0.01	0.012 ± 0.01	0 ± 0
		4	0.883 ± 0.025	0.037 ± 0.01	0.012 ± 0.01	0.001 ± 0.01	0.067 ± 0.02	0 ± 0
		6	0.808 ± 0.033	0.048 ± 0.01	0.029 ± 0.01	0.002 ± 0.01	0.114 ± 0.023	0 ± 0
		8	0.741 ± 0.024	0.058 ± 0.01	0.048 ± 0.01	0.003 ± 0.01	0.151 ± 0.01	0 ± 0
GLU_C	C-based	0	0.948 ± 0.01	0.051 ± 0.01	0 ± 0.01	0 ± 0.01	0 ± 0.01	0 ± 0.01
	C+N based	2	0.753 ± 0.026	0.041 ± 0.01	0.003 ± 0.01	0.021 ± 0.01	0.002 ± 0.01	0.18 ± 0.032
		4	0.68 ± 0.01	0.044 ± 0.01	0.008 ± 0.01	0.052 ± 0.01	0.004 ± 0.01	0.212 ± 0.01
		6	0.654 ± 0.01	0.044 ± 0.01	0.01 ± 0.01	0.061 ± 0.01	0.004 ± 0.01	0.228 ± 0.01
		8	0.575 ± 0.014	0.049 ± 0.01	0.014 ± 0.01	0.068 ± 0.01	0.005 ± 0.01	0.29 ± 0.023
GLU_N	C+N based	0	0.998 ± 0.01	0.002 ± 0.01
		2	0.761 ± 0.018	0.239 ± 0.018
		4	0.569 ± 0.015	0.431 ± 0.015
		6	0.503 ± 0.014	0.497 ± 0.014
		8	0.486 ± 0.014	0.514 ± 0.014
MAL	C-based	0	0.967 ± 0.022	0.033 ± 0.022	0 ± 0.01	0 ± 0.01	0 ± 0.01
	C+N based	2	0.908 ± 0.01	0.045 ± 0.01	0.006 ± 0.01	0.001 ± 0.01	0.039 ± 0.01
		4	0.804 ± 0.011	0.052 ± 0.01	0.03 ± 0.01	0.003 ± 0.01	0.112 ± 0.01
		6	0.726 ± 0.022	0.062 ± 0.01	0.051 ± 0.01	0.006 ± 0.01	0.154 ± 0.016
		8	0.669 ± 0.027	0.07 ± 0.01	0.066 ± 0.01	0.008 ± 0.01	0.187 ± 0.015
OGA	C-based	0	0.96 ± 0.01	0.036 ± 0.01	0.004 ± 0.01	0 ± 0.01	0 ± 0.01	0 ± 0.01
	C+N based	2	0.805 ± 0.025	0.035 ± 0.01	0.004 ± 0.01	0.017 ± 0.01	0.002 ± 0.01	0.138 ± 0.017
		4	0.662 ± 0.017	0.038 ± 0.01	0.002 ± 0.01	0.05 ± 0.01	0.004 ± 0.01	0.244 ± 0.01
		6	0.591 ± 0.01	0.052 ± 0.01	0.003 ± 0.01	0.081 ± 0.01	0.005 ± 0.01	0.269 ± 0.01
		8	0.566 ± 0.01	0.058 ± 0.01	0.002 ± 0.01	0.094 ± 0.01	0.005 ± 0.01	0.276 ± 0.016
Note: Carbon and Nitrogen based atom transitions for both maps originated from the same dual labeling experiment

## Sheet: Reaction network
Table 3: Reaction network used for the Arabidopsis root model built within INCA for INST-MFA
	Reaction ID	Network equation
Uptake	PGAin	PGA (abc) -> PEP (abc)
	GLNin	GLN.ext (abcdeXY) -> GLN (abcdeXY)
Glycolysis	PK	PEP (abc) -> PYR (abc)
Anaplerosis	PEPC	PEP (abc) + CO2.d (d) -> OAA.c (abcd)
Organic acid synthesis and turn over	PDH	PYR (abc) -> AcCoA (bc) + CO2 (a)
	CITsyn	OAA.m (abcd) + AcCoA (ef) -> CIT (dcbfea)
	ICITdh	CIT (abcdef) -> OGA (abcde) + CO2 (f)
	SUCC	OGA (abcde) -> SUC (bcde) + CO2 (a)
	SDH	SUC (abcd) -> FUM (abcd)
	FUM	FUM (abcd) -> MAL (abcd)
	MDH	MAL (abcd) -> OAA.m (abcd)
Amino acid synthesis and turnover	GOGAT	GLN (abcdeXY) + OGA (fghij) <-> GLU (abcdeY) + GLU (fghijX)
	GDHb	OGA (abcde) + N (Y) <-> GLU (abcdeY)
	ASPat	GLU (abcdeY) + OAA.c (fghi) <-> OGA (abcde) + ASP (fghiY)
Output	Nout1	N (X) -> N.out (X)
	CO2out	CO2 (a) -> CO2.out (a)
	ASPprot	ASP (abcdY) -> ASP.out (abcdY)
Organellar transport	OAAtrans	OAA.m (abcd) <-> OAA.c (abcd)
Active and Inactive metabolite pools	ASPact	0*ASP (abcdY) -> ASP.t (abcdY)
	ASPinact	0*ASP.na (abcdY) -> ASP.t (abcdY)
	ASPpool	ASP.t -> sink
	FUMact	0*FUM (abcd) -> FUM.t (abcd)
	FUMinact	0*FUM.na (abcd) -> FUM.t (abcd)
	FUMpool	FUM.t -> sink
	MALact	0*MAL (abcd) -> MAL.t (abcd)
	MALinact	0*MAL.na (abcd) -> MAL.t (abcd)
	MALpool	MAL.t -> sink
	OGAact	0*OGA (abcde) -> OGA.t (abcde)
	OGAinact	0*OGA.na (abcde) -> OGA.t (abcde)
	OGApool	OGA.t -> sink
	GLUact	0*GLU (abcdeY) -> GLU.t (abcdeY)
	GLUinact	0*GLU.na (abcdeY) -> GLU.t (abcdeY)
	GLUpool	GLU.t -> sink
Abbreviations: PGA, Phosphoglyceric acid; PEP, Phophoenolpyruvate; GLN, Glutamine; PK, Pyruvate kinase; PEPC, Phophoenolpyruvate carboxylase; OAA, Oxaloacetic acid; PDH, Pyruvate dehydrogenase; CIT, Citric acid; PYR, Pyruvic acid; AcCoA, Acetyl CoenzymeA; OGA, Oxoglutaric acid; SUC, Succinic acid; FUM, Fumaric acid; ICITdh, Isocitrate dehydrogenase; MAL, Malate; SDH, Succinate dehydrogenase; MDH,…

## Sheet: Flux_Values
Table 4: Optimum flux values and their confidence intervals for the Arabidopsis root model, determined by INST-MFA.
		Carbon based flux map					Carbon and nitrogen based flux map
	Network equation	Optimum	LB	UB	SE	SE/optimum flux	Optimum	LB	UB	SE	SE/optimum flux
Uptake	PGA -> PEP	29.8201	25.6156	55.6445	7.66043	0.256888	58.7964	52.7634	65.1752	3.16628	0.0538515
	GLN.ext -> GLN	50	28.6386	50	5.44934	0.108987	25	25	27.0414	0.520765	0.0208306
Glycolysis	PEP -> PYR	29.8201	25.6157	38.8307	3.37117	0.11305	33.7964	27.7604	40.1741	3.16676	0.0937011
Anaplerosis	PEP + CO2.d -> OAA.c	1e-07	0	21.3614	5.44934	NaN	25	22.9586	25	0.520765	0.0208306
Organic acid synthesis and turnover	PYR -> AcCoA + CO2	29.8201	25.6157	38.8307	3.37117	0.11305	33.7964	27.7604	40.1741	3.16676	0.0937011
	OAA.m + AcCoA -> CIT	29.8201	25.6157	38.8307	3.37117	0.11305	33.7964	27.7604	40.1741	3.16676	0.0937011
	CIT -> OGA + CO2	29.8201	25.6157	38.8307	3.37117	0.11305	33.7964	27.7604	40.1741	3.16676	0.0937011
	OGA -> SUC + CO2	79.8201	62.0727	88.8288	6.82554	0.0855115	58.7964	52.7604	65.3281	3.20605	0.0545279
	SUC -> FUM	79.8201	62.0727	88.8288	6.82554	0.0855115	58.7964	52.7604	65.3281	3.20605	0.0545279
	FUM -> MAL	79.8201	62.0727	88.8288	6.82554	0.0855115	58.7964	52.7604	65.3281	3.20605	0.0545279
	MAL -> OAA.m	79.8201	62.0727	88.8288	6.82554	0.0855115	58.7964	52.7604	65.3281	3.20605	0.0545279
Amino acid synthesis and turnover	GLN + OGA <-> GLU + GLU	50	28.6386	50	5.44934	0.108987	25	25	27.0414	0.520765	0.0208306
	OGA + N <-> GLU	-50	-50	-7.2772	10.8987	-0.217973	-1.0016e-07	-4.0828	2.8422e-14	1.04153	NaN
	GLU + OAA.c <-> OGA + ASP	50	50	50	0	0	50	50	50	0	0
Output	N -> N.out	50	7.2772	50	10.8987	0.217973	1.0016e-07	-3.5527e-15	4.0828	1.04153	NaN
	CO2 -> CO2.out	139.46	110.659	166.484	14.2411	0.102116	126.389	108.281	145.496	9.4937	0.0751147
	ASP -> ASP.out *	50	50	50	0	0	50	50	50	0	0
Organellar transport	OAA.m <-> OAA.c	50	28.6386	50	5.44934	0.108987	25	25	27.0414	0.520765	0.0208306
Active and inactive metabolite pools	0*ASP -> ASP.t	20.5604	17.6219	38.9648	5.44462	0.264811	50.2591	47.5768	53.2159	1.43855	0.0286226
	0*ASP.na -> ASP.t	79.4396	61.0352	82.3781	5.44462	0.0685378	49.7409	46.7841	52.4232	1.43855	0.0289208
	0*FUM -> FUM.t	20.9436	18.1892	28.31	2.58184	0.123276	29.5305	25.0741	33.9068	2.25324	0.0763021
	0*FUM.na -> FUM.t	79.0564	71.69	81.8108	2.58184	0.0326582	70.4695	66.0932	74.9259	2.25324	0.0319747
	0*MAL -> MAL.t	34.5981	30.7481	49.1666	4.6986	0.135805	52.4744	46.3764	58.3085	3.0439	0.0580074
	0*MAL.na -> MAL.t	65.4019	50.8334	69.2519	4.6986	0.0718419	47.5256	41.6915	53.6236	3.0439	0.0640477
	0*OGA -> OGA.t	48.6529	44.9917	65.2475	5.1673	0.106207	67.9366	61.0587	74.6686	3.47191	0.0511052
	0*OGA.na -> OGA.t	51.3471	34.7525	55.0083	5.1673	0.100635	32.0634	25.3314	38.9413	3.47191	0.108283
	0*GLU -> GLU.t	41.6119	37.9343	54.4563	4.2148	0.101288	54.1615	51.7876	56.6295	1.23518	0.0228055
	0*GLU.na -> GLU.t	58.3881	45.5437	62.0657	4.2148	0.0721859	45.8385	43.3705	48.2124	1.23518	0.0269463
* This reaction has a fixed output flux of 50 units
